# Supplementary material for: Melatonin Activation by Cytochrome P450 Isozymes: How Does CYP1A2 Compare to CYP1A1?
Source: MDPI journal article supplement (doi:10.3390/ijms24043651), 2023-02-11
Supplement: s1 [file s1]

Supporting information

# Melatonin activation by Cytochrome P450 isozymes. How does CYP1A2 compare to CYP1A1?

Thirakorn Mekkawes <sup>1,2</sup>, and Sam P. de Visser <sup>1,2,\*</sup>

<sup>1</sup> Manchester Institute of Biotechnology, The University of Manchester, 131 Princess Street, Manchester M1 7DN, United Kingdom

<sup>2</sup> Department of Chemical Engineering, The University of Manchester, Oxford Road, Manchester M13 9PL, United Kingdom; [sam.devisser@manchester.ac.uk](mailto:sam.devisser@manchester.ac.uk)

---

## Table of Contents

|     |                                                                            |    |
|-----|----------------------------------------------------------------------------|----|
| 1   | Methodology .....                                                          | 1  |
| 1.1 | Primary model preparation.....                                             | 1  |
| 1.2 | Substrate docking.....                                                     | 1  |
| 1.3 | Molecular dynamics simulation .....                                        | 2  |
| 1.4 | Data extraction from molecular dynamics simulation .....                   | 3  |
| 1.5 | Data selection of molecular dynamics simulation.....                       | 3  |
| 1.6 | Modification of small model for quantum mechanics simulation .....         | 3  |
| 1.7 | Quantum mechanics simulation.....                                          | 3  |
| 1.8 | Chemical reaction determination of quantum mechanics simulation .....      | 4  |
| 2   | Reference .....                                                            | 5  |
| 3   | Binding poses of CYP1A2 systems from molecular dynamics simulation .....   | 7  |
| 4   | RMSD of CYP1A1 systems.....                                                | 13 |
| 5   | RMSD matching for different CYP1A2 systems .....                           | 15 |
| 6   | Substrate location in the active sites .....                               | 17 |
| 7   | Amino acid distributions .....                                             | 19 |
| 8   | Linear interaction energy of 10 reactant models of CYP1A2.....             | 20 |
| 9   | Active site cluster of quantum mechanics simulation .....                  | 20 |
| 10  | CYP1A1 molecular dynamics Simulation in 1 $\mu$ s.....                     | 21 |
| 11  | Model 6 Reactant of CYP1A2 molecular dynamics Simulation in 1 $\mu$ s..... | 22 |
| 12  | Comparison of CYP1A1 and CYP1A2 from Molecular Dynamics Simulation         | 23 |
| 13  | Scanning from quantum mechanics calculation.....                           | 30 |
| 14  | Energy data from quantum mechanics calculation .....                       | 31 |
| 15  | Energy data from quantum mechanics calculation with RRHO fixed.....        | 33 |
| 16  | Group charges and spin densities from quantum mechanics simulation .....   | 35 |
| 17  | Imaginary frequency data from quantum mechanics simulation .....           | 37 |
| 18  | Geometry data from quantum mechanics simulation.....                       | 37 |

## **1 Methodology**

### **1.1 Primary model preparation**

Here is the outline of the steps involved in preparing a structure for a molecular dynamics simulation as starting from a protein databank (PDB) file:

1. Select the PDB file: The first step was to select the enzyme for this study by fetching the data from rcsb.org<sup>1</sup>. The enzyme in this study was CYP1A2. We selected the chain A of 2HI4<sup>2</sup> PDB structure which was the latest released structure and with good resolution.
2. Clean the PDB file: The next step was to remove unnecessary residues (solvent, glycerol, ions) and/or ligands and ensuring that all residues were properly named and had their correct residue types (ATOM or HETATM). This was done using a text editor software and Chimera UCSF.
3. Add missing atoms: In this step, the heme-iron complex was modified to a Compound I (Cpd I) structure. The additional oxygen atom was added over the central iron atom with bond length 1.686 Å, which was a distance taken from a previous study using the quantum mechanics method<sup>3</sup>. This was customized using Chimera UCSF<sup>4</sup>.
4. Add hydrogen atoms: Once all of the missing atoms were corrected and presented in the PDB file, the hydrogen atoms were added using AmberTools 2018<sup>5</sup>.
5. Prepare the substrate: Melatonin was the substrate of this study. It was fetched from the ML1<sup>6</sup> PDB and reoptimized using a quantum mechanics method in Gaussian version 16<sup>7</sup>. The optimized structure was converted to a PDB file by the Antechamber<sup>8</sup> software package provided by AmberTools 2018.

### **1.2 Substrate docking**

Here is the outline of the steps involved in docking a substrate into the active site of the PDB file:

1. Prepare the receptor: The first step was to prepare the receptor, which was the well-prepared structure from section 1.1.
2. Prepare the ligand: The next step was to prepare the ligand, which was the small molecule that will be docked into the receptor, namely melatonin.
3. Select the docking software: In this study, we used AutoDock Vina<sup>9</sup> which uses a generic algorithm to search for the lowest energy configuration of a small molecule in the active site of a protein.
4. Set up the docking simulation: Once the receptor and ligand have been prepared, the next step was to set up the docking simulation. The size of the simulation box was 20.0626, 23.4102, 21.855 with the center coordinate at 5.74371, 17.7915, 17.8511. The box was placed at the center of the enzyme active site containing CpdI, the I helix, the G helix and the B' helix. The maximum energy difference between each search was set to 2 kcal/mol. The maximum number of binding modes was set to 10. This resulted in 10 binding poses which were further used for the molecular dynamics simulations.
5. Save different docked substrate poses: The ten low-energy binding poses of melatonin were separately saved as PDB files.

### 1.3 Molecular dynamics simulation

Here is the outline of the molecular dynamics simulations of the heme-iron complexes:

1. Prepare the mol2 files for non-standard molecules: Amber needs the information about non-standard chemical compounds which was in the mol2 file format. There are atom names, atom types, bond types, bond orders, etc. This was done using Antechamber.
2. Prepare the frcmod files for non-standard molecules: The forcefields for non-standard molecules were not available in Amber. This information can be prepared by converting data from mol2 file using parmchk2 software package provided in AmberTools 2018.
3. Generate forcefield for heme-iron complex: The atoms within 2.5 Å around the central iron atom in the porphyrin are optimized by quantum mechanics and the output was transferred to forcefield parameter. This was generated by MCPB.py<sup>10</sup> that was the python-based software package provided on Amber.
4. Solvate the protein: Once the force field for non-standard residues were generated, the whole system was solvated in water using the TIP3P<sup>11</sup> forcefield while the standard amino acids were performed by ff14SB<sup>12</sup> forcefield. The system was neutralized by Na<sup>+</sup> and Cl<sup>-</sup>. The rectangular solvate-box was set to a size of 10 Å, which was the distance between the box edges and the protein. This can be done using Amber's tleap software package.
5. Minimize the system: Once the system was solvated in water and neutralized, it was minimized to remove any bad contacts between the molecule and solvent. The steepest descent was set to 2000 with a cutoff set to 10 Å.
6. Heat the system: In this step, the system is heated up to bring the system into a more stable state. The system is heated up to a temperature of 310 K during a 10 ns simulation.
7. Run the MD production: Finally, the system was run for 100 ns for the general study and 1000 ns for the comparison of CYP1A1 and CYP1A2. It was run under the constant temperature and pressure condition at 310 K and 1 bar by running through multiple loops of 5 ns.
8. The calculations were run on different intermediates along the mechanisms for O-demethylation and aromatic hydroxylation. The labels of each data were presented in the following figure:

$$A_C^B$$

Where:

- A is the intermediate created, including reactant (Re), intermediate 1 (IM1), intermediate 2 (IM2), product (P).
- B is the reaction pathway, including O-demethylation (ODE) or aromatic hydroxylation (HYD).
- C is the model number as taken from the MD simulations that ranges from 1 to 10.

#### 1.4 Data extraction from molecular dynamics simulation

Once the molecular dynamics simulation was finished, all results from multiple loops were combined using the cpptraj software package provided on Amber and pytraj<sup>13</sup> which was python-based library. The data was in csv format and illustrated by the python libraries named plotly and seaborn. For the geometry visualization, it was presented by Chimera UCSF.

#### 1.5 Data selection of molecular dynamics simulation

Here is the outline of the data selection from the molecular dynamics simulations:

1. Compare the structure at the start and end of the molecular dynamics simulation: Focus on the protein changes and substrate-binding orientations of each system in the snapshots between 1 ns and 100 ns. The results are shown in Figure S1 to S6.
2. Determine the RMSD: The RMSD of each structure was extracted to see the stability of protein, substrate and heme in the molecular dynamics simulations. The results are shown in Figure S7 and S8.
3. Compare the RMSD from different intermediates: Each structure from 90 ns to 100 ns was used as the reference structure to calculate the RMSD of the next systems. For example, the snapshot at 90 ns of reactant was used to calculate the RMSD of 10 models from 1 ns to 100 ns. The RMSD of the comparison from 90 ns to 100 ns were presented in median values. The structure that mostly gave low RMSD was selected as the reference structure for quantum mechanics calculations. That structure was the model 6 of reactant. The results are shown in Figure S9 and S10.
4. Map the substrate in the active site: The substrate orientations were mapped into the quadrants based on the heme plane by measuring the C6 position of the substrate using the pyramid method. From the previous step, the snapshot of the selected reactant at the median that had highest density on x and y axis was selected. The selected snapshot of model 6 reactant was 80.4 ns. The results are shown in Figure S11 and S12.

#### 1.6 Modification of small model for quantum mechanics simulation

The amino acids within 5 Å of the melatonin are reported in Figure S13 with the distributions of amino acids. Those residues are included in the active site cluster model for which quantum mechanics calculation were performed. However, some residues or side chains had to be truncated because of the size limitation of the quantum mechanics calculation. The truncated model had 283 atoms. The result is shown in Figure S14.

#### 1.7 Quantum mechanics simulation

The quantum mechanics calculation was performed with Gaussian version 16 by the following steps:

1. Optimize cluster models and local minima: The modified small model was optimized with basis set 1 (BS1) and the UB3LYP density functional approach. The iron (Fe) atom was described with the LANL2DZ+ECP basis set and the rest of the atoms employed 6-31G\*. Calculations were performed at 298.15 K (25°C) in the doublet and quartet spin multiplicities and overall charge -2.
2. Geometry scans for describing specific chemical reaction pathways: The atoms involved in the O-demethylation and aromatic hydroxylation were moved closer to the oxo group by constraint geometry scans were the O-H/C-O distances



were shortened in a stepwise manner. Each step had fixed O-H/C-O distance and applied a full geometry optimization. During this process the electronic energy changed and followed past a maximum and leading to another local minimum. The scan was run until the next local minimum was reached using the computational methods as described in (1).

3. Optimize transition state: The structure at the maximum energy point was reoptimized as a transition state and with basis set BS1 with the same conditions as in (1).
4. Perform better basis set calculations: The optimized structures were subjected to the single point calculation with basis set 2 (BS2) and the UB3LYP density functional. The iron (Fe) atom was described with cc-pVTZ and the rest of the atoms with a 6-311++G\* basis set. Energies were calculated at 298.15 K (25°C) in the doublet and quartet spin multiplicities and with overall charge -2.
5. Generate energy data: The optimized structures were confirmed as local minima or first-order saddle points with a frequency calculation with BS1 under the same condition in (1) resulting in energy data including zero-point energy, electronic energy, free energy, etc.
6. The vibrational frequencies obtained from Gaussian were corrected with the Goodvibes<sup>15</sup> software package. The calculated energy was added by the approximation for the quasi-harmonic enthalpy correction. It replaced harmonic energy contributions with a quasi-RRHO vibrational energy term via the Head-Gordon expression at the 298.15 K and 1 atm.

### 1.8 Chemical reaction determination of quantum mechanics simulation

Here is the outline of the chemical reactions determined by quantum mechanics calculations:

1. Extract energy data: The thermochemistry data was extracted and includes zero-point energy, electronic energy, electronic energy with zero-point energy and free energy. The chemical reaction energies were determined from relative energies which were derived from absolute free energies.
2. Illustrate energy profile: To give the insight of chemical reaction, the energy profile was created from the relative energies from BS2 single point calculation using Chemdraw<sup>14</sup> software.
3. Extract charges and spin densities: The electron configurations and orbitals were determined by charges and spin densities.
4. Extract geometry data: Geometry information presented the positions of the atoms relative to doublet and quartet multiplicities. The geometry data including bond lengths, angles and dihedrals were extracted by a python-based library.
5. Extract imaginary frequencies: The imaginary frequency relates to the activation energy that is required to overcome the energy barrier and initiate a chemical reaction. It was extracted by data mining using python.

## 2 Reference

1. Berman, H. M.; Westbrook, J.; Feng, Z.; Gilliland, G.; Bhat, T. N.; Weissig, H.; Shindyalov, I. N.; Bourne, P. E. The Protein Data Bank. *Nucleic Acids Research* **2000**, 28 (1), 235-242.
2. Sansen, S.; Yano, J. K.; Reynald, R. L.; Schoch, G. A.; Griffin, K. J.; Stout, C. D.; Johnson, E. F. Adaptations for the oxidation of polycyclic aromatic hydrocarbons exhibited by the structure of human P450 1A2. *J Biol Chem* **2007**, 282 (19), 14348-55.
3. Mokkawas, T.; Lim, Z. Q.; de Visser, S. P. Mechanism of Melatonin Metabolism by CYP1A1: What Determines the Bifurcation Pathways of Hydroxylation versus Deformylation? *The Journal of Physical Chemistry B* **2022**, 126 (46), 9591-9606.
4. Pettersen, E. F.; Goddard, T. D.; Huang, C. C.; Couch, G. S.; Greenblatt, D. M.; Meng, E. C.; Ferrin, T. E. UCSF Chimera--a visualization system for exploratory research and analysis. *J Comput Chem* **2004**, 25 (13), 1605-1612.
5. Case, D. A.; Cheatham, T. E., 3rd; Darden, T.; Gohlke, H.; Luo, R.; Merz, K. M., Jr.; Onufriev, A.; Simmerling, C.; Wang, B.; Woods, R. J. The Amber biomolecular simulation programs. *J Comput Chem* **2005**, 26 (16), 1668-88.
6. Sliwiak, J.; Sikorski, M.; Jaskolski, M. PR-10 proteins as potential mediators of melatonin-cytokinin cross-talk in plants: crystallographic studies of LIPR-10.2B isoform from yellow lupine. *The FEBS Journal* [<https://doi.org/10.1111/febs.14455>] **2018**, 285 (10), 1907-1922.
7. Frisch, M. J.; Trucks, G. W.; Schlegel, H. B.; Scuseria, G. E.; Robb, M. A.; Cheeseman, J. R.; Scalmani, G.; Barone, V.; Petersson, G. A.; Nakatsuji, H.; Li, X.; Caricato, M.; Marenich, A. V.; Bloino, J.; Janesko, B. G.; Gomperts, R.; Mennucci, B.; Hratchian, H. P.; Ortiz, J. V.; Izmaylov, A. F.; Sonnenberg, J. L.; Williams, Ding, F.; Lipparini, F.; Egidi, F.; Goings, J.; Peng, B.; Petrone, A.; Henderson, T.; Ranasinghe, D.; Zakrzewski, V. G.; Gao, J.; Rega, N.; Zheng, G.; Liang, W.; Hada, M.; Ehara, M.; Toyota, K.; Fukuda, R.; Hasegawa, J.; Ishida, M.; Nakajima, T.; Honda, Y.; Kitao, O.; Nakai, H.; Vreven, T.; Throssell, K.; Montgomery Jr., J. A.; Peralta, J. E.; Ogliaro, F.; Bearpark, M. J.; Heyd, J. J.; Brothers, E. N.; Kudin, K. N.; Staroverov, V. N.; Keith, T. A.; Kobayashi, R.; Normand, J.; Raghavachari, K.; Rendell, A. P.; Burant, J. C.; Iyengar, S. S.; Tomasi, J.; Cossi, M.; Millam, J. M.; Klene, M.; Adamo, C.; Cammi, R.; Ochterski, J. W.; Martin, R. L.; Morokuma, K.; Farkas, O.; Foresman, J. B.; Fox, D. J. *Gaussian 16 Rev. C.01*, Wallingford, CT, 2016.
8. Wang, J.; Wang, W.; Kollman, P.; Case, D. ANTECHAMBER: an accessory software package for molecular mechanical calculations. *Journal of Chemical Information and Computer Sciences - JCISD* **2000**, 222.
9. Trott, O.; Olson, A. J. AutoDock Vina: improving the speed and accuracy of docking with a new scoring function, efficient optimization, and multithreading. *J Comput Chem* **2010**, 31 (2), 455-61.
10. Li, P.; Merz, K. M., Jr. MCPB.py: A Python Based Metal Center Parameter Builder. *Journal of Chemical Information and Modeling* **2016**, 56 (4), 599-604.
11. Price, D. J.; Brooks, C. L. A modified TIP3P water potential for simulation with Ewald summation. *The Journal of Chemical Physics* **2004**, 121 (20), 10096-10103.
12. Maier, J. A.; Martinez, C.; Kasavajhala, K.; Wickstrom, L.; Hauser, K. E.; Simmerling, C. ff14SB: Improving the Accuracy of Protein Side Chain and Backbone Parameters from ff99SB.

*Journal of Chemical Theory and Computation* **2015**, 11 (8), 3696-3713.

13. Roe, D. R.; Cheatham, T. E., III. PTRAJ and CPPTRAJ: Software for Processing and Analysis of Molecular Dynamics Trajectory Data. *Journal of Chemical Theory and Computation* **2013**, 9 (7), 3084-3095.

14. ChemDraw professional.

15. Luchini, G.; Alegre-Requena, J. V.; Funes-Ardoiz, I.; Paton, R. S. F1000Research, 2020, 9, 291.

GoodVibes version 2.0.3 DOI: 10.5281/zenodo.1435820.

### 3 Binding poses of CYP1A2 systems from molecular dynamics simulation

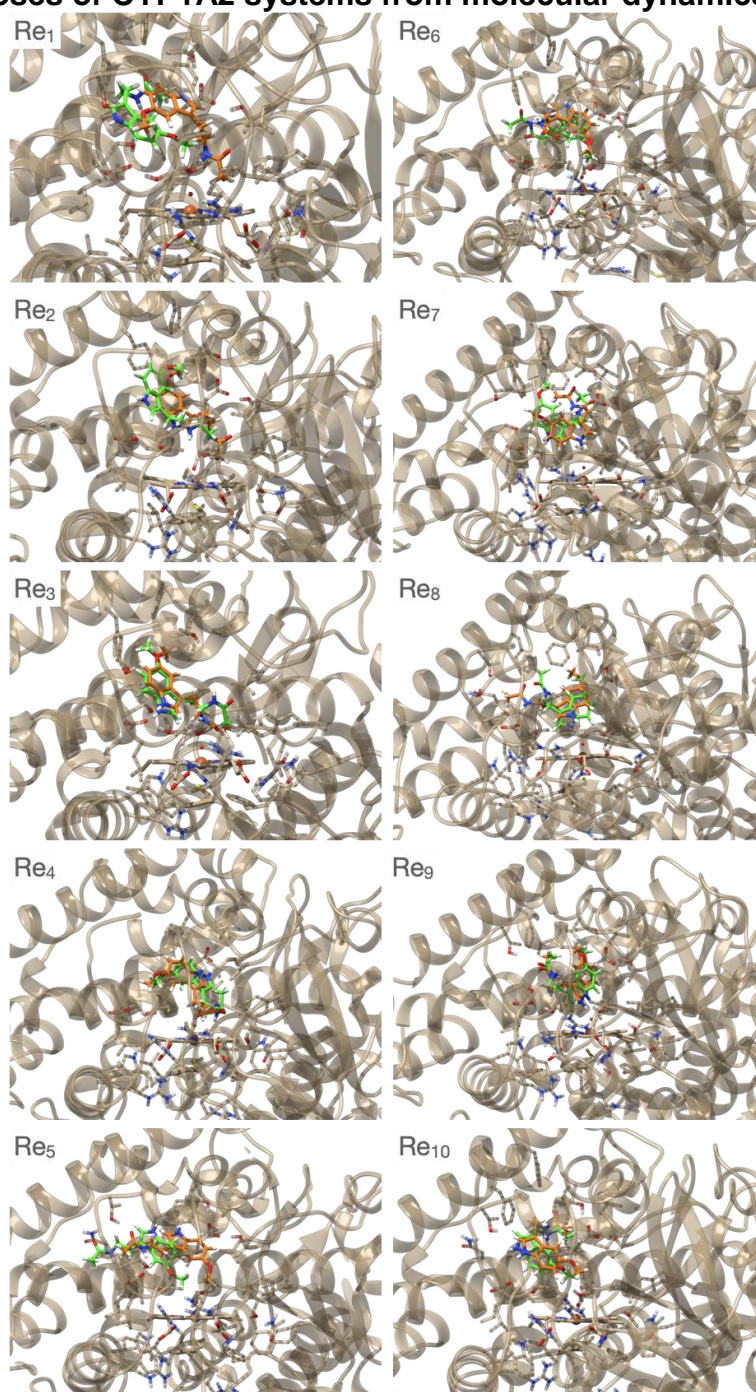

**Figure S1** Binding poses of the reactant complex as obtained from 10 MD simulations of 10 different starting orientations of substrate. The substrate orientation structures at 1 and 100 ns are presented in orange and green.



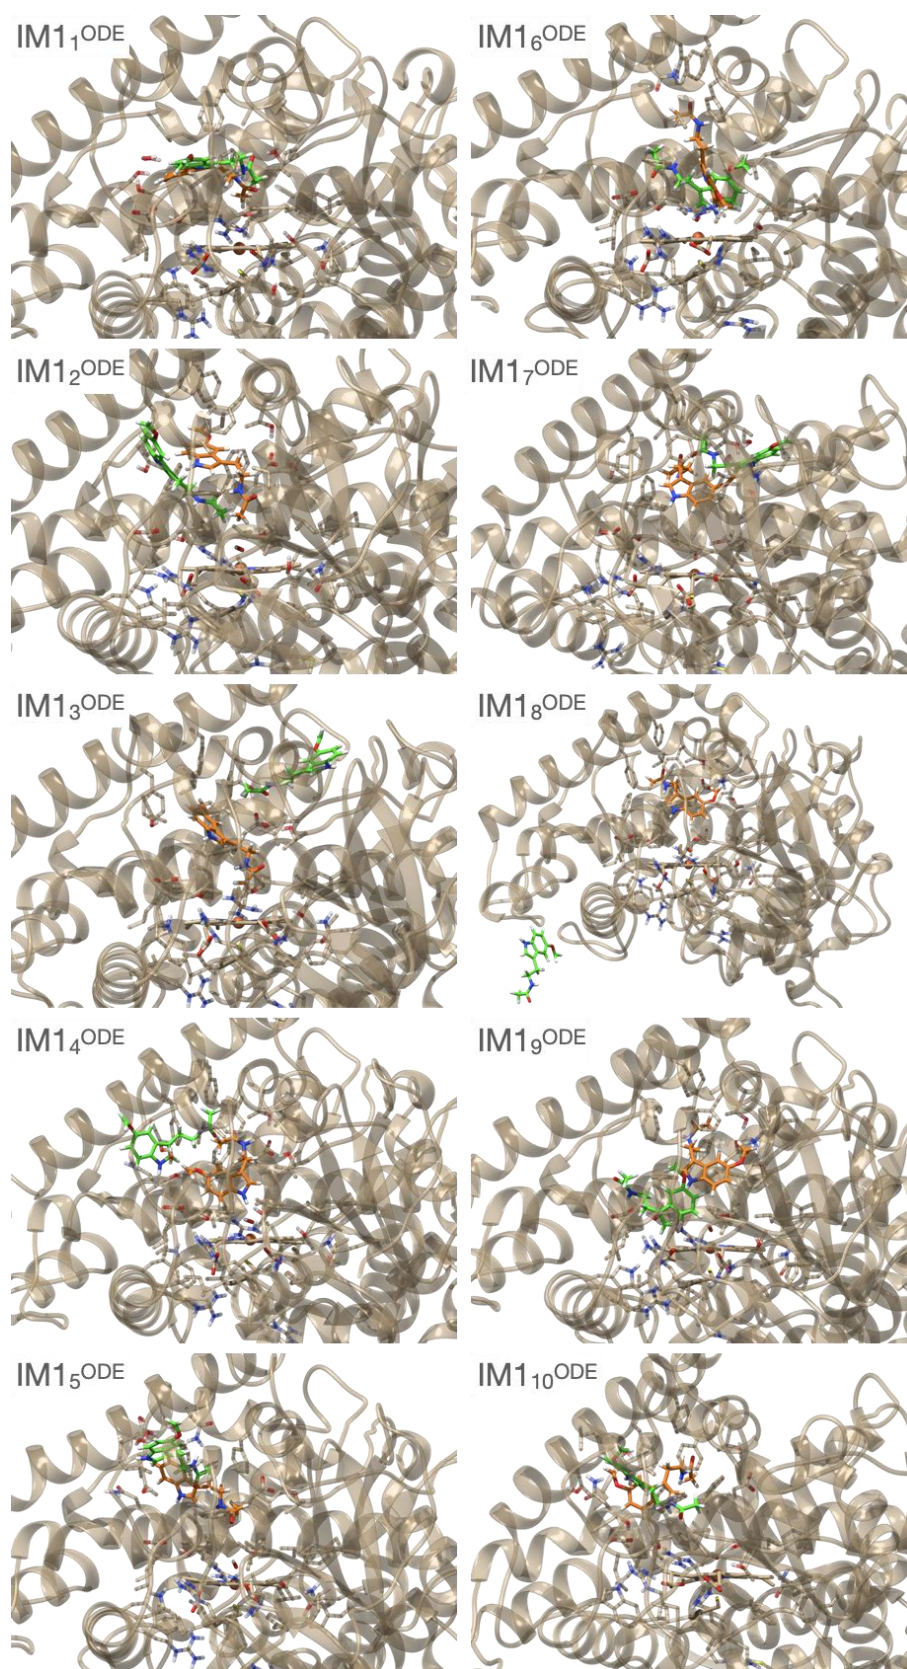

**Figure S2** Binding poses of the substrate in intermediate-1 along the O-demethylation pathway in 10 models as obtained from MD simulations. Structures at 1 and 100 ns are presented in orange and green.



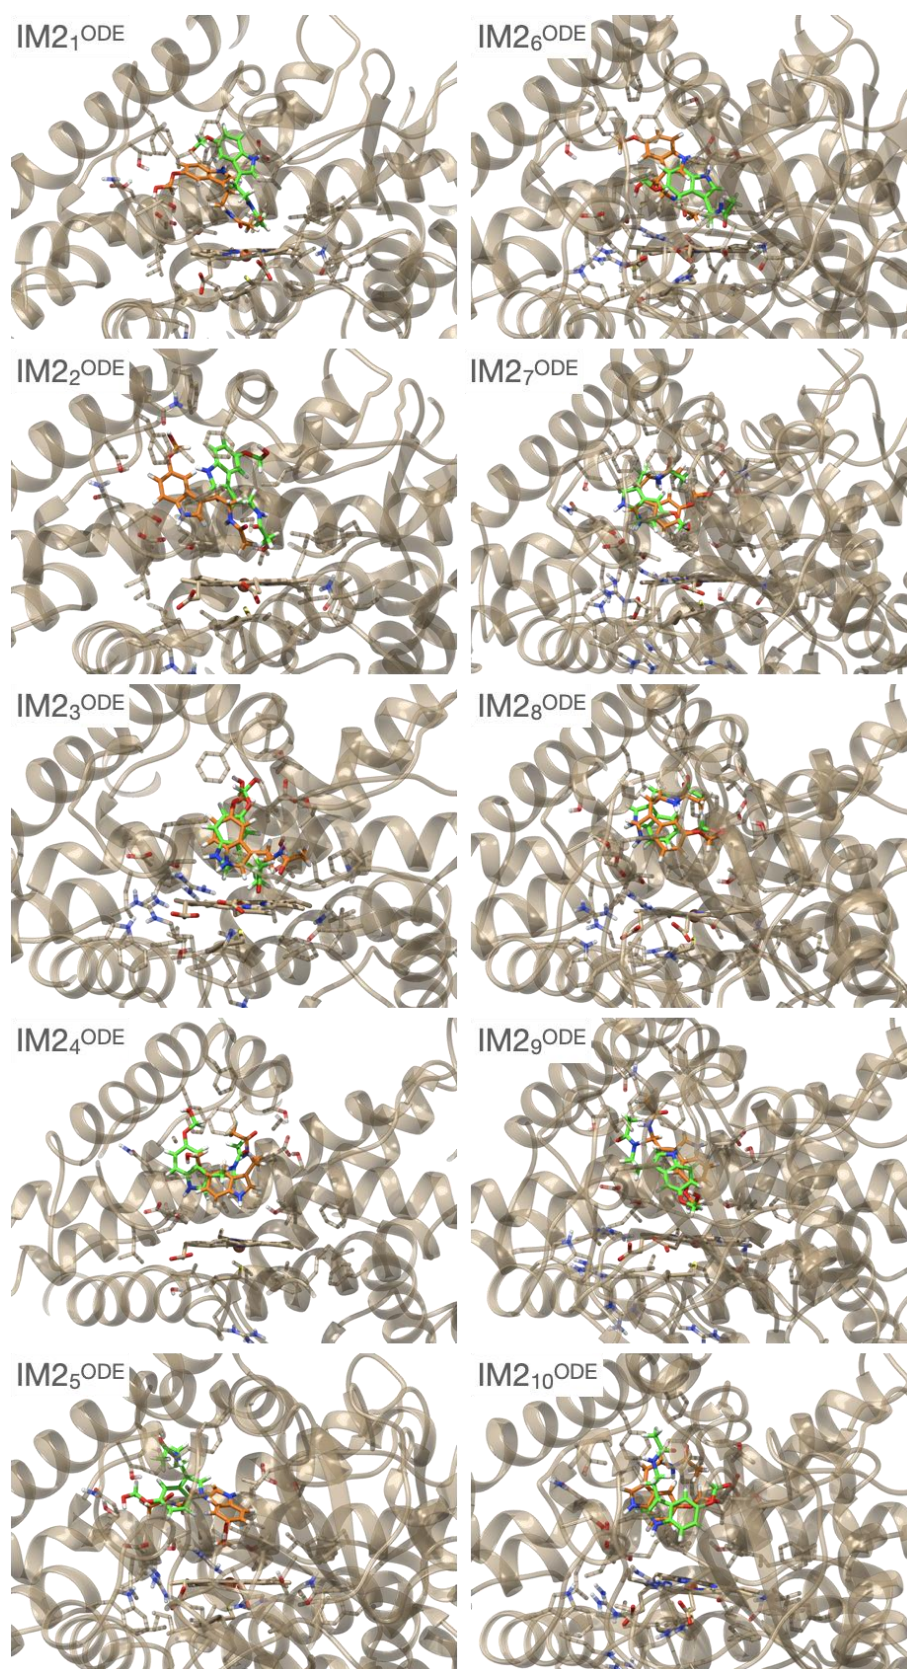

**Figure S3** Binding poses of the substrate in intermediate-2 along the O-demethylation pathway in 10 models as obtained from MD simulations. Structures at 1 and 100 ns are presented in orange and green.



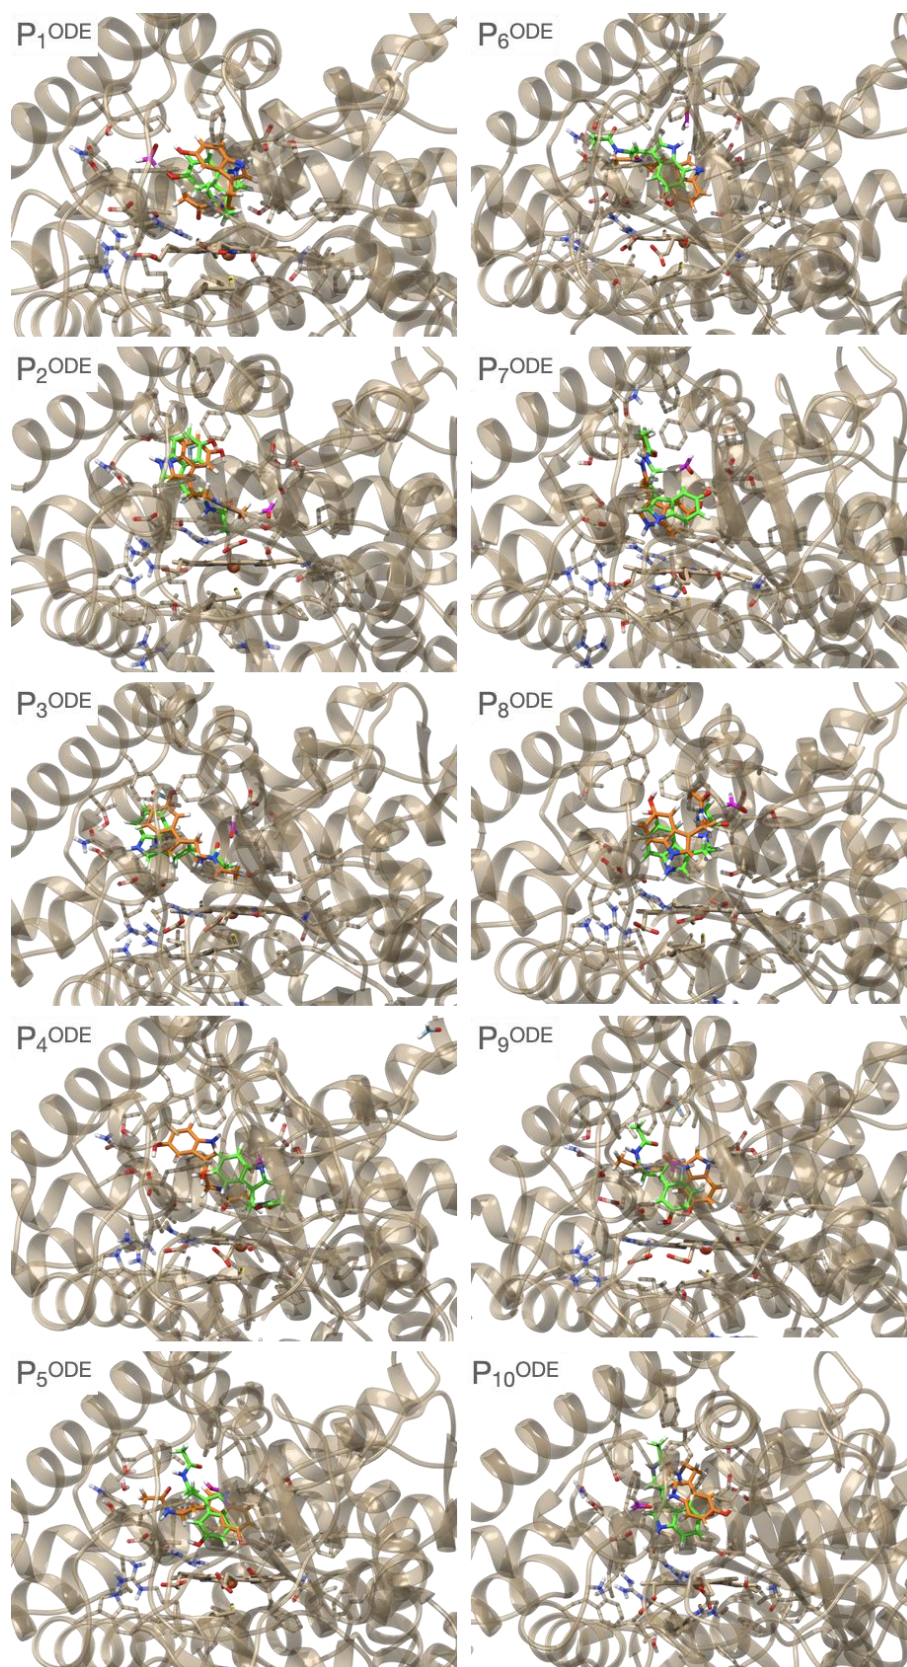

**Figure S4** Binding poses of the substrate in product along the O-demethylation pathway in 10 models as obtained from MD simulations. Structures at 1 and 100 ns are presented in orange and green.

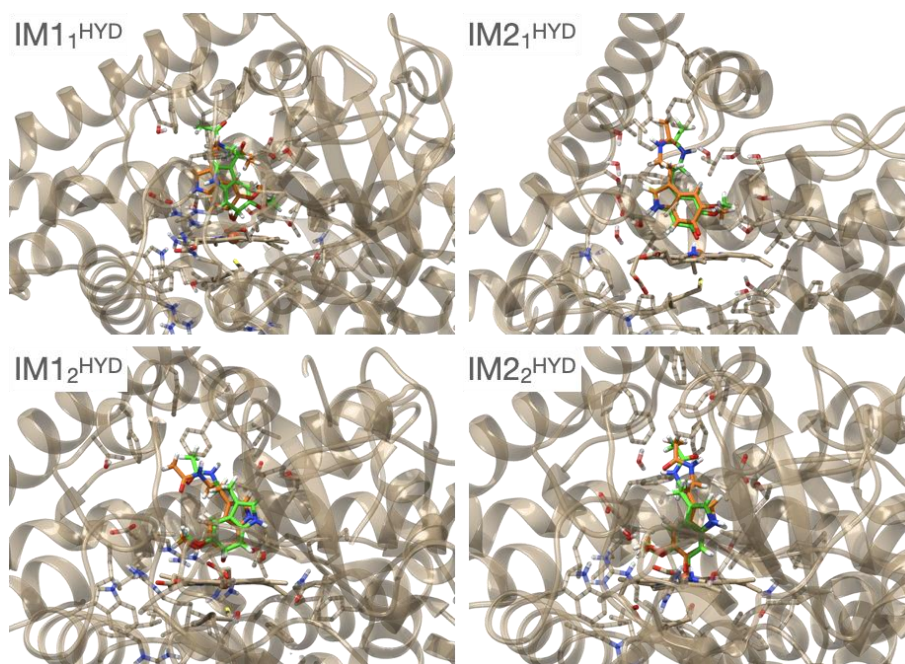

**Figure S5** Binding poses of the substrate in intermediate-1 and intermediate-2 along the aromatic hydroxylation pathway in 2 models as obtained from MD simulations. Structures at 1 and 100 ns are presented in orange and green.



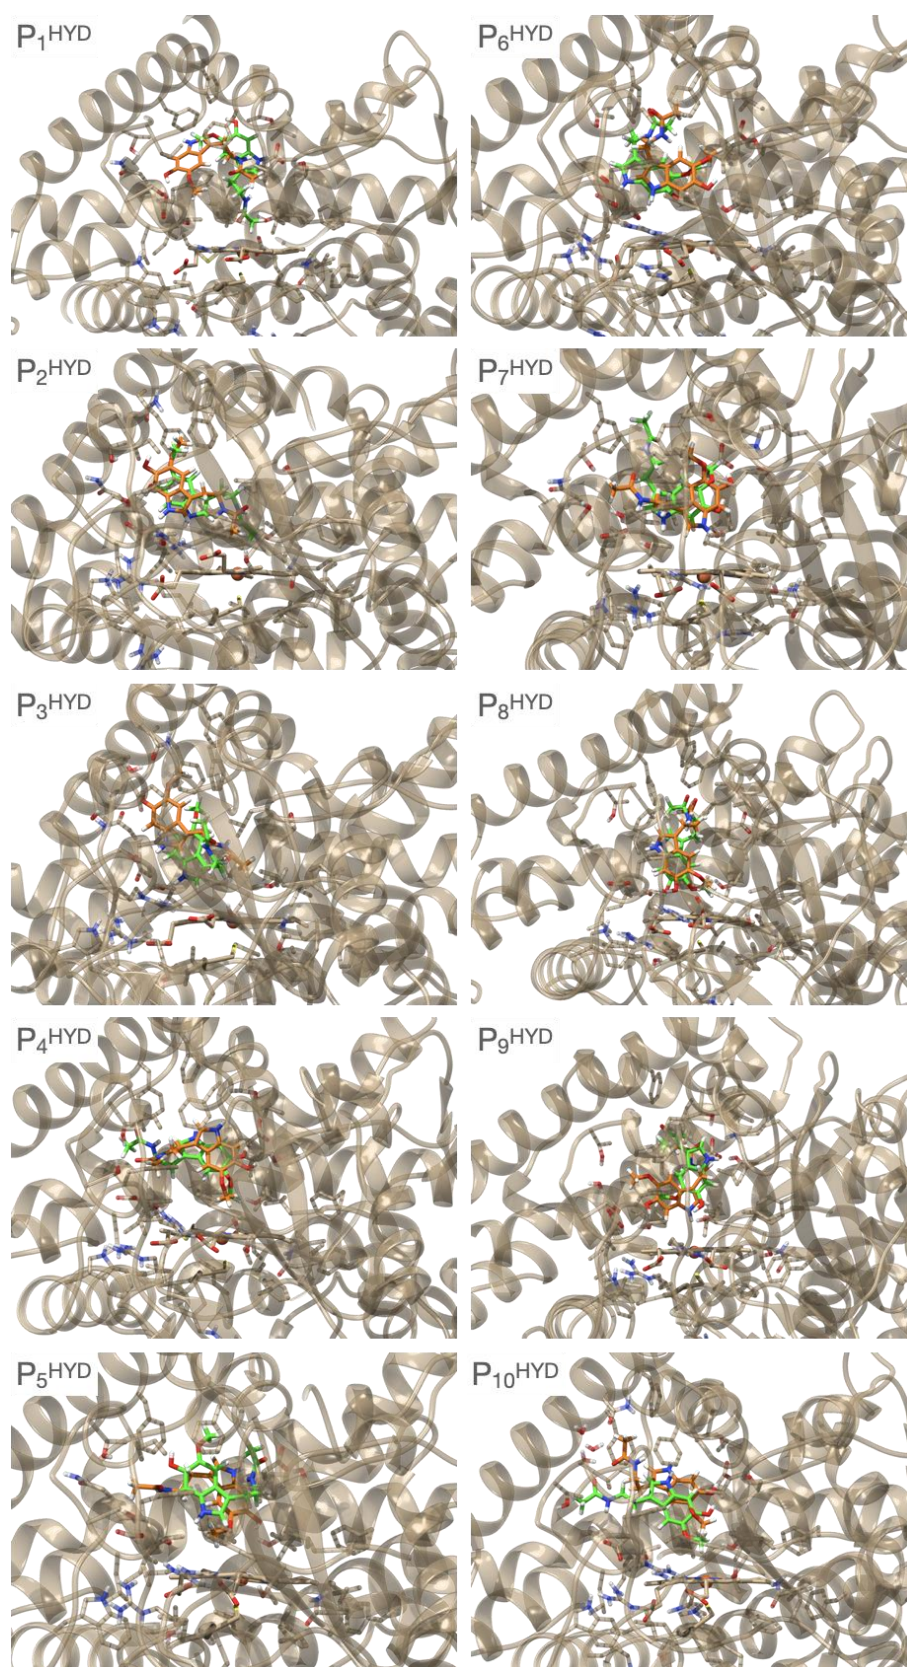

**Figure S6** Binding poses of the substrate in product along the aromatic hydroxylation pathway in 10 models as obtained from MD simulations. Structures at 1 and 100 ns are presented in orange and green.

## 4 RMSD of CYP1A1 systems

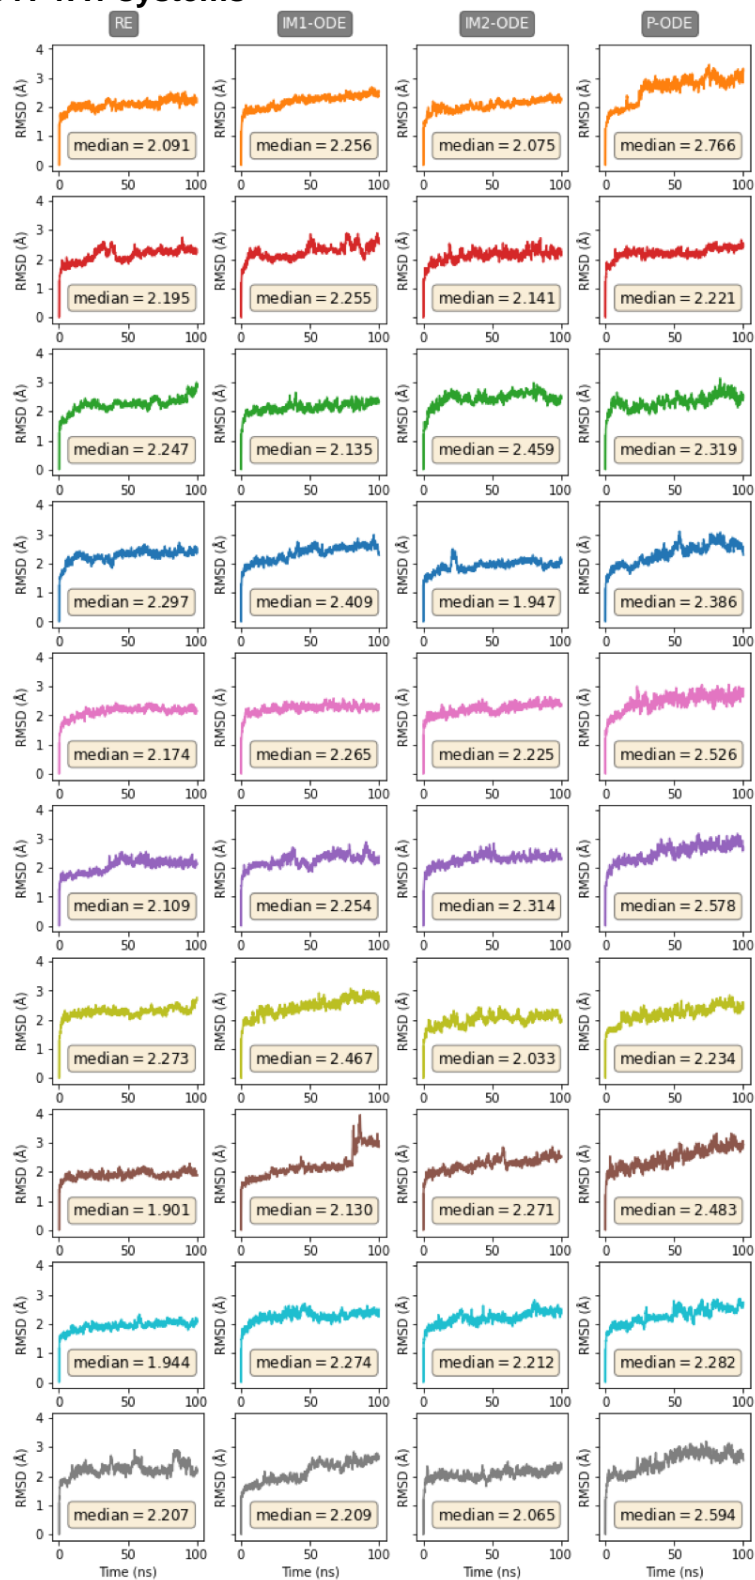

**Figure S7** RMSD values of the protein for the MD simulations of various intermediates along the pathway for O-demethylation in 100 ns.

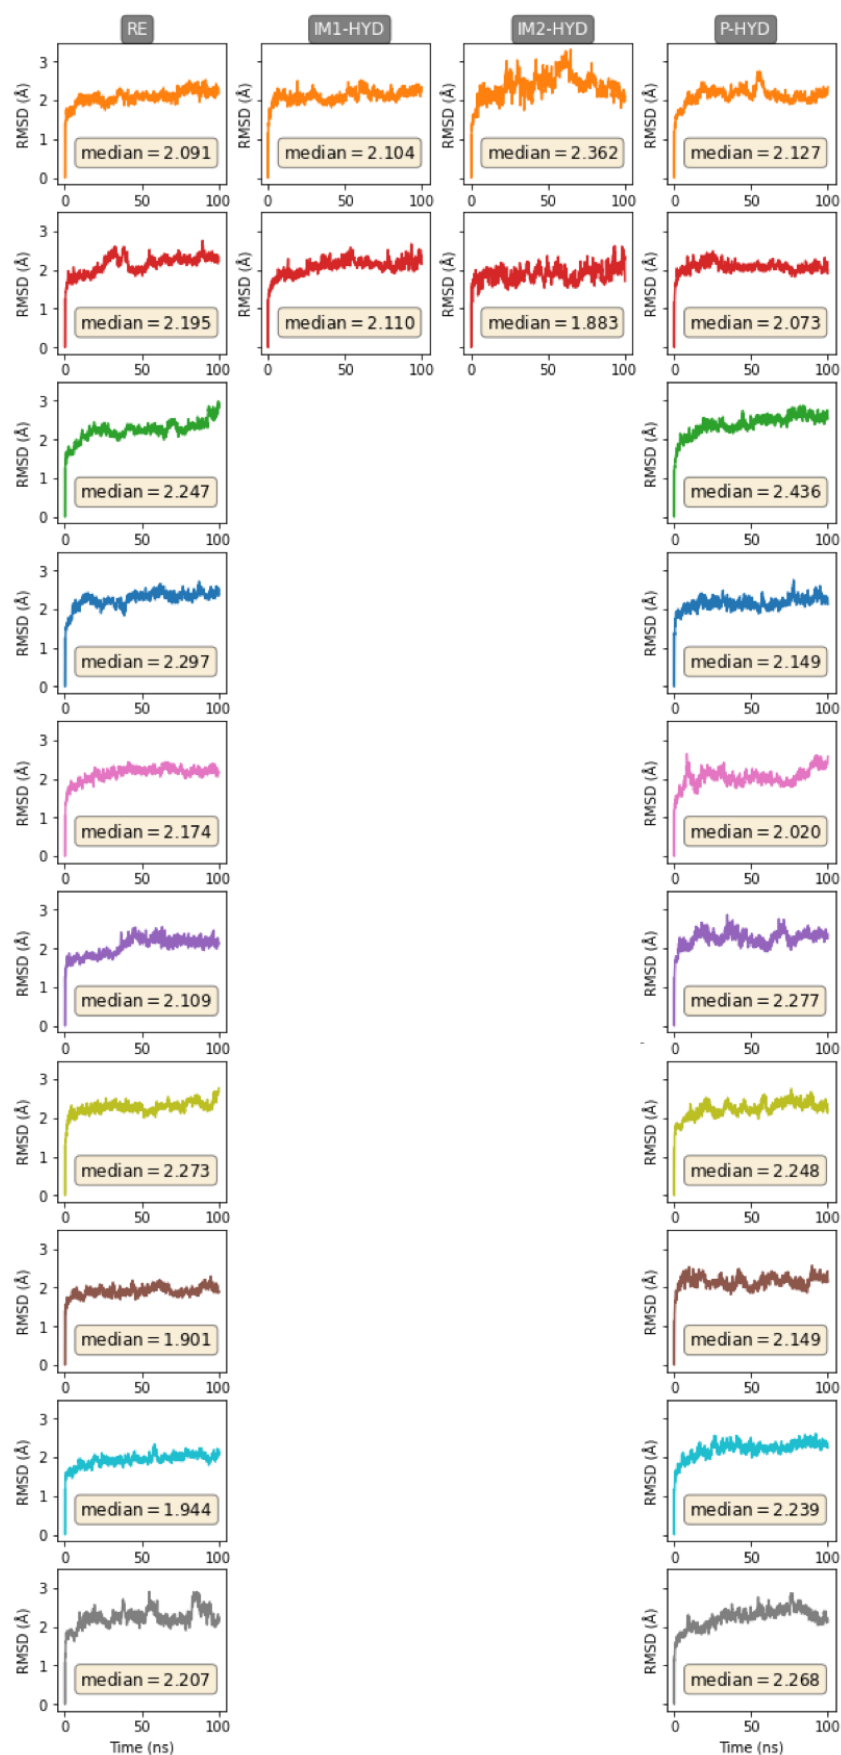

**Figure S8** RMSD values of the protein for the MD simulations of various intermediates along the pathway for aromatic hydroxylation in 100 ns.

## 5 RMSD matching for different CYP1A2 systems

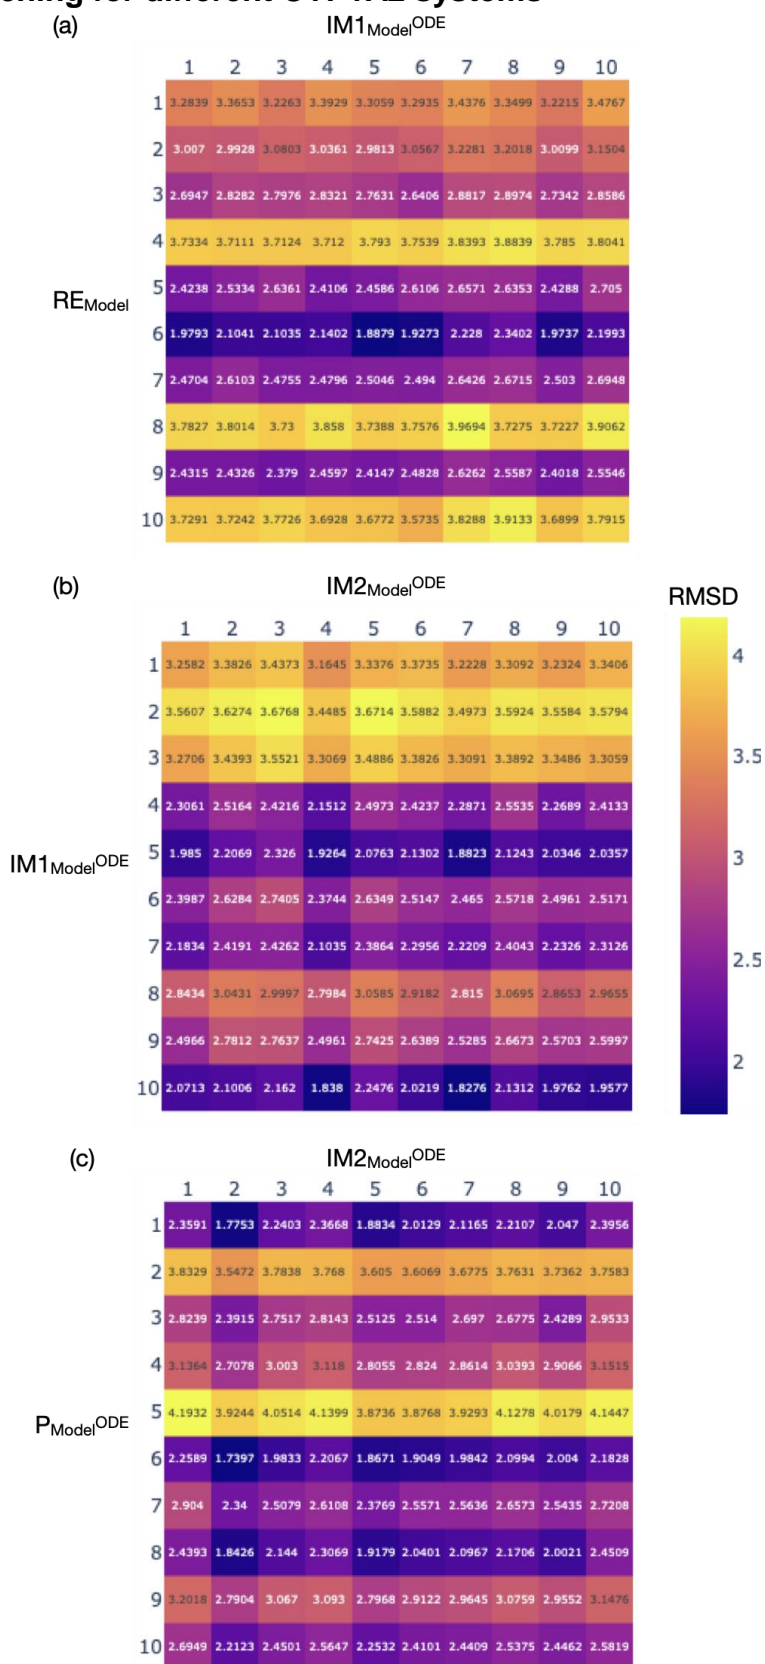

**Figure S9** RMSD comparison of intermediate states for O-demethylation during a 100 ns MD simulation.



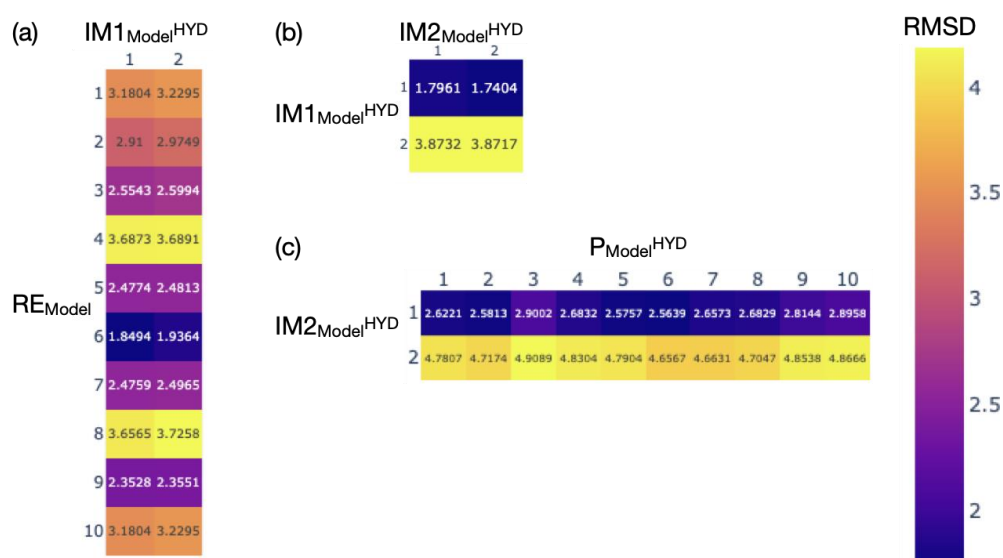

**Figure S10** RMSD comparison of intermediate states for aromatic hydroxylation during a 100 ns MD simulation.

## 6 Substrate location in the active sites

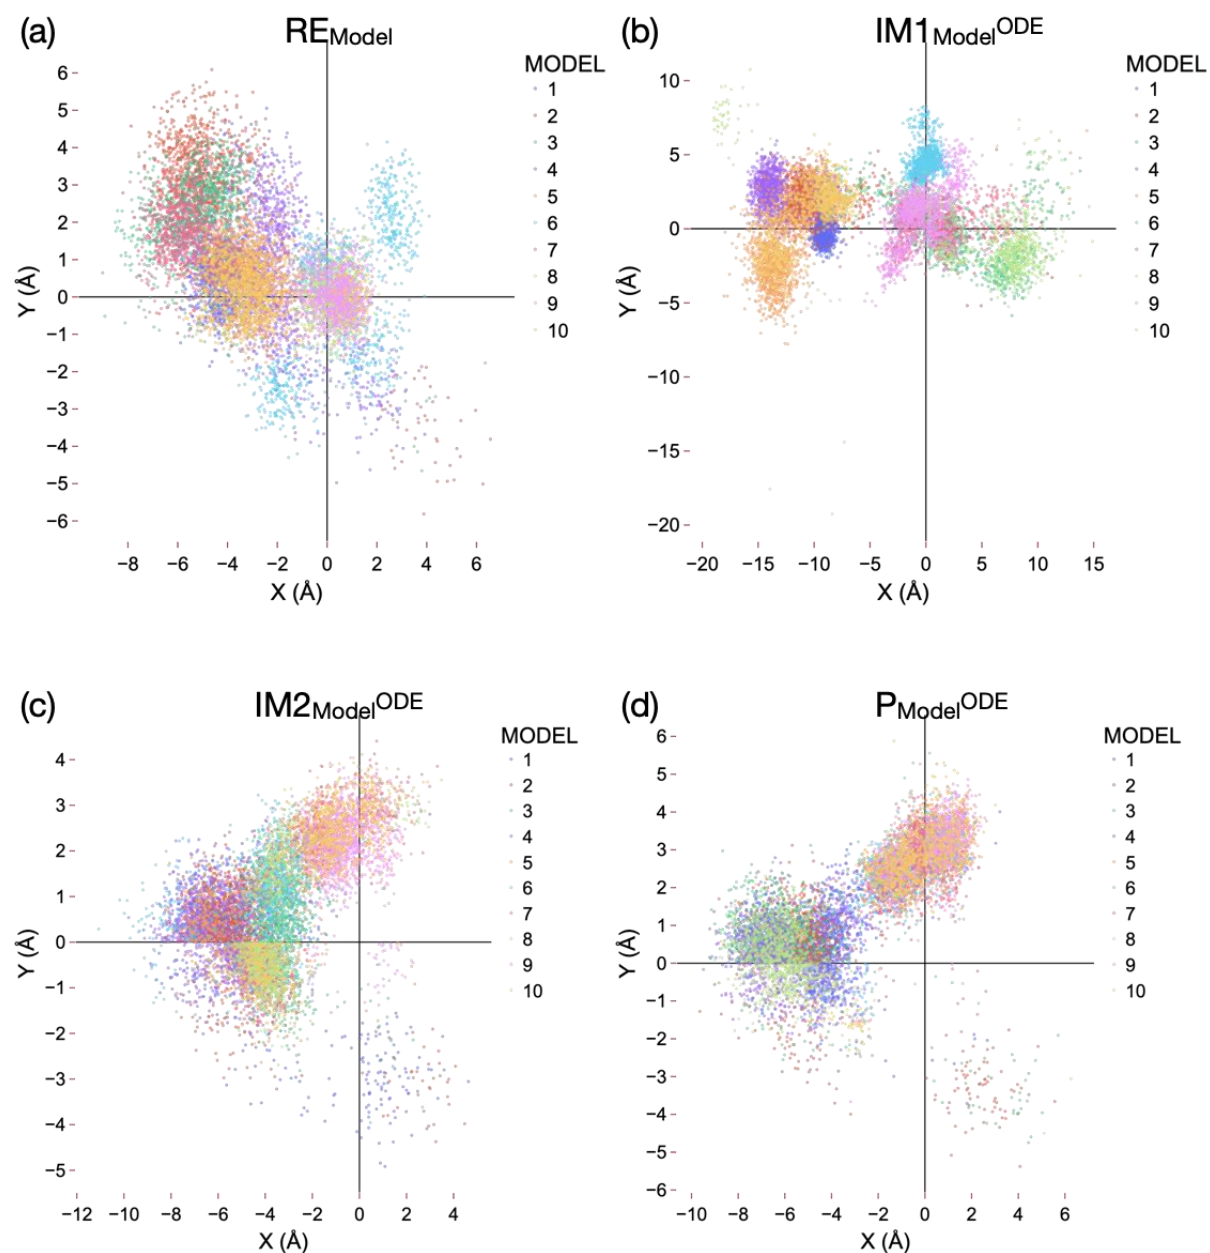

**Figure S11** Substrate mapping in the active site in intermediates along the mechanism for O-demethylation as obtained from a 100 ns MD simulation.

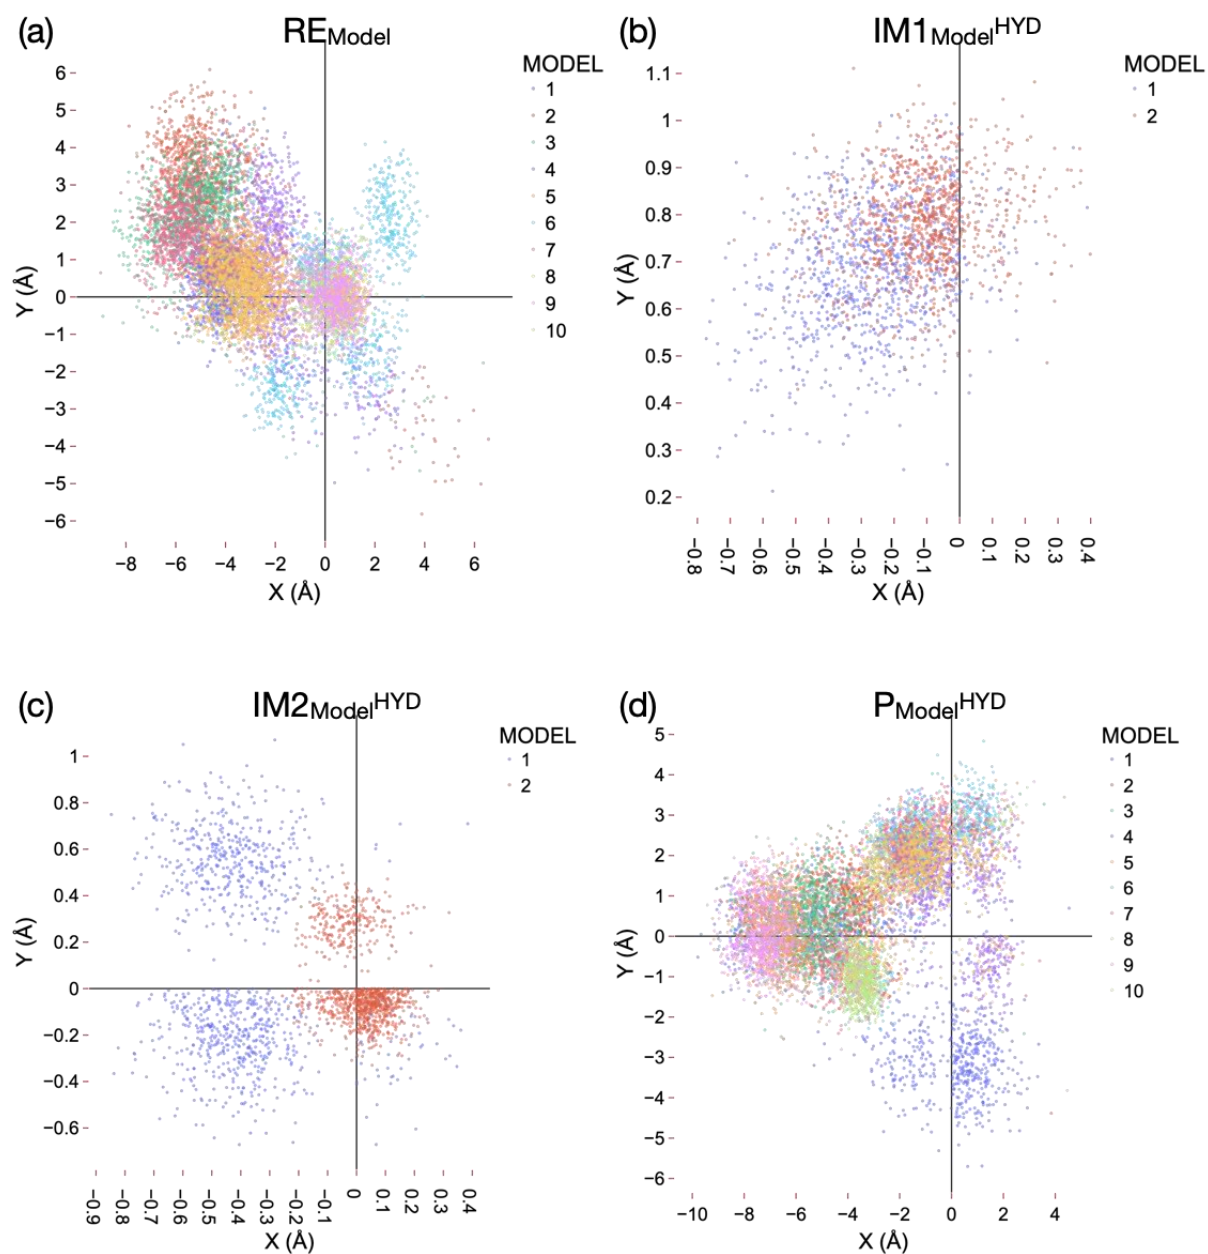

**Figure S12** Substrate mapping in the active site in intermediates along the mechanism for aromatic hydroxylation as obtained from a 100 ns MD simulation.

## 7 Amino acid distributions

(a)

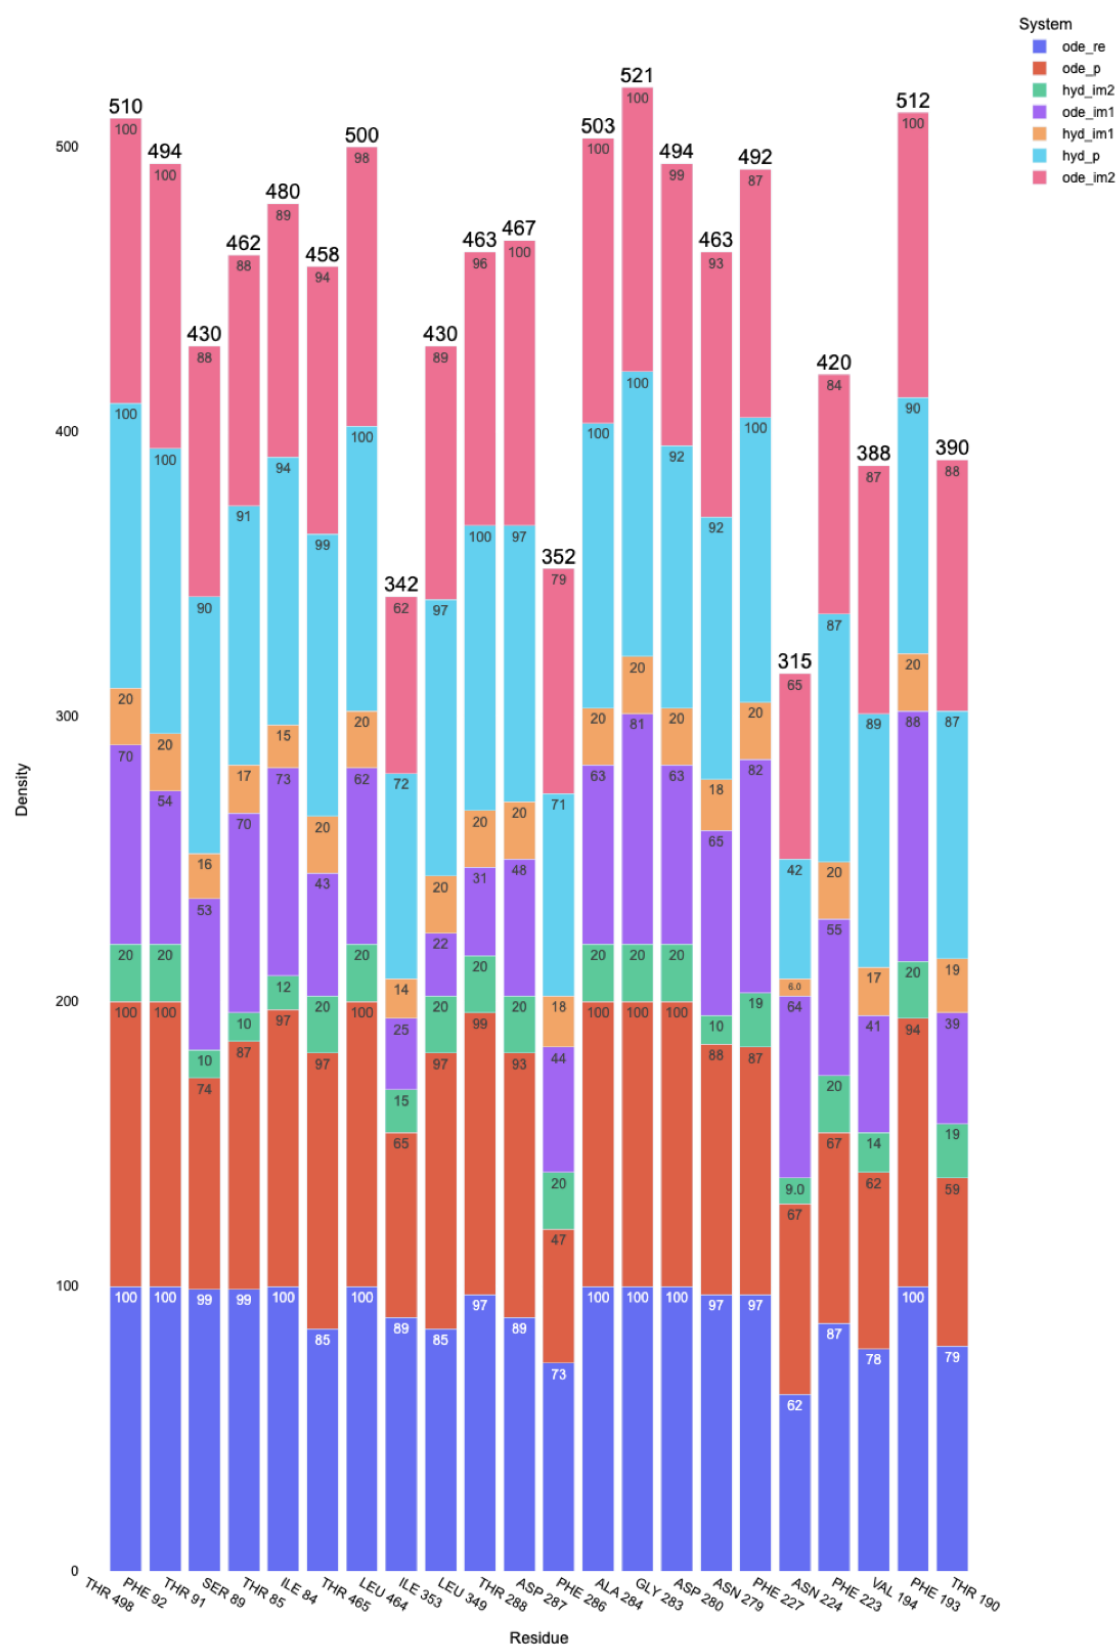

**Figure S13** Amino acid distributions within 5 Å around the melatonin as derived from snapshot structures from MD simulations.



## 8 Linear interaction energy of 10 reactant models of CYP1A2

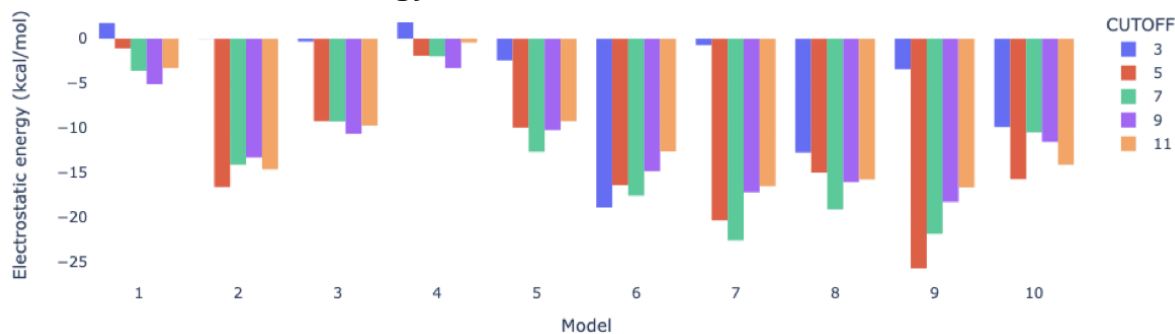

**Figure S14** Linear interaction energy of the 10 reactant models as obtained from the CYP1A2 MD simulations.

## 9 Active site cluster of quantum mechanics simulation

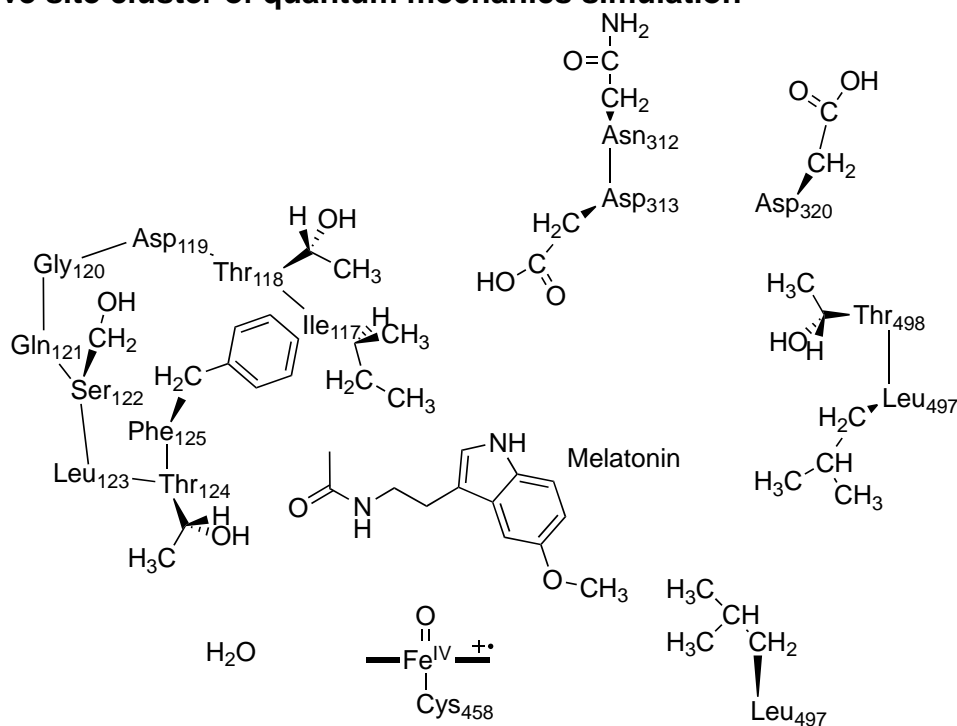

**Figure S15** QM active site cluster of 283 atoms used in this work. It was selected from RE<sub>6</sub> at the lowest total energy (80.4 ns).

## 10 CYP1A1 molecular dynamics Simulation in 1 $\mu$ s

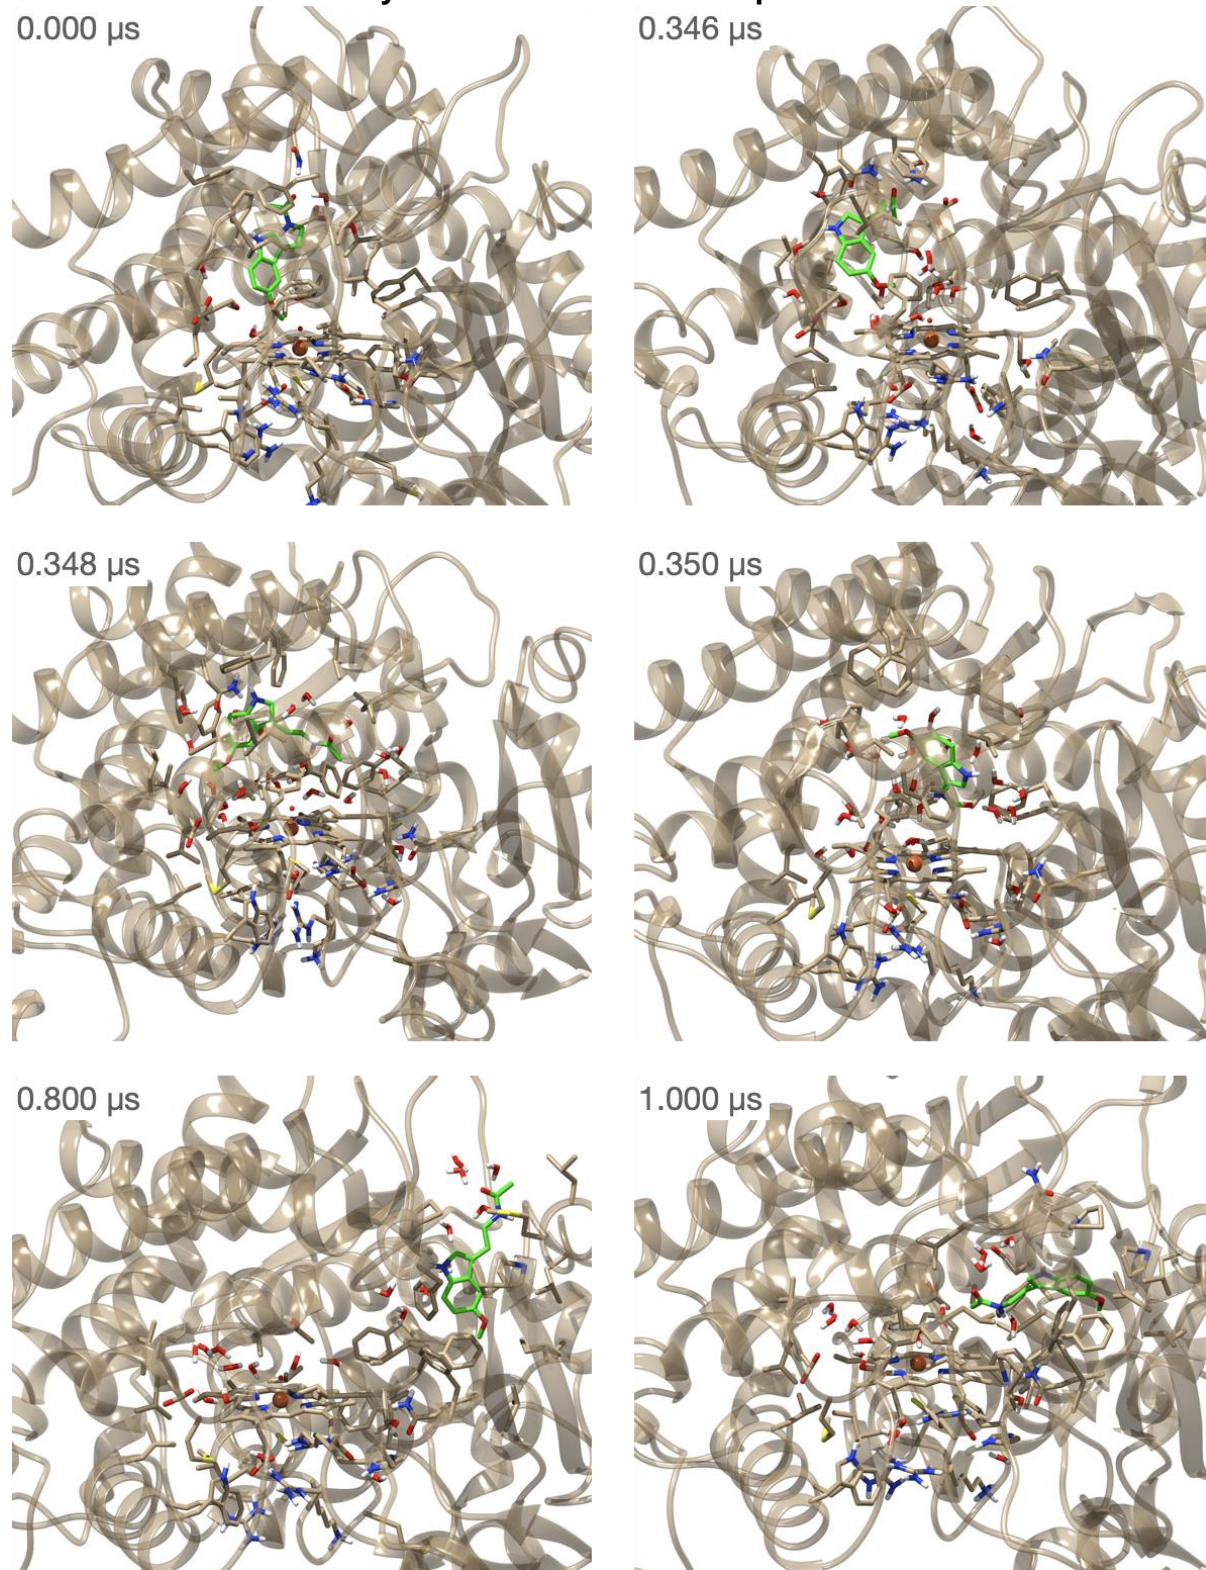

**Figure S16** Binding poses of the substrate in the reactant complex in CYP1A1 as obtained from MD simulations. The starting structure was taken from Model 3 of Mekkawes et al (J. Phys. Chem. A 2022).



### 11 Model 6 Reactant of CYP1A2 molecular dynamics Simulation in 1 $\mu$ s

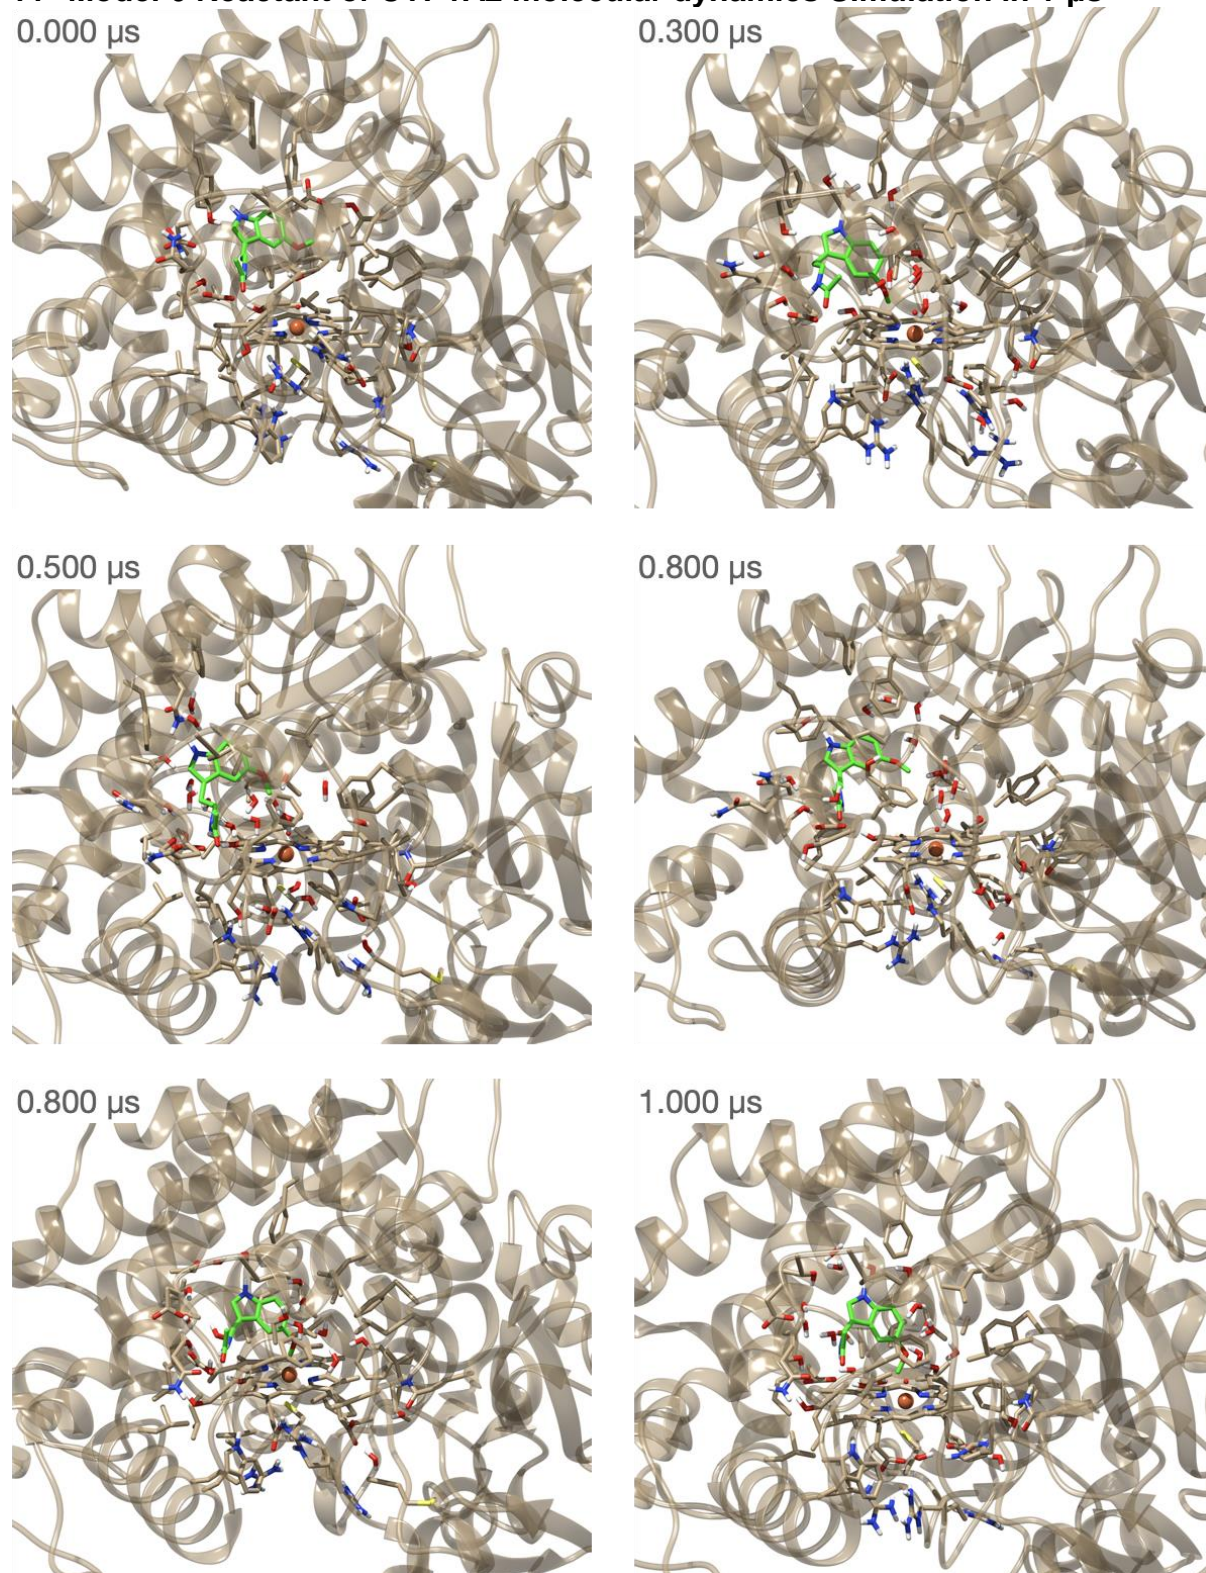

**Figure S17** Binding poses of the substrate in the reactant complex in CYP1A1 as obtained from MD simulations. The starting structure was taken from Model 6 of the reactant complex discussed above.



## 12 Comparison of CYP1A1 and CYP1A2 from Molecular Dynamics Simulation

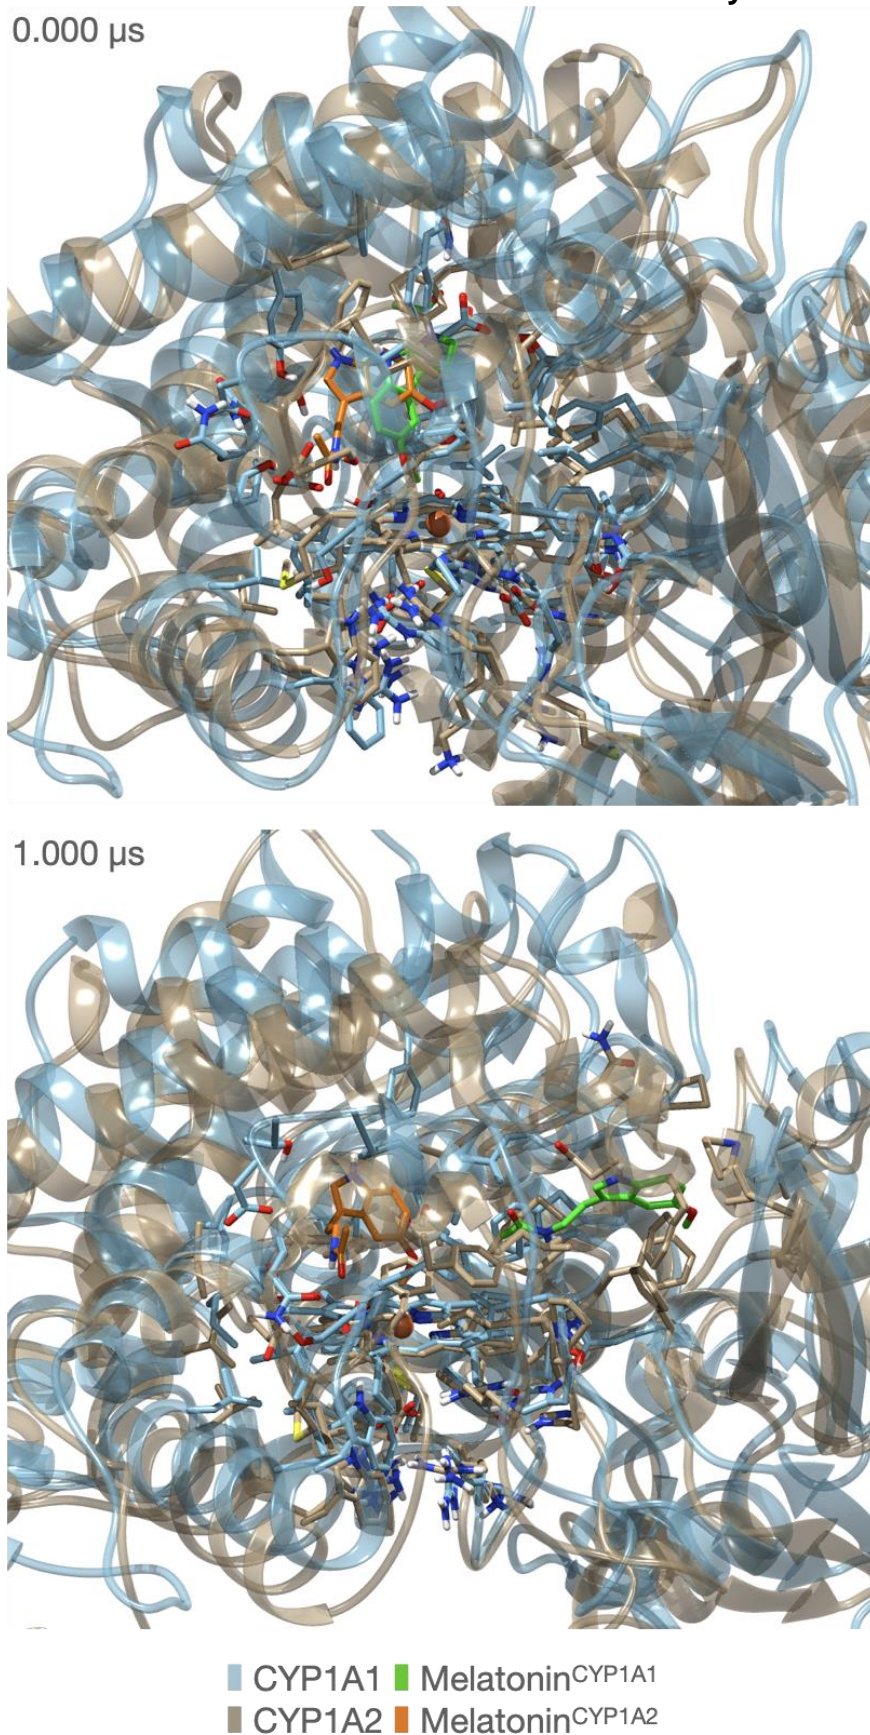

**Figure S18** Overlay of the start and end point structures of the 1  $\mu\text{s}$  MD simulation for CYP1A1 and CYP1A2.

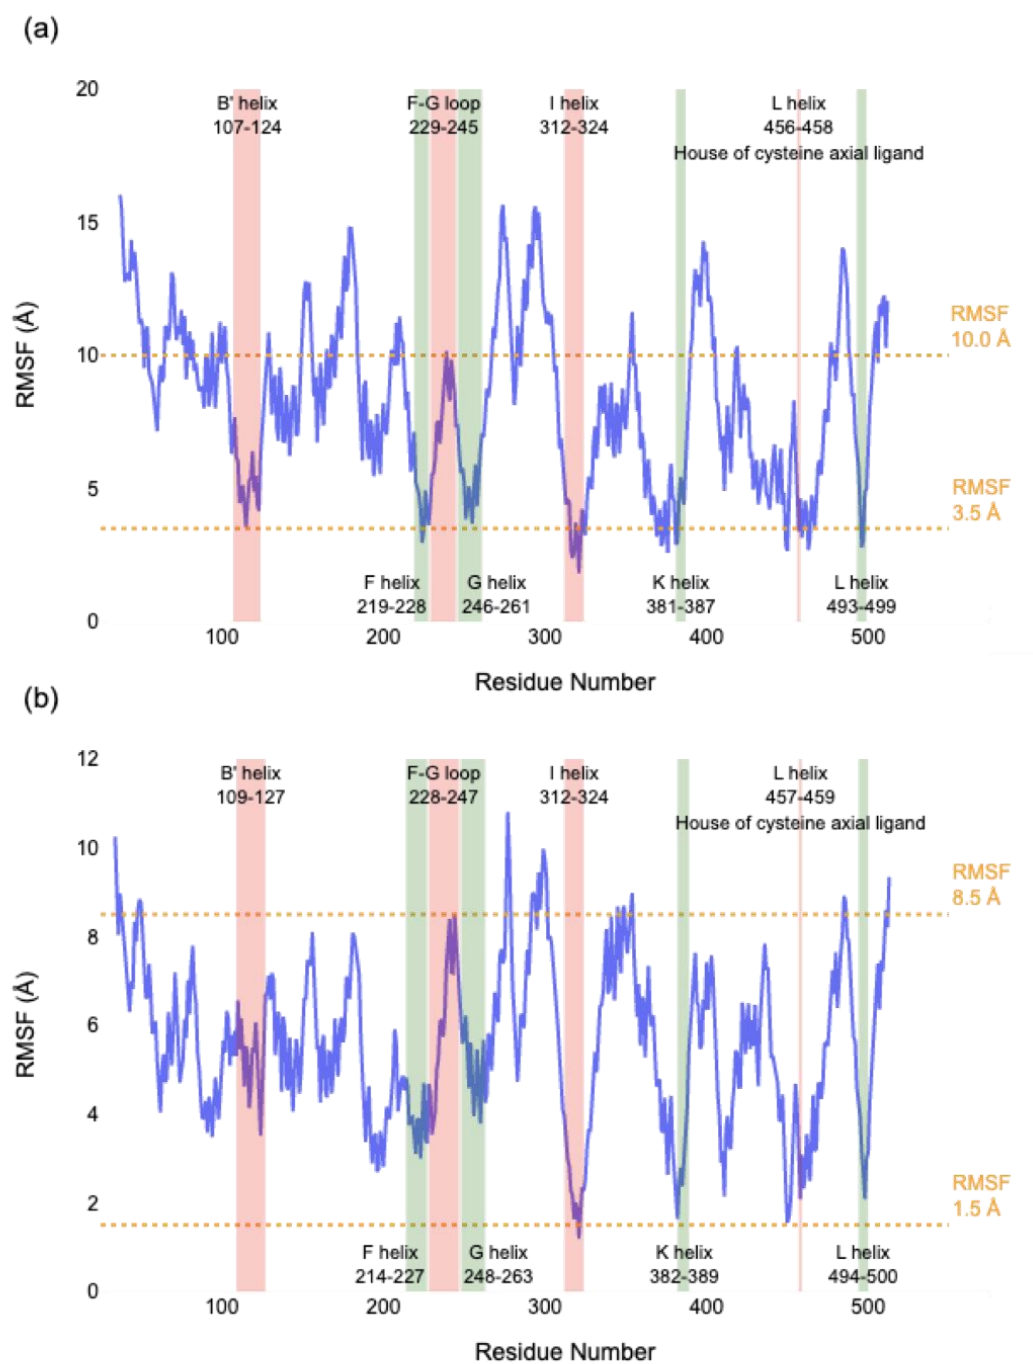

**Figure S19** RMSF values of the 1  $\mu$ s MD simulation for CYP1A1 and CYP1A2.

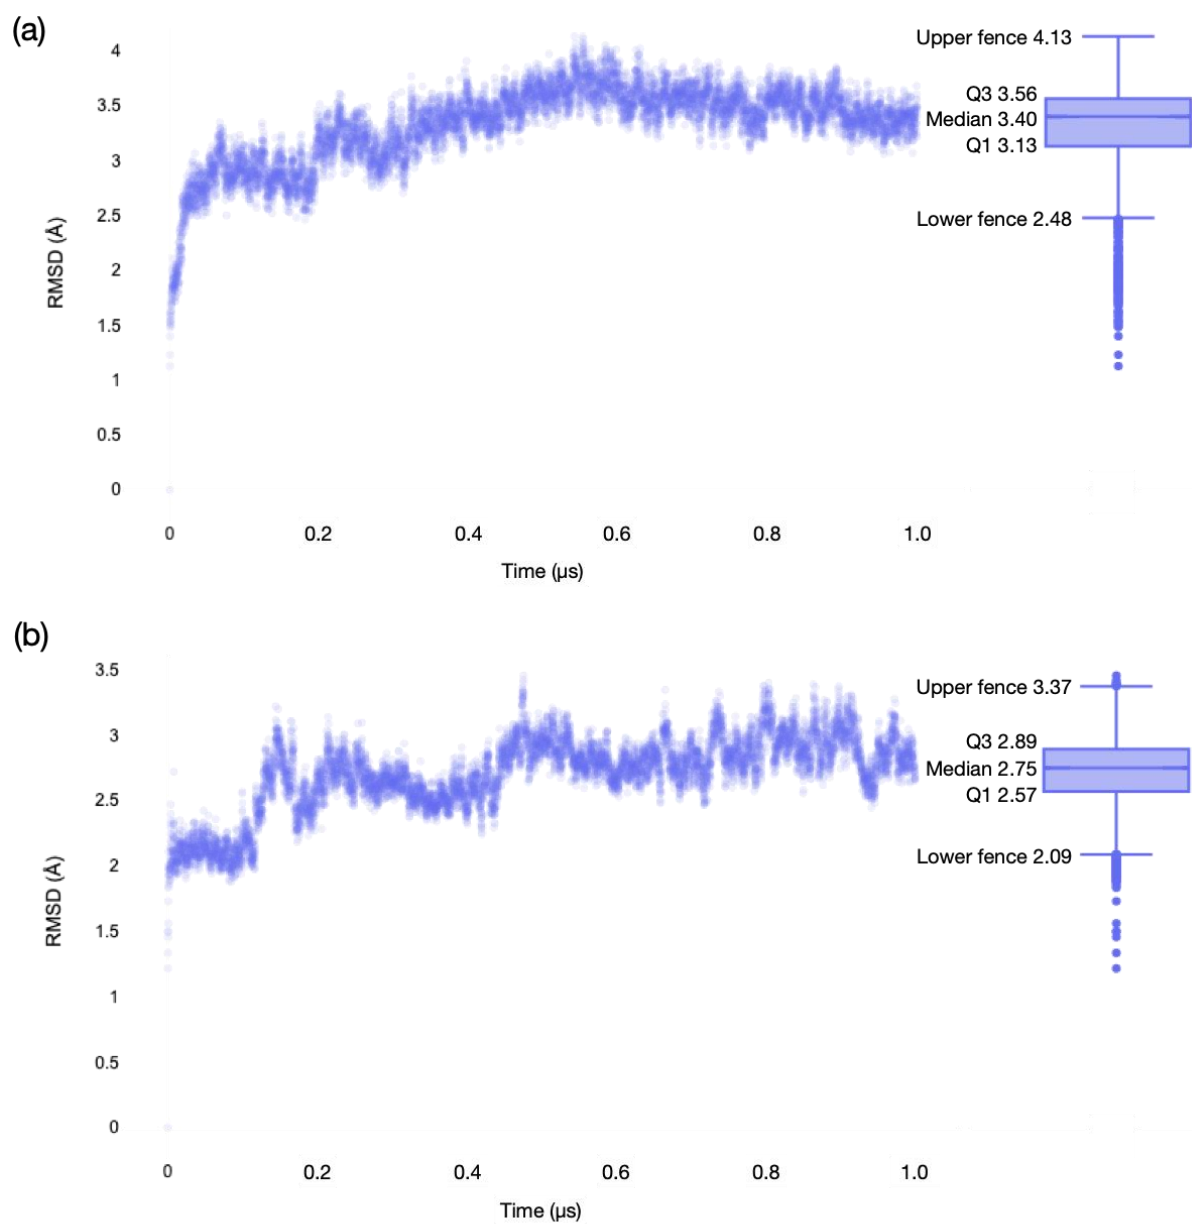

**Figure S20** Enzyme RMSD values of the 1  $\mu$ s MD simulations for CYP1A1 and CYP1A2.

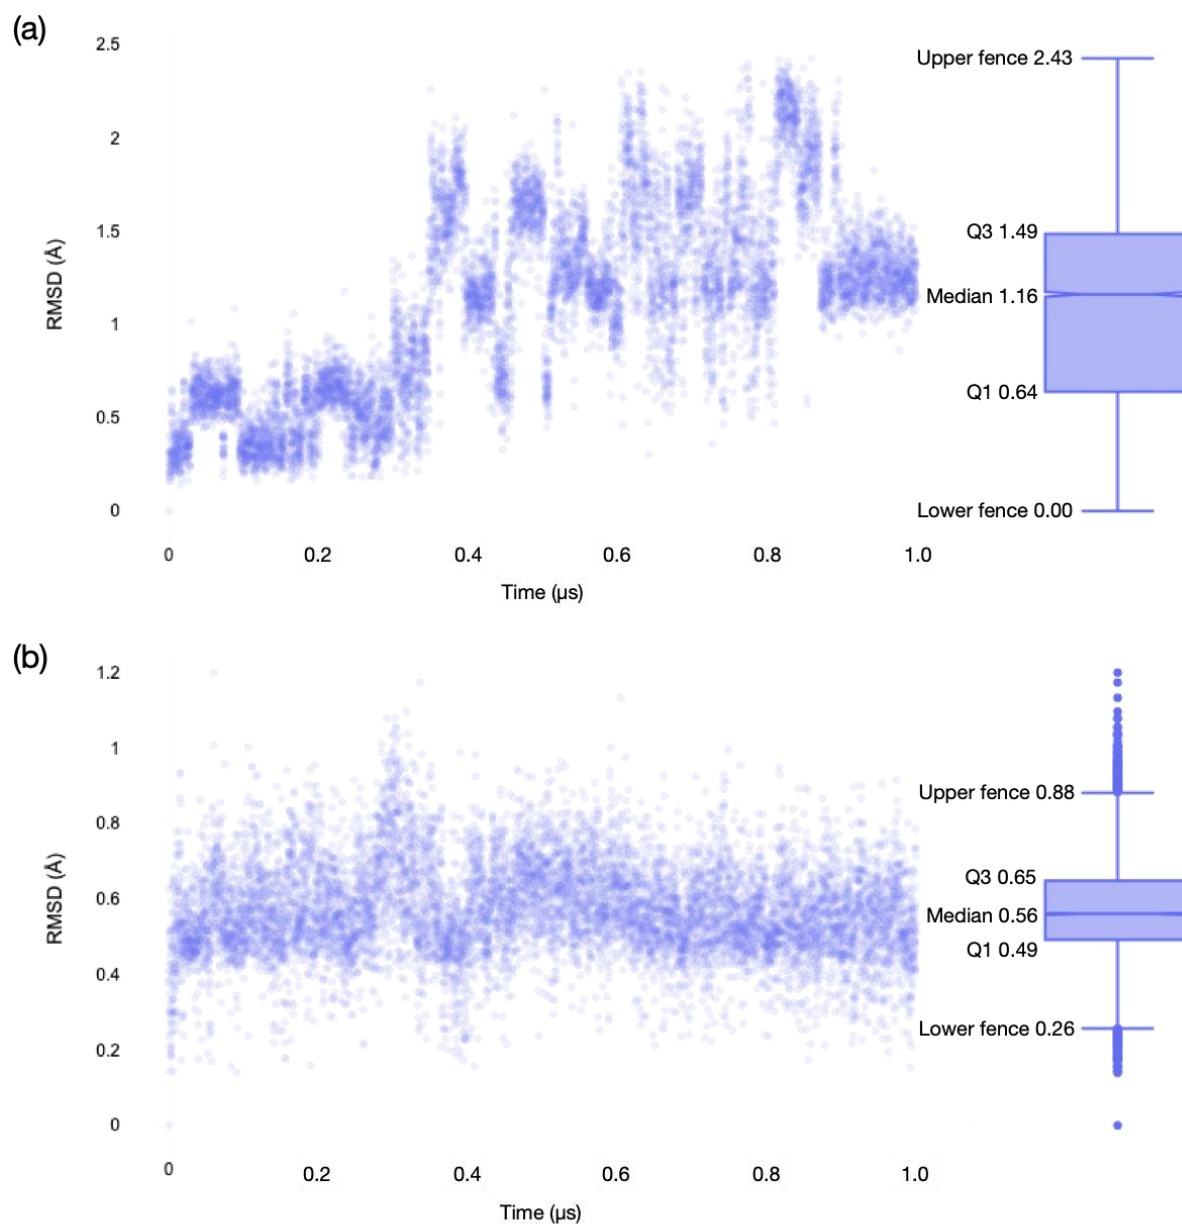

**Figure S21** Substrate melatonin RMSD values of the 1  $\mu$ s MD simulations for CYP1A1 and CYP1A2.



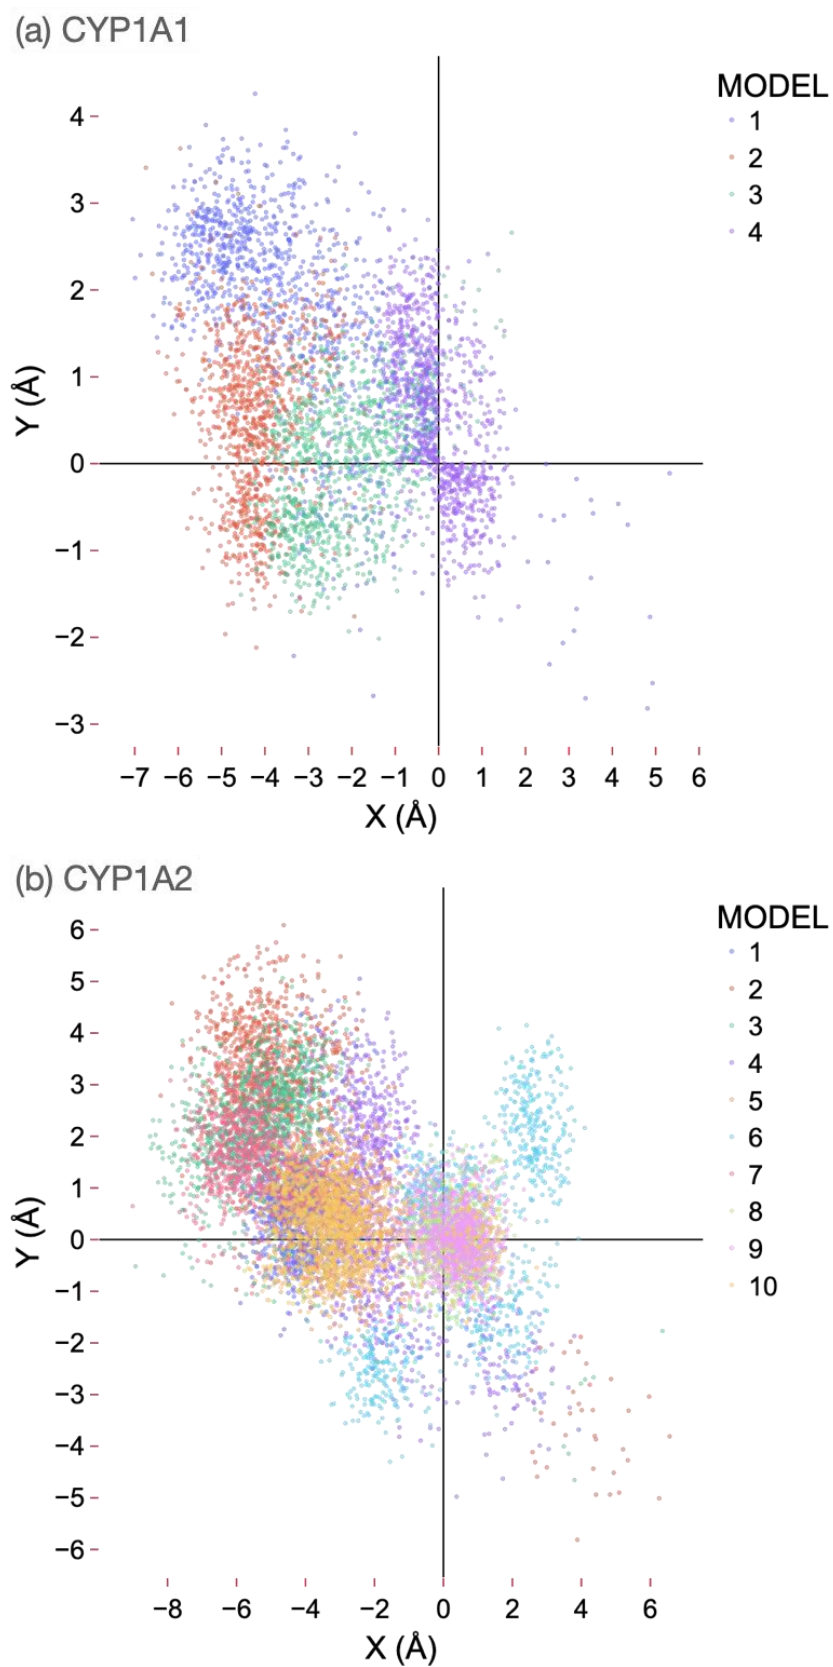

**Figure S22** Substrate mapping of the reactant models as obtained from MD simulations for CYP1A1 and CYP1A2.



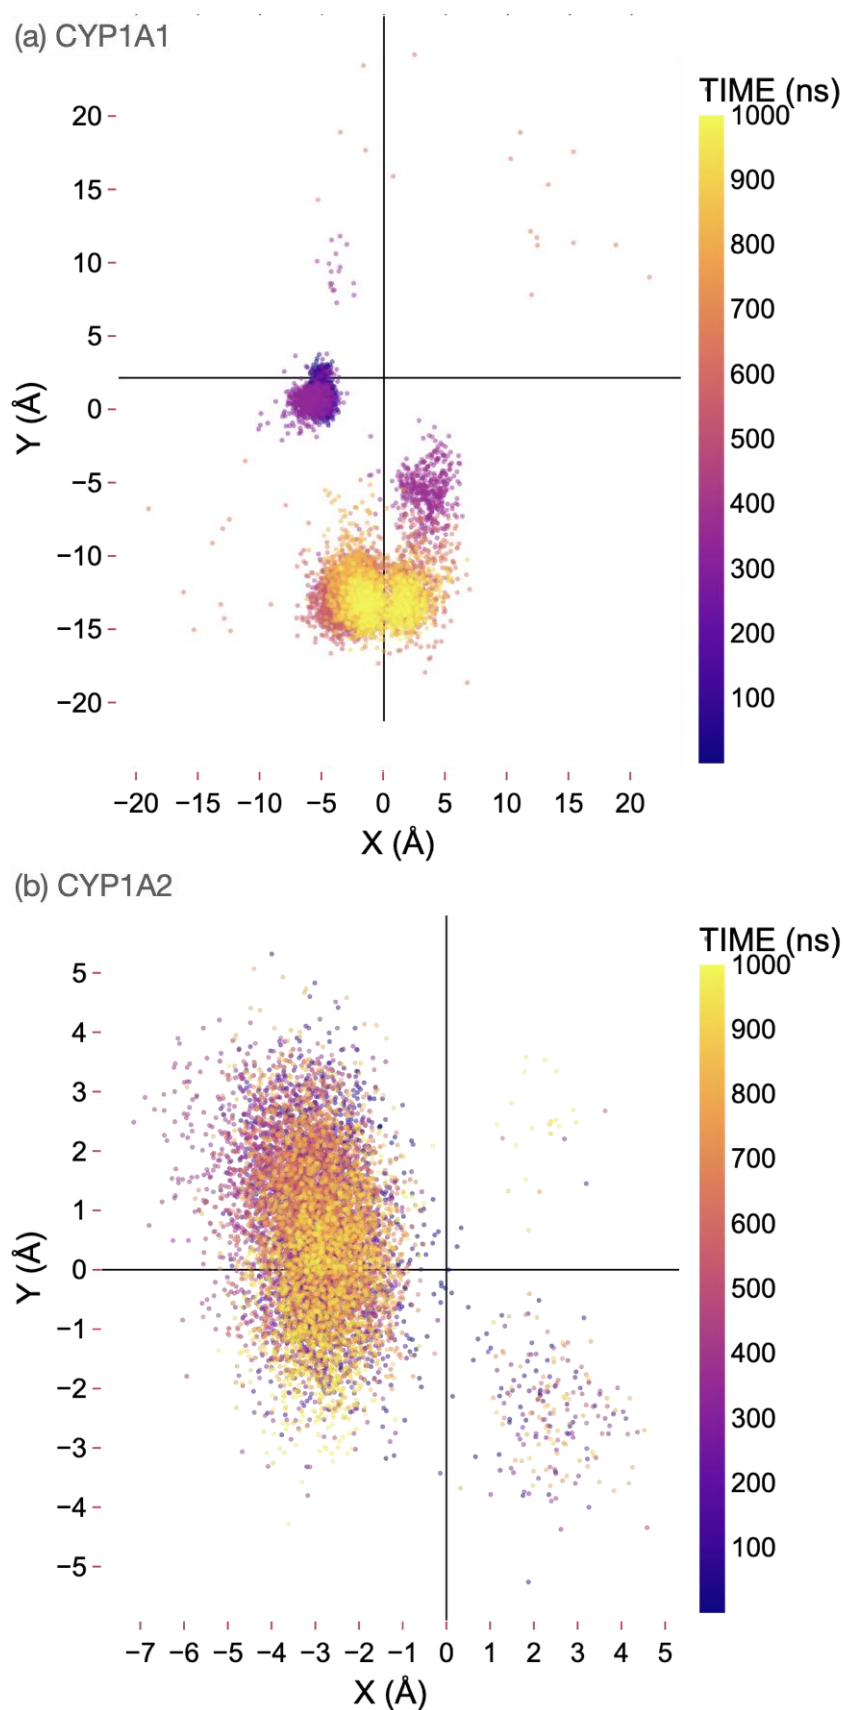

**Figure S23** Substrate mapping of reactant models as obtained from the 1  $\mu$ s MD simulations for CYP1A1 and CYP1A2.

(a) CYP1A1

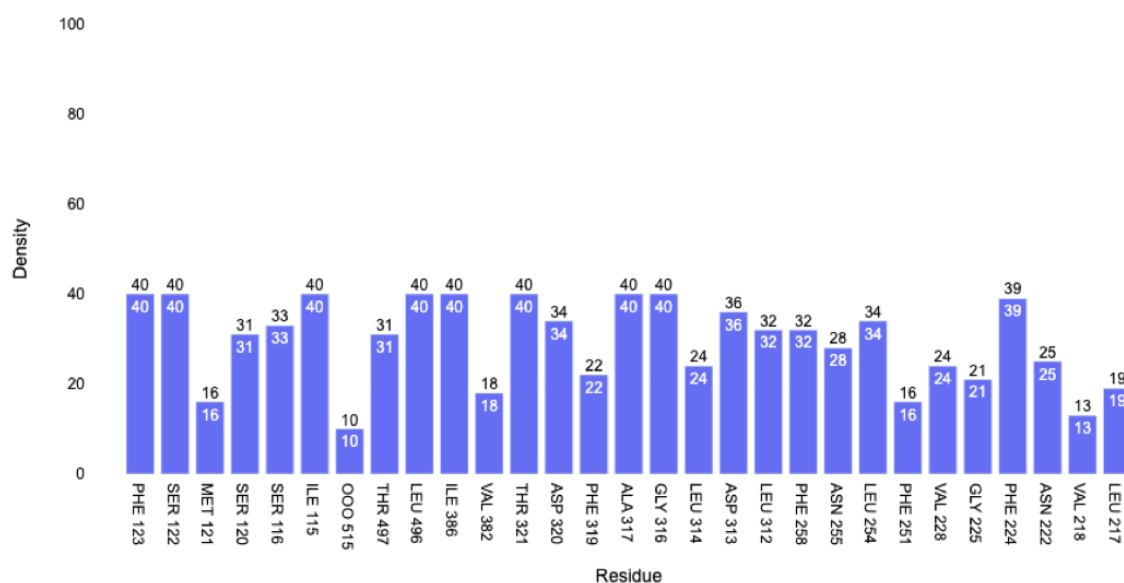

(b) CYP1A2

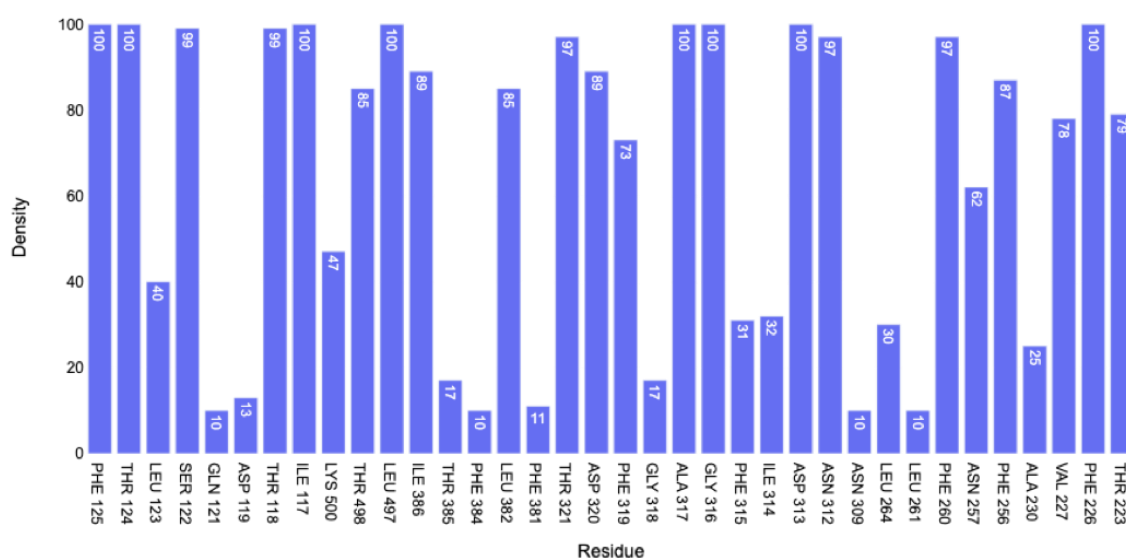

**Figure S24** Statistical distribution of amino acid residues positioned within 5 Å from melatonin substrate in the molecular dynamics simulations of the 4 reactant models of CYP1A1 and the 10 models of CYP1A2. Densities in %.

### 13 Scanning from quantum mechanics calculation

(a)

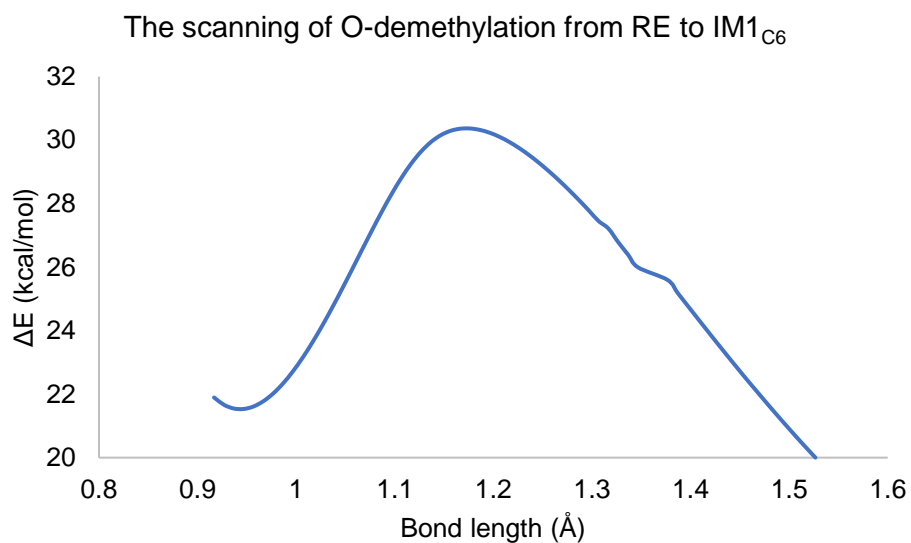

(b)

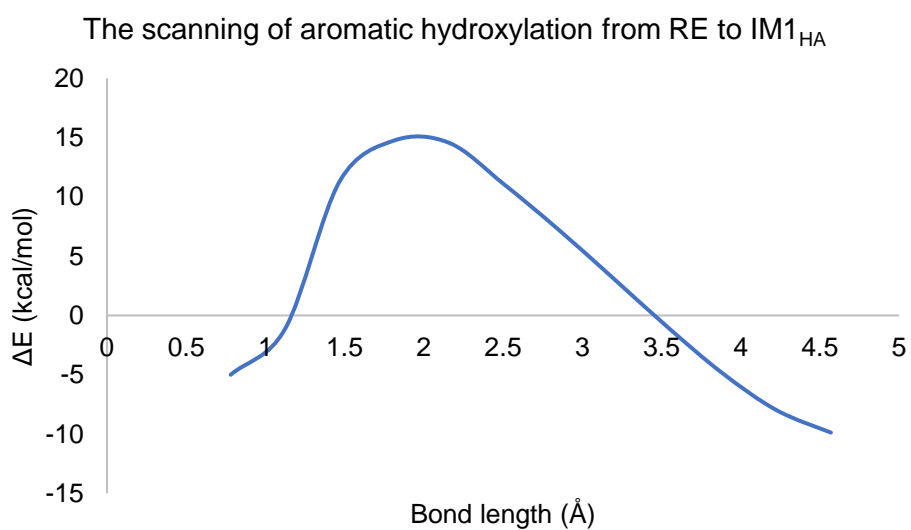

**Figure S25** Scanning from quantum mechanics calculations. Each data point represents a full geometry optimization with one degree of freedom (the reaction coordinate) fixed.

## 14 Energy data from quantum mechanics calculation

**Table S1** Absolute energies in kcal mol<sup>-1</sup> of UB3LYP/BS1 optimized geometries for the metabolism of melatonin by CYP1A2 through aromatic hydroxylation in the doublet and quartet spin states.

| CAL     | Energy | State        |                   |                   |                   |                 | MUL |
|---------|--------|--------------|-------------------|-------------------|-------------------|-----------------|-----|
|         |        | RE           | TS1 <sub>C6</sub> | IM1 <sub>C6</sub> | IM2 <sub>C6</sub> | P <sub>C6</sub> |     |
| BS1     | ZPE    | 1484.549     | 1484.561          | 1485.443          | 1487.218          | 1486.983        | 2   |
|         | E      | -4556160.818 | -4556145.862      | -4556183.697      | -4556187.538      | -4556209.768    |     |
|         | E+ZPE  | -4554676.269 | -4554661.300      | -4554698.254      | -4554700.320      | -4554722.785    |     |
|         | G      | -4554821.969 | -4554802.893      | -4554844.535      | -4554837.643      | -4554863.286    |     |
| BS2_SOL | E      | -5273049.633 | -5273045.172      | -5273078.670      | -5273081.505      | -5273101.941    | 2   |
|         | E+ZPE  | -5271565.084 | -5271560.611      | -5271593.227      | -5271594.287      | -5271614.958    |     |
|         | G      | -5271710.784 | -5271702.204      | -5271739.508      | -5271731.610      | -5271755.460    |     |
| BS1     | ZPE    | 1484.553     | 1484.803          | 1483.859          | 1485.341          | 1484.780        | 4   |
|         | E      | -4556160.729 | -4556142.630      | -4556170.360      | -4556182.697      | -4556197.669    |     |
|         | E+ZPE  | -4554676.176 | -4554657.827      | -4554686.501      | -4554697.356      | -4554712.888    |     |
|         | G      | -4554822.331 | -4554798.990      | -4554834.141      | -4554838.216      | -4554855.959    |     |
| BS2_SOL | E      | -5273050.261 | -5273041.624      | -5273064.116      | -5273077.967      | -5273099.272    | 4   |
|         | E+ZPE  | -5271565.708 | -5271556.821      | -5271580.257      | -5271592.626      | -5271614.492    |     |
|         | G      | -5271711.863 | -5271697.984      | -5271727.898      | -5271733.487      | -5271757.562    |     |

**Table S2** Absolute energies in kcal mol<sup>-1</sup> of UB3LYP/BS1 optimized geometries for the metabolism of melatonin by CYP1A2 through O-demethylation in the doublet and quartet spin state.

| CAL     | Energy | State        |                   |                   |              | MUL |
|---------|--------|--------------|-------------------|-------------------|--------------|-----|
|         |        | RE           | TS1 <sub>HA</sub> | IM1 <sub>HA</sub> | IM2          |     |
| BS1     | ZPE    | 1484.549     | 1479.619          | 1481.210          | 1485.942     | 2   |
|         | E      | -4556160.818 | -4556124.127      | -4556132.678      | -4556197.813 |     |
|         | E+ZPE  | -4554676.269 | -4554644.508      | -4554651.467      | -4554711.871 |     |
|         | G      | -4554821.969 | -4554788.926      | -4554796.824      | -4554858.175 |     |
| BS2_SOL | E      | -5273049.633 | -5273028.234      | -5273033.757      | -5273098.633 | 2   |
|         | E+ZPE  | -5271565.084 | -5271548.615      | -5271552.546      | -5271612.691 |     |
|         | G      | -5271710.784 | -5271693.032      | -5271697.903      | -5271758.995 |     |
| BS1     | ZPE    | 1484.553     | 1480.201          | 1482.271          | 1485.373     | 4   |
|         | E      | -4556160.729 | -4556123.845      | -4556132.951      | -4556198.009 |     |
|         | E+ZPE  | -4554676.176 | -4554643.643      | -4554650.680      | -4554712.636 |     |
|         | G      | -4554822.331 | -4554787.634      | -4554797.893      | -4554859.431 |     |
| BS2_SOL | E      | -5273050.261 | -5273026.520      | -5273039.291      | -5273102.415 | 4   |
|         | E+ZPE  | -5271565.708 | -5271546.319      | -5271557.020      | -5271617.042 |     |
|         | G      | -5271711.863 | -5271690.309      | -5271704.233      | -5271763.837 |     |

**Table S3** Relative energies in kcal mol<sup>-1</sup> of UB3LYP/BS1 optimized geometries for the metabolism of melatonin by CYP1A2 through aromatic hydroxylation in the doublet and quartet spin state.

| CAL     | Energy   | State  |                   |                   |                   |                 | MUL |
|---------|----------|--------|-------------------|-------------------|-------------------|-----------------|-----|
|         |          | RE     | TS1 <sub>C6</sub> | IM1 <sub>C6</sub> | IM2 <sub>C6</sub> | P <sub>C6</sub> |     |
| BS1     | ΔE       | 0.000  | 14.957            | -22.878           | -26.720           | -48.950         | 2   |
|         | Δ(E+ZPE) | 0.000  | 14.969            | -21.984           | -24.051           | -46.515         |     |
|         | ΔG       | 0.000  | 19.076            | -22.566           | -15.674           | -41.317         |     |
| BS2_SOL | ΔE       | 0.000  | 4.461             | -29.037           | -31.872           | -52.308         |     |
|         | Δ(E+ZPE) | 0.000  | 4.474             | -28.143           | -29.202           | -49.874         |     |
|         | ΔG       | 0.000  | 8.580             | -28.724           | -20.825           | -44.676         |     |
| BS1     | ΔE       | 0.089  | 18.188            | -9.541            | -21.879           | -36.850         | 4   |
|         | Δ(E+ZPE) | 0.093  | 18.443            | -10.232           | -21.086           | -36.619         |     |
|         | ΔG       | -0.362 | 22.979            | -12.172           | -16.247           | -33.990         |     |
| BS2_SOL | ΔE       | -0.628 | 8.009             | -14.483           | -28.334           | -49.639         |     |
|         | Δ(E+ZPE) | -0.624 | 8.264             | -15.173           | -27.541           | -49.407         |     |
|         | ΔG       | -1.079 | 12.800            | -17.114           | -22.703           | -46.778         |     |

**Table S4** Relative energies in kcal mol<sup>-1</sup> of UB3LYP/BS1 optimized geometries for the metabolism of melatonin by CYP1A2 through O-demethylation in the doublet and quartet spin state.

| CAL     | Energy   | State  |                   |                   |         | MUL |
|---------|----------|--------|-------------------|-------------------|---------|-----|
|         |          | RE     | TS1 <sub>HA</sub> | IM1 <sub>HA</sub> | IM2     |     |
| BS1     | ΔE       | 0.000  | 36.691            | 28.141            | -36.995 | 2   |
|         | Δ(E+ZPE) | 0.000  | 31.761            | 24.802            | -35.602 |     |
|         | ΔG       | 0.000  | 33.043            | 25.145            | -36.206 |     |
| BS2_SOL | ΔE       | 0.000  | 21.399            | 15.876            | -49.000 |     |
|         | Δ(E+ZPE) | 0.000  | 16.470            | 12.538            | -47.606 |     |
|         | ΔG       | 0.000  | 17.752            | 12.881            | -48.211 |     |
| BS1     | ΔE       | 0.089  | 36.973            | 27.868            | -37.191 | 4   |
|         | Δ(E+ZPE) | 0.093  | 32.626            | 25.590            | -36.366 |     |
|         | ΔG       | -0.362 | 34.335            | 24.076            | -37.462 |     |
| BS2_SOL | ΔE       | -0.628 | 23.113            | 10.343            | -52.782 |     |
|         | Δ(E+ZPE) | -0.624 | 18.766            | 8.065             | -51.957 |     |
|         | ΔG       | -1.079 | 20.475            | 6.551             | -53.053 |     |

## 15 Energy data from quantum mechanics calculation with RRHO fixed

**Table S5** Absolute energies with the correction in kcal mol<sup>-1</sup> of UB3LYP/BS1 optimized geometries for the metabolism of melatonin by CYP1A2 through aromatic hydroxylation in the doublet and quartet spin states.

| CAL     | Energy          | State        |                   |                   |                   |                 | MUL |
|---------|-----------------|--------------|-------------------|-------------------|-------------------|-----------------|-----|
|         |                 | RE           | TS1 <sub>C6</sub> | IM1 <sub>C6</sub> | IM2 <sub>C6</sub> | P <sub>C6</sub> |     |
| BS1     | G               | -4554821.969 | -4554802.893      | -4554844.535      | -4554837.643      | -4554863.286    | 2   |
|         | G <sub>Cr</sub> | -4554812.403 | -4554794.879      | -4554833.892      | -4554831.325      | -4554855.788    |     |
| BS2_SOL | G               | -5271710.784 | -5271702.204      | -5271739.508      | -5271731.610      | -5271755.460    |     |
|         | G <sub>Cr</sub> | -5271701.218 | -5271694.190      | -5271728.866      | -5271725.291      | -5271747.961    |     |
| BS1     | G               | -4554822.331 | -4554798.990      | -4554834.141      | -4554838.216      | -4554855.959    | 4   |
|         | G <sub>Cr</sub> | -4554812.723 | -4554791.224      | -4554823.373      | -4554831.325      | -4554847.950    |     |
| BS2_SOL | G               | -5271711.863 | -5271697.984      | -5271727.898      | -5271733.487      | -5271757.562    |     |
|         | G <sub>Cr</sub> | -5271701.226 | -5271690.218      | -5271717.129      | -5271725.291      | -5271749.553    |     |

G<sub>Cr</sub> is free energy with rroh correction

**Table S6** Absolute energies with the correction in kcal mol<sup>-1</sup> of UB3LYP/BS1 optimized geometries for the metabolism of melatonin by CYP1A2 through O-demethylation in the doublet and quartet spin state.

| CAL     | Energy          | State        |                   |                   |              | MUL |
|---------|-----------------|--------------|-------------------|-------------------|--------------|-----|
|         |                 | RE           | TS1 <sub>HA</sub> | IM1 <sub>HA</sub> | IM2          |     |
| BS1     | G               | -4554821.969 | -4554788.926      | -4554796.824      | -4554858.175 | 2   |
|         | G <sub>Cr</sub> | -4554812.403 | -4554779.557      | -4554787.152      | -4554848.087 |     |
| BS2_SOL | G               | -5271710.784 | -5271693.032      | -5271697.903      | -5271758.995 |     |
|         | G <sub>Cr</sub> | -5271701.218 | -5271683.664      | -5271688.230      | -5271748.906 |     |
| BS1     | G               | -4554822.331 | -4554787.634      | -4554797.893      | -4554859.431 | 4   |
|         | G <sub>Cr</sub> | -4554812.723 | -4554778.606      | -4554787.607      | -4554849.552 |     |
| BS2_SOL | G               | -5271711.863 | -5271690.309      | -5271704.233      | -5271763.837 |     |
|         | G <sub>Cr</sub> | -5271702.666 | -5271681.282      | -5271693.947      | -5271753.959 |     |

G<sub>Cr</sub> is free energy with rroh correction

**Table S7** Relative energies with the correction in kcal mol<sup>-1</sup> of UB3LYP/BS1 optimized geometries for the metabolism of melatonin by CYP1A2 through aromatic hydroxylation in the doublet and quartet spin state.

| CAL     | Energy           | State  |                   |                   |                   |                 | MUL |
|---------|------------------|--------|-------------------|-------------------|-------------------|-----------------|-----|
|         |                  | RE     | TS1 <sub>C6</sub> | IM1 <sub>C6</sub> | IM2 <sub>C6</sub> | P <sub>C6</sub> |     |
| BS1     | ΔG               | 0.000  | 19.076            | -22.566           | -15.674           | -41.317         | 2   |
|         | ΔG <sub>Cr</sub> | 0.000  | 17.524            | -21.490           | -18.922           | -43.385         |     |
| BS2_SOL | ΔG               | 0.000  | 8.580             | -28.724           | -20.826           | -44.676         |     |
|         | ΔG <sub>Cr</sub> | 0.000  | 7.029             | -27.647           | -24.073           | -46.743         |     |
| BS1     | ΔG               | -0.362 | 22.979            | -12.172           | -16.247           | -33.990         | 4   |
|         | ΔG <sub>Cr</sub> | -0.320 | 21.179            | -10.970           | -18.922           | -35.547         |     |
| BS2_SOL | ΔG               | -1.079 | 12.800            | -17.114           | -22.703           | -46.778         |     |
|         | ΔG <sub>Cr</sub> | -0.008 | 11.000            | -15.911           | -24.073           | -48.335         |     |

G<sub>Cr</sub> is free energy with rroh correction

**Table S8** Relative energies with the correction in kcal mol<sup>-1</sup> of UB3LYP/BS1 optimized geometries for the metabolism of melatonin by CYP1A2 through O-demethylation in the doublet and quartet spin state.

| CAL     | Energy          | State  |                   |                   |         | MUL |
|---------|-----------------|--------|-------------------|-------------------|---------|-----|
|         |                 | RE     | TS1 <sub>HA</sub> | IM1 <sub>HA</sub> | IM2     |     |
| BS1     | G               | 0.000  | 33.043            | 25.145            | -36.206 | 2   |
|         | G <sub>Cr</sub> | 0.000  | 32.846            | 25.251            | -35.684 |     |
| BS2_SOL | G               | 0.000  | 17.752            | 12.881            | -48.211 |     |
|         | G <sub>Cr</sub> | 0.000  | 17.555            | 12.988            | -47.688 |     |
| BS1     | G               | -0.362 | 34.335            | 24.076            | -37.462 | 4   |
|         | G <sub>Cr</sub> | -0.320 | 33.796            | 24.796            | -37.150 |     |
| BS2_SOL | G               | -1.079 | 20.475            | 6.551             | -53.053 |     |
|         | G <sub>Cr</sub> | -1.448 | 19.936            | 7.272             | -52.740 |     |

G<sub>Cr</sub> is free energy with rroh correction

## 16 Group charges and spin densities from quantum mechanics simulation

**Table S9** Group charges (doublet/quartet) of UB3LYP/BS1 optimized geometries for the metabolism of melatonin by CYP1A2 through aromatic hydroxylation in the doublet and quartet spin state.

| Residue group  | Composition       | RE              | TS1 <sub>C6</sub> | IM1 <sub>C6</sub> | IM2 <sub>C6</sub> | P <sub>C6</sub> |
|----------------|-------------------|-----------------|-------------------|-------------------|-------------------|-----------------|
| Compound I     | Fe                | 0.479 / 0.471   | 0.413 / 0.432     | 0.274 / 0.461     | 0.264 / 0.428     | 0.238 / 0.447   |
|                | O                 | -0.422 / -0.418 | -0.46 / -0.479    | -0.557 / -0.546   | -0.562 / -0.57    | 0.158 / 0.158   |
|                | Fe-O*             | 0.058 / 0.053   | -0.047 / -0.047   | -0.284 / -0.085   | -0.298 / -0.142   | 0.396 / 0.605   |
|                | Por*              | -0.054 / -0.047 | -0.346 / -0.375   | -0.559 / -0.519   | -0.55 / -0.748    | -0.417 / -0.52  |
|                | S                 | -0.189 / -0.191 | -0.207 / -0.164   | -0.177 / -0.349   | -0.17 / -0.15     | 0.554 / 0.554   |
|                | S-H*              | -0.101 / -0.104 | -0.13 / -0.083    | -0.111 / -0.277   | -0.109 / -0.08    | 1.008 / 1.002   |
| Melatonin      | C <sub>6</sub> *  | -0.199 / -0.199 | -0.129 / -0.082   | 0.102 / 0.103     | 0.101 / 0.098     | 0.323 / 0.326   |
|                | H <sub>C6</sub> * | 0.16 / 0.16     | 0.179 / 0.169     | 0.141 / 0.118     | 0.148 / 0.15      | 0.174 / 0.173   |
|                | The rest atoms*   | -0.04 / -0.04   | 0.28 / 0.229      | 0.497 / 0.416     | 0.5 / 0.514       | -0.832 / -0.941 |
| Environment*   |                   | -1.824 / -1.824 | -1.808 / -1.813   | -1.787 / -1.755   | -1.792 / -1.793   | -2.651 / -2.644 |
| <b>Total**</b> |                   | -2 / -2         | -2 / -2           | -2 / -2           | -2 / -2           | -2 / -2         |

\*\* is the summation of \*

**Table S10** Group charges (doublet/quartet) of UB3LYP/BS1 optimized geometries for the metabolism of melatonin by CYP1A2 through O-demethylation in the doublet and quartet spin state.

| Residue group  | Composition                     | RE              | TS1 <sub>HA</sub> | IM1 <sub>HA</sub> | IM2             |
|----------------|---------------------------------|-----------------|-------------------|-------------------|-----------------|
| Compound I     | Fe                              | 0.479 / 0.471   | 0.356 / 0.415     | 0.324 / 0.405     | 0.306 / 0.49    |
|                | O                               | -0.422 / -0.418 | -0.6 / -0.596     | -0.696 / -0.678   | 0.164 / 0.165   |
|                | Fe-O*                           | 0.058 / 0.053   | -0.244 / -0.181   | -0.372 / -0.273   | 0.47 / 0.656    |
|                | Por*                            | -0.054 / -0.047 | -0.102 / -0.247   | -0.075 / -0.283   | -0.36 / -0.376  |
|                | S                               | -0.189 / -0.191 | -0.185 / -0.104   | -0.184 / -0.091   | 0.534 / 0.534   |
|                | S-H*                            | -0.101 / -0.104 | -0.101 / -0.023   | -0.1 / -0.001     | 0.985 / 0.983   |
| Melatonin      | C <sub>Meth</sub> *             | -0.236 / -0.235 | -0.246 / -0.262   | -0.164 / -0.173   | 0.158 / 0.158   |
|                | H <sub>C<sub>Meth</sub></sub> * | 0.219 / 0.218   | 0.389 / 0.396     | 0.412 / 0.441     | 0.154 / 0.153   |
|                | The rest atoms*                 | -0.061 / -0.061 | 0.12 / 0.129      | 0.112 / 0.103     | -0.883 / -1.053 |
| Environment*   |                                 | -1.824 / -1.824 | -1.816 / -1.812   | -1.813 / -1.815   | -2.523 / -2.521 |
| <b>Total**</b> |                                 | -2 / -2         | -2 / -2           | -2 / -2           | -2 / -2         |

\*\* is the summation of \*



**Table S11** Group spin densities (doublet/quartet) of UB3LYP/BS1 optimized geometries for the metabolism of melatonin by CYP1A2 through aromatic hydroxylation in the doublet and quartet spin state.

| Residue group  | Composition       | RE              | TS1 <sub>C6</sub> | IM1 <sub>C6</sub> | IM2 <sub>C6</sub> | P <sub>C6</sub> |
|----------------|-------------------|-----------------|-------------------|-------------------|-------------------|-----------------|
| Compound I     | Fe                | 1.239 / 1.113   | 1.418 / 1.44      | 0.992 / 2.573     | 0.988 / 2.988     | 1.123 / 3.253   |
|                | O                 | 0.856 / 0.902   | 0.352 / 0.722     | 0.044 / 0.103     | 0.05 / 0.026      | 0 / 0           |
|                | Fe-O*             | 2.095 / 2.015   | 1.769 / 2.162     | 1.036 / 2.677     | 1.039 / 3.015     | 1.123 / 3.253   |
|                | Por*              | -0.593 / 0.527  | -0.21 / -0.002    | -0.076 / -0.058   | -0.075 / 0.14     | -0.089 / -0.083 |
|                | S                 | -0.518 / 0.468  | -0.172 / 0.233    | 0.035 / 0.358     | 0.037 / -0.163    | 0 / 0           |
|                | S-H*              | -0.503 / 0.455  | -0.167 / 0.229    | 0.033 / 0.35      | 0.034 / -0.163    | 0 / -0.001      |
| Melatonin      | C <sub>6</sub> *  | 0 / 0.001       | -0.12 / 0.046     | -0.003 / -0.001   | -0.004 / -0.003   | 0.001 / -0.003  |
|                | H <sub>C6</sub> * | -0.001 / -0.001 | 0.006 / 0.009     | 0 / 0.009         | 0 / 0.001         | 0 / 0           |
|                | The rest atoms*   | 0.002 / 0.002   | -0.277 / 0.555    | 0.011 / 0.023     | 0.005 / 0.01      | -0.027 / -0.166 |
| Environment*   |                   | 0 / 0.001       | -0.001 / 0.002    | 0 / 0             | 0 / 0             | -0.008 / 0      |
| <b>Total**</b> |                   | 1 / 3           | 1 / 3             | 1 / 3             | 1 / 3             | 1 / 3           |

\*\* is the summation of \*

**Table S12** Group spin densities (doublet/quartet) of UB3LYP/BS1 optimized geometries for the metabolism of melatonin by CYP1A2 through O-demethylation in the doublet and quartet spin state.

| Residue group  | Composition         | RE              | TS1 <sub>HA</sub> | IM1 <sub>HA</sub> | IM2             |
|----------------|---------------------|-----------------|-------------------|-------------------|-----------------|
| Compound I     | Fe                  | 1.239 / 1.113   | 1.022 / 1.295     | 0.992 / 1.755     | 1.222 / 2.49    |
|                | O                   | 0.856 / 0.902   | 0.498 / 0.633     | 0.093 / 0.271     | 0 / 0           |
|                | Fe-O*               | 2.095 / 2.015   | 1.52 / 1.929      | 1.085 / 2.025     | 1.222 / 2.49    |
|                | Por*                | -0.593 / 0.527  | -0.616 / 0.157    | -0.702 / -0.095   | -0.14 / 0.06    |
|                | S                   | -0.518 / 0.468  | -0.319 / 0.35     | -0.325 / 0.096    | 0 / 0           |
|                | S-H*                | -0.503 / 0.455  | -0.311 / 0.342    | -0.317 / 0.096    | 0 / -0.002      |
| Melatonin      | C <sub>Meth</sub> * | 0.002 / 0.003   | 0.386 / 0.424     | 0.848 / 0.846     | 0 / 0           |
|                | H <sub>Meth</sub> * | -0.001 / -0.002 | -0.059 / -0.037   | 0.009 / 0.021     | 0 / 0           |
|                | The rest atoms*     | 0 / 0.001       | 0.079 / 0.185     | 0.074 / 0.102     | -0.081 / 0.458  |
| Environment*   |                     | 0 / 0.001       | 0.001 / 0         | 0.004 / 0.005     | -0.001 / -0.006 |
| <b>Total**</b> |                     | 1 / 3           | 1 / 3             | 1 / 3             | 1 / 3           |

\*\* is the summation of \*

## 17 Imaginary frequency data from quantum mechanics simulation

**Table S13** Imaginary frequencies for the metabolism of melatonin by CYP1A2 through aromatic hydroxylation and O-demethylation.

| State                            | Imaginary frequency                    |
|----------------------------------|----------------------------------------|
| <sup>2,4</sup> TS1 <sub>C6</sub> | i240.44 (Doublet), i410.71 (Quartet)   |
| <sup>2,4</sup> TS1 <sub>HA</sub> | i1602.02 (Doublet), i1775.64 (Quartet) |

## 18 Geometry data from quantum mechanics simulation

**Table S14** Geometry data (doublet/quartet) of UB3LYP/BS1 optimized geometries for the metabolism of melatonin by CYP1A2 through aromatic hydroxylation in the doublet and quartet spin state. Bond length is Å and angle is degree.

| Composition                                        | RE            | TS1 <sub>C6</sub> | IM1 <sub>C6</sub> | IM2 <sub>C6</sub> | PC <sub>6</sub> |
|----------------------------------------------------|---------------|-------------------|-------------------|-------------------|-----------------|
| Fe-OC <sub>pdl</sub>                               | 1.629 / 1.631 | 1.679 / 1.715     | 1.922 / 1.933     | 1.927 / 1.920     | 2.356 / 2.595   |
| Fe-SC <sub>pdl</sub>                               | 2.575 / 2.562 | 2.434 / 2.403     | 2.322 / 2.353     | 2.318 / 2.393     | 2.242 / 2.339   |
| C <sub>6</sub> -OC <sub>pdl</sub>                  | 3.743 / 3.739 | 2.052 / 1.887     | 1.387 / 1.388     | 1.326 / 1.326     | 1.387 / 1.376   |
| H <sub>C6</sub> -C <sub>6</sub>                    | 1.086 / 1.086 | 1.082 / 1.083     | 1.110 / 1.110     | 2.163 / 2.188     | 1.939 / 1.936   |
| H <sub>C6</sub> -NC <sub>pdl</sub>                 | 5.239 / 5.232 | 2.467 / 2.624     | 2.415 / 2.419     | 1.043 / 1.028     | 3.058 / 2.998   |
| H <sub>C6</sub> -OC <sub>pdl</sub>                 | 2.888 / 2.875 | 2.275 / 2.192     | 2.081 / 2.083     | 2.304 / 2.241     | 0.974 / 0.973   |
| C <sub>6</sub> -OC <sub>pdl</sub> -Fe              | 156.966 /     | 126.974 /         | 126.884 /         | 129.186 /         | 132.156 /       |
|                                                    | 157.370       | 136.423           | 126.325           | 135.900           | 134.214         |
|                                                    | 150.798 /     | 136.892 /         | 118.091 /         | 144.397 /         | 85.503 /        |
| C <sub>6</sub> -H <sub>C6</sub> -NC <sub>pdl</sub> | 151.609       | 126.877           | 118.952           | 154.665           | 91.265          |

**Table S15** Geometry data (doublet/quartet) of UB3LYP/BS1 optimized geometries for the metabolism of melatonin by CYP1A2 through O-demethylation in the doublet and quartet spin state. Bond lengths are in Å and angles in degrees.

| Composition                                              | RE                | TS1 <sub>HA</sub> | IM1 <sub>HA</sub> | IM2               |
|----------------------------------------------------------|-------------------|-------------------|-------------------|-------------------|
| Fe-OC <sub>pdl</sub>                                     | 1.629 / 1.631     | 1.755 / 1.731     | 1.812 / 1.786     | 3.381 / 3.469     |
| Fe-SC <sub>pdl</sub>                                     | 2.575 / 2.562     | 2.440 / 2.383     | 2.431 / 2.329     | 2.236 / 2.429     |
| HC <sub>Meth</sub> -OC <sub>pdl</sub>                    | 2.369 / 2.384     | 1.175 / 1.187     | 0.975 / 0.981     | 0.974 / 0.973     |
| HC <sub>Meth</sub> -C <sub>Meth</sub>                    | 1.095 / 1.095     | 1.354 / 1.375     | 2.397 / 2.311     | 1.956 / 1.956     |
| OC <sub>pdl</sub> -C <sub>Meth</sub>                     | 3.434 / 3.447     | 2.518 / 2.543     | 3.203 / 3.201     | 1.392 / 1.391     |
| HC <sub>Meth</sub> -OC <sub>pdl</sub> -Fe                | 141.215 / 141.387 | 116.977 / 123.516 | 105.949 / 109.607 | 52.602 / 50.622   |
| HC <sub>Meth</sub> -OC <sub>pdl</sub> -C <sub>Meth</sub> | 5.201 / 5.249     | 5.796 / 7.641     | 29.018 / 20.837   | 110.352 / 110.408 |

# Geometry coordination RE<sup>2</sup>

|    |              |              |              |
|----|--------------|--------------|--------------|
| 6  | 2.719429000  | 26.652134000 | 18.197097000 |
| 6  | 6.914258000  | 28.986224000 | 17.600464000 |
| 6  | 8.246242000  | 27.743597000 | 22.080341000 |
| 6  | 3.995356000  | 25.526777000 | 22.719282000 |
| 6  | 3.762419000  | 27.387266000 | 17.638455000 |
| 6  | 3.740216000  | 27.936450000 | 16.304209000 |
| 6  | 4.919257000  | 28.595863000 | 16.136177000 |
| 6  | 5.656350000  | 28.444798000 | 17.367701000 |
| 6  | 7.647384000  | 28.859436000 | 18.774646000 |
| 6  | 8.965251000  | 29.405061000 | 18.981516000 |
| 6  | 9.345168000  | 29.042877000 | 20.239120000 |
| 6  | 8.254377000  | 28.284798000 | 20.798845000 |
| 6  | 7.193276000  | 27.053154000 | 22.657769000 |
| 6  | 7.193392000  | 26.529791000 | 24.001216000 |
| 6  | 5.994287000  | 25.912276000 | 24.184313000 |
| 6  | 5.260658000  | 26.051140000 | 22.950534000 |
| 6  | 3.281004000  | 25.636370000 | 21.532648000 |
| 6  | 1.959191000  | 25.085805000 | 21.325685000 |
| 6  | 1.612470000  | 25.394537000 | 20.046995000 |
| 6  | 2.716039000  | 26.139694000 | 19.485943000 |
| 7  | 4.934576000  | 27.705250000 | 18.267928000 |
| 7  | 7.229084000  | 28.187478000 | 19.894371000 |
| 7  | 5.998589000  | 26.763135000 | 22.036001000 |
| 7  | 3.724662000  | 26.280868000 | 20.405725000 |
| 26 | 5.526787000  | 27.105857000 | 20.096882000 |
| 1  | 1.830607000  | 26.467448000 | 17.598152000 |
| 1  | 7.367920000  | 29.551414000 | 16.791271000 |
| 1  | 9.135098000  | 27.891781000 | 22.686671000 |
| 1  | 3.521530000  | 24.983391000 | 23.531190000 |
| 6  | 5.964538000  | 19.705412000 | 17.895444000 |
| 6  | 6.717509000  | 20.689617000 | 17.231338000 |
| 6  | 6.004312000  | 21.056151000 | 19.962521000 |
| 6  | 5.626964000  | 19.903837000 | 19.265427000 |
| 6  | 5.370920000  | 18.454370000 | 17.482556000 |
| 6  | 7.080236000  | 21.833589000 | 17.930746000 |
| 6  | 6.729316000  | 22.028952000 | 19.280816000 |
| 7  | 4.901286000  | 18.800909000 | 19.677557000 |
| 1  | 4.268204000  | 18.754995000 | 20.481929000 |
| 6  | 5.441718000  | 17.860302000 | 16.101551000 |
| 6  | 4.823474000  | 16.458563000 | 15.935891000 |
| 7  | 3.375573000  | 16.400289000 | 16.067781000 |
| 2  | 5.535550000  | 16.697494000 | 15.030028000 |
| 6  | 1.066599000  | 16.576013000 | 15.333335000 |
| 8  | 2.966439000  | 17.029342000 | 13.913223000 |
| 1  | 2.963618000  | 16.155484000 | 16.969067000 |
| 7  | 7.834616000  | 22.813075000 | 17.274561000 |
| 6  | 7.055542000  | 23.915884000 | 16.785547000 |
| 1  | 4.069237000  | 17.104164000 | 18.700914000 |
| 1  | 7.002188000  | 20.586050000 | 16.187884000 |
| 1  | 5.724524000  | 21.202024000 | 21.002679000 |
| 1  | 7.014142000  | 22.954522000 | 19.771685000 |
| 1  | 4.957147000  | 18.924745000 | 15.373134000 |
| 1  | 6.495118000  | 17.791667000 | 15.785114000 |
| 1  | 5.252482000  | 15.771302000 | 16.674387000 |
| 1  | 5.078061000  | 16.090643000 | 14.936777000 |
| 1  | 0.582698000  | 17.535903000 | 15.127360000 |
| 1  | 0.865209000  | 16.284419000 | 16.367512000 |
| 1  | 0.626206000  | 15.838944000 | 14.652366000 |
| 1  | 7.750453000  | 24.571316000 | 16.252910000 |
| 1  | 6.586670000  | 24.466028000 | 17.608576000 |
| 1  | 6.285796000  | 23.556797000 | 16.090978000 |
| 16 | 4.695043000  | 29.291461000 | 21.175779000 |
| 6  | 11.206169000 | 24.106885000 | 18.798917000 |
| 8  | 12.394192000 | 24.158595000 | 19.123916000 |
| 7  | 10.663209000 | 23.038644000 | 18.155575000 |
| 6  | 11.452903000 | 21.846350000 | 17.880141000 |
| 6  | 12.358852000 | 21.923624000 | 16.634882000 |
| 6  | 11.691546000 | 21.675970000 | 15.267328000 |
| 6  | 10.619345000 | 22.715027000 | 14.903375000 |
| 6  | 12.763764000 | 21.606647000 | 14.167314000 |
| 1  | 9.671867000  | 23.034806000 | 17.924425000 |
| 1  | 10.758142000 | 21.002436000 | 17.794852000 |

|   |              |              |              |
|---|--------------|--------------|--------------|
| 1 | 13.149229000 | 21.168805000 | 16.763309000 |
| 1 | 12.864275000 | 22.898007000 | 16.641065000 |
| 1 | 11.199740000 | 20.691062000 | 15.313475000 |
| 1 | 10.239006000 | 22.535301000 | 13.889383000 |
| 1 | 11.035713000 | 23.730806000 | 14.928752000 |
| 1 | 9.765837000  | 22.682604000 | 15.585843000 |
| 1 | 12.318094000 | 21.374705000 | 13.191980000 |
| 1 | 13.516101000 | 20.838152000 | 14.385790000 |
| 1 | 13.288551000 | 22.567043000 | 14.072729000 |
| 6 | 7.991776000  | 17.698789000 | 22.263219000 |
| 6 | 6.842099000  | 17.043199000 | 23.034438000 |
| 8 | 6.968920000  | 16.675659000 | 24.203083000 |
| 6 | 9.364850000  | 17.153861000 | 22.677970000 |
| 6 | 9.619123000  | 15.668889000 | 22.349634000 |
| 6 | 9.581225000  | 15.378354000 | 20.841233000 |
| 6 | 10.959091000 | 15.218017000 | 22.951007000 |
| 1 | 7.955231000  | 18.773781000 | 22.489131000 |
| 1 | 9.461221000  | 17.290314000 | 23.761258000 |
| 1 | 10.145501000 | 17.765745000 | 22.202905000 |
| 1 | 8.823144000  | 15.086343000 | 22.833520000 |
| 1 | 9.786404000  | 14.319107000 | 20.641570000 |
| 1 | 8.605860000  | 15.610626000 | 20.400979000 |
| 1 | 10.337734000 | 15.969773000 | 20.307421000 |
| 1 | 11.141242000 | 14.151985000 | 22.764375000 |
| 1 | 10.982353000 | 15.378902000 | 24.035614000 |
| 1 | 11.795758000 | 15.778972000 | 22.512053000 |
| 7 | 5.681166000  | 16.922339000 | 22.331636000 |
| 6 | 4.436256000  | 16.448852000 | 22.917352000 |
| 6 | 3.353716000  | 17.543178000 | 23.007050000 |
| 8 | 3.007932000  | 18.022218000 | 21.713735000 |
| 6 | 3.771609000  | 18.737867000 | 23.858475000 |
| 1 | 5.642051000  | 17.298687000 | 21.391058000 |
| 1 | 4.682244000  | 16.062151000 | 23.909993000 |
| 1 | 2.468797000  | 17.070989000 | 23.466349000 |
| 1 | 2.493947000  | 17.290205000 | 21.255322000 |
| 1 | 2.957564000  | 19.469891000 | 23.896402000 |
| 1 | 4.647137000  | 19.232627000 | 23.424696000 |
| 1 | 4.027423000  | 18.427186000 | 24.877655000 |
| 6 | 0.457092000  | 13.274868000 | 20.490400000 |
| 6 | -0.722758000 | 13.591736000 | 21.411606000 |
| 8 | -1.640776000 | 12.793870000 | 21.599877000 |
| 6 | 0.689881000  | 14.282582000 | 19.337864000 |
| 6 | 1.612459000  | 15.476303000 | 19.655371000 |
| 8 | 1.618681000  | 15.904575000 | 20.860798000 |
| 8 | 2.278681000  | 15.960986000 | 18.714334000 |
| 1 | 1.368982000  | 13.201900000 | 21.097332000 |
| 1 | 1.123501000  | 13.762005000 | 18.478140000 |
| 1 | -0.270619000 | 14.696806000 | 19.002009000 |
| 7 | -0.663627000 | 14.820501000 | 22.012440000 |
| 6 | -1.826339000 | 15.403834000 | 22.664818000 |
| 6 | -1.715682000 | 15.325144000 | 24.197981000 |
| 8 | -0.441012000 | 15.864698000 | 24.605671000 |
| 6 | -1.896609000 | 13.916871000 | 24.761133000 |
| 1 | 0.076182000  | 15.439508000 | 21.651313000 |
| 1 | -2.724027000 | 14.874290000 | 22.324586000 |
| 1 | -2.460422000 | 15.998802000 | 24.638777000 |
| 1 | 0.206370000  | 15.444349000 | 24.007190000 |
| 1 | -1.741043000 | 13.921926000 | 25.845734000 |
| 1 | -1.187998000 | 13.220187000 | 24.302536000 |
| 1 | -2.904289000 | 13.542456000 | 24.547808000 |
| 6 | -1.839109000 | 21.837563000 | 23.183140000 |
| 6 | -1.427845000 | 23.279500000 | 22.868775000 |
| 8 | -0.360566000 | 23.738220000 | 23.298004000 |
| 6 | -0.608516000 | 20.918356000 | 23.182693000 |
| 6 | -0.968512000 | 19.449168000 | 23.342938000 |
| 8 | -1.831852000 | 18.909810000 | 22.632028000 |
| 7 | -0.302218000 | 18.766947000 | 24.297686000 |
| 1 | -2.309209000 | 21.820765000 | 24.176223000 |
| 1 | 0.092656000  | 21.255399000 | 23.950933000 |
| 1 | -0.084216000 | 21.013434000 | 22.223762000 |
| 1 | 0.450795000  | 19.212349000 | 24.800672000 |
| 1 | -0.392907000 | 17.747221000 | 24.375201000 |
| 7 | -2.299446000 | 23.980593000 | 22.119351000 |
| 6 | -2.057386000 | 25.355298000 | 21.694201000 |
| 6 | -3.375751000 | 26.055715000 | 21.329398000 |

|   |              |              |              |   |              |              |              |
|---|--------------|--------------|--------------|---|--------------|--------------|--------------|
| 6 | -4.187012000 | 25.286672000 | 20.261197000 | 5 | -1.577188000 | 25.246005000 | 15.296527000 |
| 8 | -4.426800000 | 25.891079000 | 19.164954000 | 6 | -1.497103000 | 24.641427000 | 13.877521000 |
| 8 | -4.550741000 | 24.119612000 | 20.551481000 | 8 | -0.490803000 | 24.831844000 | 13.192476000 |
| 1 | -3.159468000 | 23.578387000 | 21.734932000 | 6 | -0.687288000 | 24.553312000 | 16.373323000 |
| 1 | -1.385055000 | 25.368339000 | 20.825459000 | 8 | -0.320904000 | 25.493155000 | 17.375027000 |
| 1 | -3.148642000 | 27.065079000 | 20.975532000 | 6 | 0.606011000  | 23.947824000 | 15.837941000 |
| 1 | -3.999957000 | 26.136267000 | 22.229384000 | 1 | -3.364688000 | 24.529094000 | 16.221854000 |
| 6 | -1.793710000 | 20.726255000 | 19.072973000 | 1 | -1.203485000 | 26.265637000 | 15.178481000 |
| 6 | -2.899195000 | 19.695520000 | 18.985275000 | 1 | -1.293508000 | 23.744935000 | 16.817295000 |
| 8 | -3.581853000 | 19.550642000 | 17.934178000 | 1 | -1.094611000 | 26.034659000 | 17.683838000 |
| 6 | -0.370199000 | 20.126468000 | 19.201987000 | 1 | 1.206567000  | 23.606103000 | 16.687193000 |
| 6 | 0.640788000  | 21.288835000 | 19.266690000 | 1 | 1.180403000  | 24.683647000 | 15.268678000 |
| 6 | -0.066202000 | 19.133748000 | 18.070152000 | 1 | 0.407921000  | 23.093745000 | 15.184460000 |
| 6 | 2.082513000  | 20.864433000 | 19.556077000 | 7 | -2.570032000 | 23.922247000 | 13.451715000 |
| 1 | -1.862186000 | 21.351543000 | 18.180067000 | 6 | -2.702342000 | 23.458834000 | 12.074530000 |
| 1 | -0.316907000 | 19.575041000 | 20.152285000 | 6 | -2.852182000 | 21.939241000 | 11.913321000 |
| 1 | 0.602684000  | 21.842700000 | 18.317678000 | 6 | -1.638123000 | 21.064632000 | 12.192070000 |
| 1 | 0.313475000  | 21.999743000 | 20.039546000 | 6 | -1.807480000 | 19.670464000 | 12.149211000 |
| 1 | 0.920583000  | 18.678487000 | 18.196160000 | 6 | -0.356594000 | 21.564530000 | 12.458192000 |
| 1 | -0.093026000 | 19.633033000 | 17.092490000 | 6 | -0.737918000 | 18.802751000 | 12.371367000 |
| 1 | -0.790071000 | 18.311435000 | 18.057632000 | 6 | 0.714661000  | 20.691889000 | 12.685847000 |
| 1 | 2.723201000  | 21.744004000 | 19.684090000 | 6 | 0.537508000  | 19.308202000 | 12.645914000 |
| 1 | 2.145440000  | 20.259965000 | 20.469289000 | 1 | -3.408757000 | 23.918360000 | 14.021974000 |
| 1 | 2.503059000  | 20.269438000 | 18.739702000 | 1 | -1.831070000 | 23.833854000 | 11.532896000 |
| 7 | -3.119277000 | 18.954946000 | 20.082223000 | 1 | -3.693050000 | 21.588849000 | 12.526818000 |
| 6 | -4.014712000 | 17.793831000 | 20.140382000 | 1 | -3.169380000 | 21.767918000 | 10.872644000 |
| 6 | -3.492404000 | 16.704435000 | 19.157377000 | 1 | -2.797467000 | 19.268872000 | 11.940441000 |
| 8 | -2.334176000 | 16.312689000 | 19.240192000 | 1 | -0.182183000 | 22.635663000 | 12.504056000 |
| 6 | -5.525704000 | 18.143945000 | 20.061197000 | 1 | -0.898086000 | 17.727400000 | 12.334317000 |
| 8 | -5.965043000 | 18.450341000 | 18.729225000 | 1 | 1.697733000  | 21.104090000 | 12.901090000 |
| 6 | -5.920923000 | 19.256894000 | 21.031196000 | 1 | 1.368788000  | 18.632815000 | 12.837456000 |
| 1 | -2.528811000 | 19.097158000 | 20.907336000 | 1 | 8.014852000  | 26.629603000 | 24.699489000 |
| 1 | -3.847919000 | 17.373848000 | 21.136961000 | 1 | 5.625538000  | 25.398177000 | 25.062807000 |
| 1 | -6.068021000 | 17.229189000 | 20.334227000 | 1 | 9.515694000  | 29.982655000 | 18.249520000 |
| 1 | -5.267238000 | 19.022605000 | 18.335758000 | 1 | 10.272222000 | 29.261560000 | 20.753793000 |
| 1 | -6.999492000 | 19.4261      |              |   |              |              |              |

|    |              |              |              |   |              |              |              |
|----|--------------|--------------|--------------|---|--------------|--------------|--------------|
| 6  | 8.255281000  | 28.293513000 | 20.830010000 | 6 | 9.582266000  | 15.379203000 | 20.836003000 |
| 6  | 7.178831000  | 27.083628000 | 22.694022000 | 6 | 10.960941000 | 15.218196000 | 22.945210000 |
| 6  | 7.165821000  | 26.580884000 | 24.045031000 | 1 | 7.957145000  | 18.774281000 | 22.486015000 |
| 6  | 5.967648000  | 25.960310000 | 24.223673000 | 1 | 9.463495000  | 17.290346000 | 23.756628000 |
| 6  | 5.247282000  | 26.077085000 | 22.980046000 | 1 | 10.147331000 | 17.766207000 | 22.198213000 |
| 6  | 3.278938000  | 25.642425000 | 21.552824000 | 1 | 8.824946000  | 15.086734000 | 22.828506000 |
| 6  | 1.958463000  | 25.090261000 | 21.341330000 | 1 | 9.787496000  | 14.320037000 | 20.635974000 |
| 6  | 1.618166000  | 25.394587000 | 20.059876000 | 1 | 8.606671000  | 15.611459000 | 20.396252000 |
| 6  | 2.725036000  | 26.136989000 | 19.501219000 | 1 | 10.338459000 | 15.970857000 | 20.302004000 |
| 7  | 4.953873000  | 27.687477000 | 18.279467000 | 1 | 11.142898000 | 14.152185000 | 22.758272000 |
| 7  | 7.238416000  | 28.180404000 | 19.917862000 | 1 | 10.984666000 | 15.378842000 | 24.029844000 |
| 7  | 5.993338000  | 26.777322000 | 22.062151000 | 1 | 11.797493000 | 15.779155000 | 22.506040000 |
| 7  | 3.729095000  | 26.281250000 | 20.425807000 | 7 | 5.683354000  | 16.921913000 | 22.327201000 |
| 26 | 5.535222000  | 27.106054000 | 20.123615000 | 6 | 4.438774000  | 16.447189000 | 22.912621000 |
| 1  | 1.848641000  | 26.455232000 | 17.607979000 | 6 | 3.355039000  | 17.540311000 | 23.002398000 |
| 1  | 7.402894000  | 29.508146000 | 16.799413000 | 8 | 3.007493000  | 18.018171000 | 21.709052000 |
| 1  | 9.117910000  | 27.928231000 | 22.731960000 | 6 | 3.772117000  | 18.735983000 | 23.852827000 |
| 1  | 3.508432000  | 25.008325000 | 23.559144000 | 1 | 5.644482000  | 17.297235000 | 21.386200000 |
| 6  | 5.955206000  | 19.698185000 | 17.885265000 | 1 | 4.684968000  | 16.060680000 | 23.905286000 |
| 6  | 6.702475000  | 20.684616000 | 17.217988000 | 1 | 2.471030000  | 17.067320000 | 23.462589000 |
| 6  | 5.990143000  | 21.053961000 | 19.949074000 | 1 | 2.493245000  | 17.285590000 | 21.251843000 |
| 6  | 5.618093000  | 19.898033000 | 19.255116000 | 1 | 2.957042000  | 19.466816000 | 23.891277000 |
| 6  | 5.367053000  | 18.443467000 | 17.475759000 | 1 | 4.646476000  | 19.231789000 | 23.417909000 |
| 6  | 7.060082000  | 21.832038000 | 17.914325000 | 1 | 4.029452000  | 18.426106000 | 24.871870000 |
| 6  | 6.709263000  | 22.028894000 | 19.264210000 | 6 | 0.454019000  | 13.270479000 | 20.494702000 |
| 7  | 4.898336000  | 18.792443000 | 19.670644000 | 6 | -0.724559000 | 13.589743000 | 21.416694000 |
| 1  | 4.265324000  | 18.746020000 | 20.475222000 | 8 | -1.643324000 | 12.793190000 | 21.606820000 |
| 6  | 5.438915000  | 17.846738000 | 16.095990000 | 6 | 0.685856000  | 14.276195000 | 19.340208000 |
| 6  | 4.818749000  | 16.445607000 | 15.932490000 | 6 | 1.609678000  | 15.469867000 | 19.654558000 |
| 7  | 3.370850000  | 16.389850000 | 16.064885000 | 8 | 1.618474000  | 15.899318000 | 20.859548000 |
| 6  | 2.549048000  | 16.687741000 | 15.027176000 | 8 | 2.274250000  | 15.953046000 | 18.711615000 |
| 6  | 1.061965000  | 16.570148000 | 15.331359000 | 1 | 1.366630000  | 13.198153000 | 21.100605000 |
| 8  | 2.962244000  | 17.017013000 | 13.909714000 | 1 | 1.117960000  | 13.754024000 | 18.480690000 |
| 1  | 2.958814000  | 16.147179000 | 16.966727000 | 1 | -0.274834000 | 14.690532000 | 19.005003000 |
| 8  | 7.809551000  | 22.813310000 | 17.255142000 | 7 | -0.663612000 | 14.819337000 | 22.015698000 |
| 6  | 7.026460000  | 23.915420000 | 16.771158000 | 6 | -1.825472000 | 15.405023000 | 22.667529000 |
| 1  | 4.072498000  | 17.090321000 | 18.698186000 | 6 | -1.714583000 | 15.328431000 | 24.200777000 |
| 1  | 6.986475000  | 20.580069000 | 16.174450000 | 8 | -0.438935000 | 15.866572000 | 24.607344000 |
| 1  | 5.710834000  | 21.200846000 | 20.989207000 | 6 | -1.897637000 | 13.921339000 | 24.766184000 |
| 1  | 6.990115000  | 22.956814000 | 19.752976000 | 1 | 0.076324000  | 15.437091000 | 21.652690000 |
| 1  | 4.955981000  | 18.510507000 | 15.365896000 | 1 | -2.723852000 | 14.879221000 | 22.328216000 |
| 1  | 6.492561000  | 17.776062000 | 15.780762000 | 1 | -2.458128000 | 16.003971000 | 24.640702000 |
| 1  | 5.246947000  | 15.758780000 | 16.671871000 | 1 | 0.207498000  | 15.444386000 | 24.009131000 |
| 1  | 5.072658000  | 16.075809000 | 14.933895000 | 1 | -1.741868000 | 13.927869000 | 25.850748000 |
| 1  | 0.580733000  | 17.531686000 | 15.126715000 | 1 | -1.190270000 | 13.222746000 | 24.308566000 |
| 1  | 0.860524000  | 16.278176000 | 16.365422000 | 1 | -2.905971000 | 13.548218000 | 24.553651000 |
| 1  | 0.618938000  | 15.835105000 | 14.649926000 | 6 | -1.841753000 | 21.839584000 | 23.189725000 |
| 1  | 7.717681000  | 24.572253000 | 16.235484000 | 6 | -1.430233000 | 23.281913000 | 22.877658000 |
| 1  | 6.561071000  | 24.64231000  | 17.596996000 | 8 | -0.364868000 | 23.740978000 | 23.311340000 |
| 1  | 6.253623000  | 23.555949000 | 16.080231000 | 6 | -0.611115000 | 20.920445000 | 23.186937000 |
| 16 | 4.684698000  | 29.294602000 | 21.148596000 | 6 | -0.970399000 | 19.451133000 | 23.347360000 |
| 6  | 11.179979000 | 24.124581000 | 18.775323000 | 8 | -1.835501000 | 18.911852000 | 22.638467000 |
| 8  | 12.368119000 | 24.177866000 | 19.099630000 | 7 | -0.301009000 | 18.768527000 | 24.299579000 |
| 7  | 10.637623000 | 23.054629000 | 18.134263000 | 1 | -2.310940000 | 21.821234000 | 24.183194000 |
| 6  | 11.427996000 | 21.862129000 | 17.861465000 | 1 | 0.091197000  | 21.257463000 | 23.954155000 |
| 6  | 12.335169000 | 21.937877000 | 16.617004000 | 1 | -0.088390000 | 21.015919000 | 22.227160000 |
| 6  | 11.668915000 | 21.688990000 | 15.249157000 | 1 | 0.452300000  | 19.214242000 | 24.801824000 |
| 6  | 10.597069000 | 22.727790000 | 14.883488000 | 1 | -0.391503000 | 17.748789000 | 24.377217000 |
| 6  | 12.741966000 | 21.618684000 | 14.150001000 | 7 | -2.299029000 | 23.982737000 | 22.124808000 |
| 1  | 9.646059000  | 23.048889000 | 17.904137000 | 6 | -2.055879000 | 25.357675000 | 21.701023000 |
| 1  | 10.733440000 | 21.018009000 | 17.776568000 | 6 | -3.373124000 | 26.057398000 | 21.330956000 |
| 1  | 13.125278000 | 21.183033000 | 16.746873000 | 6 | -4.180133000 | 25.287988000 | 20.259766000 |
| 1  | 12.840749000 | 22.912170000 | 16.622612000 | 8 | -4.416629000 | 25.892658000 | 19.162975000 |
| 1  | 11.177011000 | 20.704159000 | 15.295839000 | 8 | -4.544175000 | 24.120638000 | 20.548539000 |
| 1  | 10.217573000 | 22.547267000 | 13.869319000 | 1 | -3.157218000 | 23.580202000 | 21.736626000 |
| 1  | 11.013473000 | 23.743584000 | 14.908397000 | 1 | -1.379836000 | 25.371330000 | 20.835175000 |
| 1  | 9.743024000  | 22.695867000 | 15.565292000 | 1 | -3.145167000 | 27.066803000 | 20.977771000 |
| 1  | 12.296976000 | 21.386216000 | 13.174481000 | 1 | -4.000825000 | 26.137854000 | 22.228527000 |
| 1  | 13.493983000 | 20.850170000 | 14.369531000 | 6 | -1.795127000 | 20.722895000 | 19.081902000 |
| 1  | 13.267036000 | 22.578905000 | 14.055211000 | 6 | -2.900501000 | 19.692366000 | 18.992250000 |
| 6  | 7.993618000  | 17.699475000 | 22.259213000 | 8 | -3.580968000 | 19.547282000 | 17.939728000 |
| 6  | 6.844086000  | 17.043401000 | 23.030203000 | 6 | -0.371429000 | 20.122681000 | 19.207449000 |
| 8  | 6.970949000  | 16.675887000 | 24.198854000 | 6 | 0.639578000  | 21.285184000 | 19.269518000 |
| 6  | 9.366772000  | 17.154236000 | 22.673330000 | 6 | -0.069981000 | 19.129718000 | 18.075158000 |
| 6  | 9.620787000  | 15.669343000 | 22.344468000 | 6 | 2.081949000  | 20.861165000 | 19.555989000 |

|   |              |              |              |                                 |              |              |              |
|---|--------------|--------------|--------------|---------------------------------|--------------|--------------|--------------|
| 1 | -1.864673000 | 21.350966000 | 18.191041000 | 6                               | -2.686915000 | 23.461901000 | 12.072301000 |
| 1 | -0.316074000 | 19.571387000 | 20.157697000 | 6                               | -2.841006000 | 21.942792000 | 11.910656000 |
| 1 | 0.599233000  | 21.838638000 | 18.320372000 | 6                               | -1.629589000 | 21.064762000 | 12.190142000 |
| 1 | 0.313769000  | 21.996387000 | 20.042739000 | 6                               | -1.803169000 | 19.671080000 | 12.148540000 |
| 1 | 0.917168000  | 18.674665000 | 18.199092000 | 6                               | -0.346534000 | 21.561104000 | 12.455513000 |
| 1 | -0.099118000 | 19.628620000 | 17.097374000 | 6                               | -0.736024000 | 18.800416000 | 12.370737000 |
| 1 | -0.793737000 | 18.307284000 | 18.064647000 | 6                               | 0.722268000  | 20.685480000 | 12.683276000 |
| 1 | 2.722852000  | 21.740824000 | 19.682122000 | 6                               | 0.541054000  | 19.302305000 | 12.644222000 |
| 1 | 2.146863000  | 20.257170000 | 20.469361000 | 1                               | -3.393385000 | 23.921927000 | 14.019502000 |
| 1 | 2.500779000  | 20.265825000 | 18.738993000 | 1                               | -1.814195000 | 23.834611000 | 11.531411000 |
| 7 | -3.122945000 | 18.952021000 | 20.088822000 | 1                               | -3.683155000 | 21.594618000 | 12.523616000 |
| 6 | -4.019475000 | 17.791662000 | 20.145146000 | 1                               | -3.157983000 | 21.772483000 | 10.869743000 |
| 6 | -3.496857000 | 16.702158000 | 19.162459000 | 1                               | -2.794587000 | 19.272391000 | 11.941079000 |
| 8 | -2.339169000 | 16.309139000 | 19.246873000 | 1                               | -0.169090000 | 22.631747000 | 12.501117000 |
| 6 | -5.529983000 | 18.143389000 | 20.063871000 | 1                               | -0.899337000 | 17.725501000 | 12.334619000 |
| 8 | -5.967076000 | 18.450845000 | 18.731431000 | 1                               | 1.706618000  | 21.094941000 | 12.897934000 |
| 6 | -5.925411000 | 19.256417000 | 21.033710000 | 1                               | 1.370437000  | 18.624586000 | 12.835737000 |
| 1 | -2.534261000 | 19.094488000 | 20.915249000 | 1                               | 7.978535000  | 26.695831000 | 24.751145000 |
| 1 | -3.854558000 | 17.370986000 | 21.141757000 | 1                               | 5.590905000  | 25.458195000 | 25.105691000 |
| 1 | -6.073673000 | 17.229099000 | 20.335742000 | 1                               | 9.533412000  | 29.963187000 | 18.270915000 |
| 1 | -5.267975000 | 19.022223000 | 18.339035000 | 1                               | 10.270043000 | 29.276412000 | 20.790780000 |
| 1 | -7.003774000 | 19.426511000 | 20.966339000 | 1                               | 2.956463000  | 27.775152000 | 15.605658000 |
| 1 | -5.417056000 | 20.193960000 | 20.788383000 | 1                               | 5.318129000  | 29.076999000 | 15.262702000 |
| 1 | -5.670482000 | 18.990482000 | 22.066856000 | 1                               | 1.370929000  | 24.566391000 | 22.087789000 |
| 7 | -4.397648000 | 16.241216000 | 18.250291000 | 1                               | 0.721320000  | 25.161515000 | 19.499634000 |
| 6 | -4.007895000 | 15.405464000 | 17.131658000 | 1                               | 7.832819000  | 17.618330000 | 21.178380000 |
| 6 | -4.221508000 | 16.071147000 | 15.764011000 | 1                               | 4.038130000  | 15.627070000 | 22.304888000 |
| 8 | -4.421806000 | 15.393408000 | 14.763580000 | 1                               | 0.245868000  | 12.276542000 | 20.089161000 |
| 1 | -5.256166000 | 16.783949000 | 18.171451000 | 1                               | -1.885311000 | 16.457389000 | 22.375582000 |
| 1 | -2.947460000 | 15.162787000 | 17.255827000 | 1                               | -2.591295000 | 21.475087000 | 22.480261000 |
| 7 | -4.186424000 | 17.441668000 | 15.760966000 | 1                               | -1.543151000 | 25.886091000 | 22.510782000 |
| 6 | -4.273391000 | 18.198038000 | 14.525979000 | 1                               | -3.575042000 | 23.938613000 | 11.636512000 |
| 6 | -5.485679000 | 19.127436000 | 14.408020000 | 1                               | -1.994365000 | 21.377393000 | 19.940740000 |
| 8 | -5.508666000 | 20.019674000 | 13.558149000 | 1                               | 12.063733000 | 21.687540000 | 18.736094000 |
| 1 | -3.856316000 | 17.936578000 | 16.586290000 | 1                               | -5.358540000 | 27.247645000 | 16.728262000 |
| 1 | -3.380032000 | 18.811501000 | 14.377148000 | 1                               | -8.582515000 | 19.099991000 | 15.544865000 |
| 1 | -4.322341000 | 17.475414000 | 13.705189000 | 8                               | -2.190824000 | 27.255750000 | 18.306767000 |
| 7 | -6.526354000 | 18.877031000 | 15.244700000 | 1                               | -2.433555000 | 27.732204000 | 17.494157000 |
| 6 | -7.723326000 | 19.707360000 | 15.253603000 | 1                               | -3.030442000 | 26.821374000 | 18.614017000 |
| 6 | -7.623940000 | 20.873958000 | 16.253950000 | 1                               | -4.567390000 | 14.464667000 | 17.113637000 |
| 8 | -8.338283000 | 20.926327000 | 17.252401000 | 6                               | 4.717312000  | 17.952096000 | 18.581472000 |
| 1 | -6.377713000 | 18.235720000 | 16.013231000 | 8                               | 6.210134000  | 25.719688000 | 19.592427000 |
| 1 | -7.864309000 | 20.081914000 | 14.235501000 | 6                               | 10.218477000 | 25.269835000 | 19.065303000 |
| 7 | -6.666214000 | 21.783717000 | 15.947243000 | 1                               | 10.323289000 | 25.556765000 | 20.115853000 |
| 6 | -6.304199000 | 22.859573000 | 16.850385000 | 1                               | 10.501003000 | 26.142367000 | 18.465390000 |
| 6 | -5.888688000 | 24.080438000 | 16.017992000 | 1                               | 9.169131000  | 25.032211000 | 18.869654000 |
| 8 | -5.846680000 | 24.041152000 | 14.783424000 | 1                               | 3.673170000  | 28.767526000 | 21.874785000 |
| 6 | -5.162564000 | 22.438358000 | 17.793743000 |                                 |              |              |              |
| 8 | -3.954601000 | 22.269315000 | 17.045258000 |                                 |              |              |              |
| 1 | -6.185972000 | 21.741273000 | 15.053947000 |                                 |              |              |              |
| 1 | -7.183950000 | 23.101353000 | 17.456899000 |                                 |              |              |              |
| 1 | -5.000507000 | 23.175270000 | 18.587634000 |                                 |              |              |              |
| 1 | -5.458721000 | 21.500484000 | 18.276717000 |                                 |              |              |              |
| 1 | -3.748090000 | 21.316412000 | 17.034635000 |                                 |              |              |              |
| 7 | -5.560025000 | 25.181657000 | 16.737333000 |                                 |              |              |              |
| 6 | -5.129782000 | 26.396647000 | 16.082402000 |                                 |              |              |              |
| 6 | -3.643998000 | 26.492608000 | 15.718376000 |                                 |              |              |              |
| 8 | -3.174400000 | 27.576716000 | 15.363628000 |                                 |              |              |              |
| 1 | -5.371553000 | 25.161841000 | 17.752385000 |                                 |              |              |              |
| 1 | -5.683439000 | 26.515191000 | 15.145574000 |                                 |              |              |              |
| 7 | -2.927833000 | 25.343155000 | 15.783438000 |                                 |              |              |              |
| 6 | -1.558465000 | 25.242451000 | 15.296842000 |                                 |              |              |              |
| 6 | -1.479316000 | 24.639420000 | 13.877078000 |                                 |              |              |              |
| 8 | -0.471823000 | 24.827208000 | 13.193045000 |                                 |              |              |              |
| 6 | -0.670206000 | 24.546923000 | 16.373159000 |                                 |              |              |              |
| 8 | -0.303725000 | 25.484712000 | 17.376758000 |                                 |              |              |              |
| 6 | 0.622920000  | 23.940980000 | 15.837945000 |                                 |              |              |              |
| 1 | -3.347777000 | 24.527669000 | 16.220393000 |                                 |              |              |              |
| 1 | -1.182882000 | 26.261557000 | 15.180124000 |                                 |              |              |              |
| 1 | -1.277711000 | 23.738441000 | 16.815212000 |                                 |              |              |              |
| 1 | -1.077372000 | 26.025944000 | 17.686121000 |                                 |              |              |              |
| 1 | 1.222142000  | 23.596720000 | 16.687114000 |                                 |              |              |              |
| 1 | 1.198757000  | 24.677394000 | 15.270895000 |                                 |              |              |              |
| 1 | 0.424590000  | 23.088613000 | 15.182336000 |                                 |              |              |              |
| 7 | -2.554279000 | 23.924270000 | 13.449759000 |                                 |              |              |              |
|   |              |              |              | TS1 <sup>2</sup> C <sub>6</sub> |              |              |              |
|   |              |              |              | 6                               | 3.757582000  | 27.132835000 | 17.771144000 |
|   |              |              |              | 6                               | 8.477556000  | 27.300010000 | 18.825825000 |
|   |              |              |              | 6                               | 7.710630000  | 24.622692000 | 22.796287000 |
|   |              |              |              | 6                               | 2.971826000  | 24.576212000 | 21.799138000 |
|   |              |              |              | 6                               | 5.124003000  | 27.380565000 | 17.693748000 |
|   |              |              |              | 6                               | 5.757591000  | 28.137132000 | 16.638136000 |
|   |              |              |              | 6                               | 7.084707000  | 28.194397000 | 16.938848000 |
|   |              |              |              | 6                               | 7.261198000  | 27.467570000 | 18.175726000 |
|   |              |              |              | 6                               | 8.670918000  | 26.595393000 | 20.007393000 |
|   |              |              |              | 6                               | 9.943693000  | 26.458793000 | 20.669934000 |
|   |              |              |              | 6                               | 9.732671000  | 25.701188000 | 21.783302000 |
|   |              |              |              | 6                               | 8.329382000  | 25.377137000 | 21.807060000 |
|   |              |              |              | 6                               | 6.349446000  | 24.352395000 | 22.853606000 |
|   |              |              |              | 6                               | 5.705715000  | 23.605540000 | 23.909334000 |
|   |              |              |              | 6                               | 4.373325000  | 23.602489000 | 23.627694000 |
|   |              |              |              | 6                               | 4.202397000  | 24.342440000 | 22.399465000 |
|   |              |              |              | 6                               | 2.780824000  | 25.295787000 | 20.627684000 |
|   |              |              |              | 6                               | 1.486021000  | 25.497769000 | 20.013611000 |
|   |              |              |              | 6                               | 1.699402000  | 26.205161000 | 18.873014000 |
|   |              |              |              | 6                               | 3.127591000  | 26.440947000 | 18.795254000 |
|   |              |              |              | 7                               | 6.058916000  | 26.982521000 | 18.609966000 |
|   |              |              |              | 7                               | 7.700488000  | 25.922690000 | 20.711627000 |
|   |              |              |              | 7                               | 5.419164000  | 24.778222000 | 21.942190000 |
|   |              |              |              | 7                               | 3.761504000  | 25.888911000 | 19.880096000 |
|   |              |              |              | 26                              | 5.749235000  | 25.815806000 | 20.241935000 |

|    |              |              |              |   |              |              |              |
|----|--------------|--------------|--------------|---|--------------|--------------|--------------|
| 1  | 3.131536000  | 27.516169000 | 16.971175000 | 6 | 3.764331000  | 18.283869000 | 22.788487000 |
| 1  | 9.349861000  | 27.771843000 | 18.382021000 | 8 | 3.419407000  | 18.744233000 | 21.486738000 |
| 1  | 8.334631000  | 24.237372000 | 23.597257000 | 6 | 4.192107000  | 19.488367000 | 23.619438000 |
| 1  | 2.082585000  | 24.165747000 | 22.268499000 | 1 | 5.949358000  | 17.935760000 | 21.072482000 |
| 6  | 6.077011000  | 20.896628000 | 17.711683000 | 1 | 5.134495000  | 16.845828000 | 23.702745000 |
| 6  | 6.890843000  | 21.884628000 | 17.100265000 | 1 | 2.876253000  | 17.826607000 | 23.256644000 |
| 6  | 6.416612000  | 21.918278000 | 19.930433000 | 1 | 2.947248000  | 17.991217000 | 21.016970000 |
| 6  | 5.855566000  | 20.943828000 | 19.129564000 | 1 | 3.390701000  | 20.234308000 | 23.634184000 |
| 6  | 5.383960000  | 19.762933000 | 17.204532000 | 1 | 5.080299000  | 19.964594000 | 23.190986000 |
| 6  | 7.440499000  | 22.866104000 | 17.894366000 | 1 | 4.429499000  | 19.192682000 | 24.647426000 |
| 6  | 7.174293000  | 22.939804000 | 19.305937000 | 6 | 1.341288000  | 13.821673000 | 20.121950000 |
| 7  | 5.062160000  | 19.852828000 | 19.452135000 | 6 | 0.148835000  | 13.962183000 | 21.070684000 |
| 1  | 4.549688000  | 19.674551000 | 20.324556000 | 8 | -0.657400000 | 13.049803000 | 21.247229000 |
| 6  | 5.345026000  | 19.307268000 | 15.769058000 | 6 | 1.431131000  | 14.888245000 | 19.003287000 |
| 6  | 5.021083000  | 17.815620000 | 15.539270000 | 6 | 2.210578000  | 16.171150000 | 19.348003000 |
| 7  | 3.627807000  | 17.450669000 | 15.736583000 | 8 | 2.200720000  | 16.554493000 | 20.566461000 |
| 6  | 2.715512000  | 17.603914000 | 14.740208000 | 8 | 2.787648000  | 16.767943000 | 18.408997000 |
| 6  | 1.303779000  | 17.151963000 | 15.081082000 | 1 | 2.266757000  | 13.835099000 | 20.712424000 |
| 8  | 3.006381000  | 18.060611000 | 13.630146000 | 1 | 1.905378000  | 14.451832000 | 18.118431000 |
| 1  | 3.321756000  | 17.081398000 | 16.638200000 | 1 | 0.421897000  | 15.196565000 | 18.697042000 |
| 8  | 8.272702000  | 23.856896000 | 17.428393000 | 7 | 0.064308000  | 15.169865000 | 21.709727000 |
| 6  | 8.121839000  | 24.252047000 | 16.067661000 | 6 | -1.151629000 | 15.582452000 | 22.395861000 |
| 1  | 4.099689000  | 18.314469000 | 18.362615000 | 6 | -1.008482000 | 15.471953000 | 23.923654000 |
| 1  | 7.070752000  | 21.854529000 | 16.031250000 | 8 | 0.183769000  | 16.172310000 | 24.336868000 |
| 1  | 6.248801000  | 21.955450000 | 21.001645000 | 6 | -0.983486000 | 14.035939000 | 24.443295000 |
| 1  | 7.796572000  | 23.595253000 | 19.900233000 | 1 | 0.714124000  | 15.886891000 | 21.363022000 |
| 1  | 4.621902000  | 19.895950000 | 15.188799000 | 1 | -1.980946000 | 14.957650000 | 22.048989000 |
| 1  | 6.326292000  | 19.505786000 | 15.312718000 | 1 | -1.833291000 | 16.020978000 | 24.393635000 |
| 1  | 5.632326000  | 17.193245000 | 16.202885000 | 1 | 0.878865000  | 15.855910000 | 23.728712000 |
| 1  | 5.277494000  | 17.570823000 | 14.503872000 | 1 | -0.816852000 | 14.030515000 | 25.526195000 |
| 1  | 0.613144000  | 17.982605000 | 14.906546000 | 1 | -0.189382000 | 13.459708000 | 23.958177000 |
| 1  | 1.204357000  | 16.809660000 | 16.114354000 | 1 | -1.930684000 | 13.529299000 | 24.226409000 |
| 1  | 1.017718000  | 16.343563000 | 14.398713000 | 6 | -1.863759000 | 21.976798000 | 22.705563000 |
| 1  | 8.665938000  | 25.192558000 | 15.964222000 | 6 | -1.558560000 | 23.383950000 | 22.172184000 |
| 1  | 7.064315000  | 24.414917000 | 15.835438000 | 8 | -0.407886000 | 23.842384000 | 22.199174000 |
| 1  | 8.543332000  | 23.507335000 | 15.379600000 | 6 | -0.577550000 | 21.201043000 | 23.002465000 |
| 16 | 5.479277000  | 27.874264000 | 21.513038000 | 6 | -0.789042000 | 19.699703000 | 23.134382000 |
| 6  | 12.202945000 | 24.110051000 | 18.290946000 | 8 | -1.557007000 | 19.071803000 | 22.389150000 |
| 8  | 13.323541000 | 23.832382000 | 18.716578000 | 7 | -0.072102000 | 19.082230000 | 24.099161000 |
| 7  | 11.118100000 | 23.311828000 | 18.480962000 | 1 | -2.479201000 | 22.063411000 | 23.610997000 |
| 6  | 11.200837000 | 22.088736000 | 19.271801000 | 1 | -0.086425000 | 21.607492000 | 23.892607000 |
| 6  | 11.814077000 | 20.870227000 | 18.558339000 | 1 | 0.129154000  | 21.355237000 | 22.177744000 |
| 6  | 10.966101000 | 20.198952000 | 17.457323000 | 1 | 0.604192000  | 19.606111000 | 24.634534000 |
| 6  | 10.878353000 | 21.028730000 | 16.166303000 | 1 | -0.031848000 | 18.058442000 | 24.149358000 |
| 6  | 11.521298000 | 18.799438000 | 17.144949000 | 7 | -2.617461000 | 24.062355000 | 21.695382000 |
| 1  | 10.206517000 | 23.618374000 | 18.155847000 | 6 | -2.508551000 | 25.406602000 | 21.130809000 |
| 1  | 10.186404000 | 21.853736000 | 19.613242000 | 6 | -3.886900000 | 26.087168000 | 21.111692000 |
| 1  | 12.010216000 | 20.122540000 | 19.341424000 | 6 | -4.914760000 | 25.275660000 | 20.293494000 |
| 1  | 12.794115000 | 21.159944000 | 18.157791000 | 8 | -5.387815000 | 25.816550000 | 19.240842000 |
| 1  | 9.943794000  | 20.073933000 | 17.846255000 | 8 | -5.196165000 | 24.124527000 | 20.714124000 |
| 1  | 10.286908000 | 20.502084000 | 15.406802000 | 1 | -3.546868000 | 23.646077000 | 21.583863000 |
| 1  | 11.879170000 | 21.204802000 | 15.749134000 | 1 | -2.099367000 | 25.364405000 | 20.111545000 |
| 1  | 10.415410000 | 22.003115000 | 16.340548000 | 1 | -3.774675000 | 27.093668000 | 20.700896000 |
| 1  | 10.923656000 | 18.297637000 | 16.374156000 | 1 | -4.258310000 | 26.170482000 | 22.141690000 |
| 1  | 11.523707000 | 18.160158000 | 18.036484000 | 6 | -1.907101000 | 20.870518000 | 18.780427000 |
| 1  | 12.554664000 | 18.861783000 | 16.777167000 | 6 | -2.914297000 | 19.738365000 | 18.787442000 |
| 6  | 8.335819000  | 18.427480000 | 21.779422000 | 8 | -3.661724000 | 19.518147000 | 17.796883000 |
| 6  | 7.240105000  | 17.817882000 | 22.661857000 | 6 | -0.433037000 | 20.421907000 | 18.939264000 |
| 8  | 7.427461000  | 17.546521000 | 23.847142000 | 6 | 0.461215000  | 21.676802000 | 18.990088000 |
| 6  | 9.749889000  | 18.123314000 | 22.289084000 | 6 | -0.028502000 | 19.443474000 | 17.826899000 |
| 6  | 10.179460000 | 16.643574000 | 22.226125000 | 6 | 1.941471000  | 21.390166000 | 19.256445000 |
| 6  | 10.235075000 | 16.101692000 | 20.789405000 | 1 | -2.034368000 | 21.409650000 | 17.839001000 |
| 6  | 11.536855000 | 16.459662000 | 22.921637000 | 1 | -0.331926000 | 19.897497000 | 19.900766000 |
| 1  | 8.182157000  | 19.516152000 | 21.777345000 | 1 | 0.358404000  | 22.224664000 | 18.042935000 |
| 1  | 9.805384000  | 18.455680000 | 23.331832000 | 1 | 0.084483000  | 22.350817000 | 19.771200000 |
| 1  | 10.468156000 | 18.729931000 | 21.717891000 | 1 | 0.995548000  | 19.084782000 | 17.966257000 |
| 1  | 9.434499000  | 16.063935000 | 22.787110000 | 1 | -0.093038000 | 19.924736000 | 16.841852000 |
| 1  | 10.556793000 | 15.052823000 | 20.778274000 | 1 | -0.673436000 | 18.557765000 | 17.821442000 |
| 1  | 9.261022000  | 16.148494000 | 20.290523000 | 1 | 2.493578000  | 22.325128000 | 19.399614000 |
| 1  | 10.949501000 | 16.673684000 | 20.180864000 | 1 | 2.075819000  | 20.776785000 | 20.156827000 |
| 1  | 11.845142000 | 15.406509000 | 22.921475000 | 1 | 2.408634000  | 20.857007000 | 18.422483000 |
| 1  | 11.497578000 | 16.798916000 | 23.963554000 | 7 | -2.979708000 | 18.993232000 | 19.904763000 |
| 1  | 12.321916000 | 17.034989000 | 22.411760000 | 6 | -3.706004000 | 17.721948000 | 20.020961000 |
| 7  | 6.048940000  | 17.619916000 | 22.028652000 | 6 | -3.085799000 | 16.703557000 | 19.018238000 |
| 6  | 4.837961000  | 17.180321000 | 22.705272000 | 8 | -1.880200000 | 16.480911000 | 19.038355000 |

|   |              |               |              |                                 |              |              |              |
|---|--------------|---------------|--------------|---------------------------------|--------------|--------------|--------------|
| 6 | -5.253134000 | 17.853670000  | 20.020109000 | 1                               | -1.040109000 | 18.091165000 | 12.112147000 |
| 8 | -5.795933000 | 18.091232000  | 18.712996000 | 1                               | 0.991191000  | 21.794404000 | 12.906429000 |
| 6 | -5.752483000 | 18.900014000  | 21.015484000 | 1                               | 1.064758000  | 19.316427000 | 12.657181000 |
| 1 | -2.340842000 | 19.197045000  | 20.677670000 | 1                               | 6.220749000  | 23.160531000 | 24.751840000 |
| 1 | -3.431143000 | 17.345723000  | 21.010934000 | 1                               | 3.563177000  | 23.154834000 | 24.189104000 |
| 1 | -5.645327000 | 16.871703000  | 20.316006000 | 1                               | 10.871259000 | 26.892979000 | 20.318017000 |
| 1 | -5.207134000 | 18.760264000  | 18.291258000 | 1                               | 10.450562000 | 25.385583000 | 22.530152000 |
| 1 | -6.845262000 | 18.931939000  | 20.985650000 | 1                               | 5.235379000  | 28.567188000 | 15.792379000 |
| 1 | -5.375082000 | 19.896157000  | 20.765361000 | 1                               | 7.881400000  | 28.683880000 | 16.391600000 |
| 1 | -5.428622000 | 18.660459000  | 22.035663000 | 1                               | 0.561091000  | 25.127827000 | 20.435132000 |
| 7 | -3.958026000 | 16.109206000  | 18.157831000 | 1                               | 0.960651000  | 26.526925000 | 18.148808000 |
| 6 | -3.515710000 | 15.352680000  | 17.001936000 | 1                               | 8.203774000  | 18.108462000 | 20.738528000 |
| 6 | -3.963525000 | 15.974326000  | 15.669660000 | 1                               | 4.409553000  | 16.331799000 | 22.159085000 |
| 8 | -4.153801000 | 15.273025000  | 14.683375000 | 1                               | 1.245545000  | 12.825896000 | 19.680703000 |
| 1 | -4.888738000 | 16.520977000  | 18.128588000 | 1                               | -1.348316000 | 16.627242000 | 22.138648000 |
| 1 | -2.422466000 | 15.302652000  | 17.037915000 | 1                               | -2.472939000 | 21.426201000 | 21.980608000 |
| 7 | -4.146954000 | 17.331760000  | 15.687796000 | 1                               | -1.800503000 | 25.980271000 | 21.737143000 |
| 6 | -4.515885000 | 18.070201000  | 14.495741000 | 1                               | -4.691178000 | 23.817268000 | 11.854834000 |
| 6 | -5.854451000 | 18.813530000  | 14.574821000 | 1                               | -2.170088000 | 21.576934000 | 19.578683000 |
| 8 | -6.117910000 | 19.707666000  | 13.769211000 | 1                               | 11.808876000 | 22.308238000 | 20.156469000 |
| 1 | -3.817755000 | 17.874655000  | 16.482656000 | 1                               | -6.794292000 | 26.852775000 | 16.900472000 |
| 1 | -3.750526000 | 18.808479000  | 14.239444000 | 1                               | -8.733057000 | 18.300017000 | 16.101633000 |
| 1 | -4.575376000 | 17.350727000  | 13.672869000 | 8                               | -3.593666000 | 27.601105000 | 18.169924000 |
| 7 | -6.725318000 | 18.396584000  | 15.531295000 | 1                               | -3.946540000 | 27.914199000 | 17.319054000 |
| 6 | -8.018132000 | 19.036676000  | 15.729773000 | 1                               | -4.304319000 | 27.017928000 | 18.548233000 |
| 6 | -7.974546000 | 20.186646000  | 16.753673000 | 1                               | -3.899186000 | 14.327460000 | 17.014608000 |
| 8 | -8.607898000 | 20.135416000  | 17.804675000 | 6                               | 4.762815000  | 19.173049000 | 18.304659000 |
| 1 | -6.381477000 | 17.783741000  | 16.259662000 | 8                               | 5.790800000  | 24.455002000 | 19.258714000 |
| 1 | -8.347803000 | 19.408353000  | 14.754850000 | 6                               | 11.944197000 | 25.368962000 | 17.469237000 |
| 7 | -7.160860000 | 21.213491000  | 16.396461000 | 1                               | 12.199599000 | 25.177955000 | 16.419637000 |
| 6 | -6.953848000 | 22.367705000  | 17.252618000 | 1                               | 10.903760000 | 25.705020000 | 17.519246000 |
| 6 | -6.831858000 | 23.610804000  | 16.358547000 | 1                               | 12.602352000 | 26.162677000 | 17.831625000 |
| 8 | -6.877337000 | 23.523276000  | 15.126027000 | 1                               | 4.392135000  | 28.353214000 | 20.869153000 |
| 6 | -5.696335000 | 22.204964000  | 18.127783000 |                                 |              |              |              |
| 8 | -4.510387000 | 22.282681000  | 17.333183000 |                                 |              |              |              |
| 1 | -6.832264000 | 21.289216000  | 15.437676000 |                                 |              |              |              |
| 1 | -7.824124000 | 22.462499000  | 17.912257000 |                                 |              |              |              |
| 1 | -5.641990000 | 22.977219000  | 18.901631000 |                                 |              |              |              |
| 1 | -5.764489000 | 21.235299000  | 18.635027000 |                                 |              |              |              |
| 1 | -4.250708000 | 21.374292000  | 17.094775000 |                                 |              |              |              |
| 7 | -6.659831000 | 24.784454000  | 17.012017000 |                                 |              |              |              |
| 6 | -6.473403000 | 26.015608000  | 16.275997000 |                                 |              |              |              |
| 6 | -5.046579000 | 26.326075000  | 15.809799000 |                                 |              |              |              |
| 8 | -4.794697000 | 27.437767000  | 15.336220000 |                                 |              |              |              |
| 1 | -6.385766000 | 24.849522000  | 18.005667000 |                                 |              |              |              |
| 1 | -7.096318000 | 25.996394000  | 15.376863000 |                                 |              |              |              |
| 7 | -4.132434000 | 25.333979000  | 15.933340000 |                                 |              |              |              |
| 6 | -2.776337000 | 25.449378000  | 15.411120000 |                                 |              |              |              |
| 6 | -2.639971000 | 24.832241000  | 14.001645000 |                                 |              |              |              |
| 8 | -1.698661000 | 25.160560000  | 13.278232000 |                                 |              |              |              |
| 6 | -1.758583000 | 24.937225000  | 16.479439000 |                                 |              |              |              |
| 8 | -1.487794000 | 25.951205000  | 17.433366000 |                                 |              |              |              |
| 6 | -0.413644000 | 24.497016000  | 15.909010000 |                                 |              |              |              |
| 1 | -4.376928000 | 24.496341000  | 16.454904000 |                                 |              |              |              |
| 1 | -2.574472000 | 26.5111912000 | 15.256445000 |                                 |              |              |              |
| 1 | -2.228009000 | 24.067369000  | 16.971796000 |                                 |              |              |              |
| 1 | -2.302025000 | 26.458157000  | 17.681935000 |                                 |              |              |              |
| 1 | 0.258927000  | 24.279420000  | 16.744485000 |                                 |              |              |              |
| 1 | 0.028499000  | 25.284889000  | 15.293571000 |                                 |              |              |              |
| 1 | -0.513966000 | 23.597973000  | 15.293398000 |                                 |              |              |              |
| 7 | -3.599414000 | 23.942866000  | 13.621988000 |                                 |              |              |              |
| 6 | -3.723927000 | 23.474038000  | 12.245657000 |                                 |              |              |              |
| 6 | -3.659365000 | 21.950443000  | 12.065771000 |                                 |              |              |              |
| 6 | -2.312106000 | 21.264889000  | 12.245853000 |                                 |              |              |              |
| 6 | -2.254505000 | 19.868986000  | 12.093902000 |                                 |              |              |              |
| 6 | -1.121194000 | 21.945714000  | 12.531371000 |                                 |              |              |              |
| 6 | -1.054085000 | 19.172106000  | 12.234211000 |                                 |              |              |              |
| 6 | 0.081935000  | 21.244394000  | 12.675546000 |                                 |              |              |              |
| 6 | 0.129085000  | 19.857040000  | 12.531530000 |                                 |              |              |              |
| 1 | -4.407135000 | 23.825699000  | 14.223836000 |                                 |              |              |              |
| 1 | -2.939967000 | 23.974874000  | 11.672850000 |                                 |              |              |              |
| 1 | -4.398603000 | 21.474941000  | 12.725260000 |                                 |              |              |              |
| 1 | -4.017100000 | 21.741626000  | 11.045681000 |                                 |              |              |              |
| 1 | -3.169301000 | 19.327154000  | 11.859125000 |                                 |              |              |              |
| 1 | -1.118487000 | 23.025533000  | 12.647505000 |                                 |              |              |              |
|   |              |               |              | TS1 <sup>4</sup> C <sub>6</sub> |              |              |              |
|   |              |               |              | 6                               | 3.582118000  | 27.189307000 | 17.766084000 |
|   |              |               |              | 6                               | 8.343231000  | 27.544556000 | 18.575604000 |
|   |              |               |              | 6                               | 7.838540000  | 24.956599000 | 22.639764000 |
|   |              |               |              | 6                               | 3.084898000  | 24.563214000 | 21.804325000 |
|   |              |               |              | 6                               | 4.932065000  | 27.482109000 | 17.618603000 |
|   |              |               |              | 6                               | 5.486162000  | 28.245490000 | 16.524431000 |
|   |              |               |              | 6                               | 6.824719000  | 28.342067000 | 16.751430000 |
|   |              |               |              | 6                               | 7.091728000  | 27.637310000 | 17.984490000 |
|   |              |               |              | 6                               | 8.620573000  | 26.891521000 | 19.774160000 |
|   |              |               |              | 6                               | 9.922819000  | 26.826988000 | 20.392979000 |
|   |              |               |              | 6                               | 9.778834000  | 26.098785000 | 21.536519000 |
|   |              |               |              | 6                               | 8.388080000  | 25.724853000 | 21.618794000 |
|   |              |               |              | 6                               | 6.501201000  | 24.597293000 | 22.750430000 |
|   |              |               |              | 6                               | 5.956538000  | 23.798755000 | 23.824956000 |
|   |              |               |              | 6                               | 4.619453000  | 23.682743000 | 23.588888000 |
|   |              |               |              | 6                               | 4.347522000  | 24.407912000 | 22.369542000 |
|   |              |               |              | 6                               | 2.820427000  | 25.278508000 | 20.647175000 |
|   |              |               |              | 6                               | 1.494616000  | 25.437847000 | 20.094898000 |
|   |              |               |              | 6                               | 1.625940000  | 26.171803000 | 18.957651000 |
|   |              |               |              | 6                               | 3.035664000  | 26.467720000 | 18.816565000 |
|   |              |               |              | 7                               | 5.925241000  | 27.115577000 | 18.485405000 |
|   |              |               |              | 7                               | 7.706298000  | 26.219463000 | 20.535842000 |
|   |              |               |              | 7                               | 5.503037000  | 24.945930000 | 21.877343000 |
|   |              |               |              | 7                               | 3.745768000  | 25.923248000 | 19.858906000 |
|   |              |               |              | 26                              | 5.712055000  | 25.992585000 | 20.137185000 |
|   |              |               |              | 1                               | 2.900634000  | 27.551041000 | 17.002633000 |
|   |              |               |              | 1                               | 9.170576000  | 28.037816000 | 18.072950000 |
|   |              |               |              | 1                               | 8.511045000  | 24.616541000 | 23.422048000 |
|   |              |               |              | 1                               | 2.234381000  | 24.102798000 | 22.298190000 |
|   |              |               |              | 6                               | 6.131569000  | 20.973432000 | 17.812930000 |
|   |              |               |              | 6                               | 6.976689000  | 21.942494000 | 17.208588000 |
|   |              |               |              | 6                               | 6.414368000  | 22.035678000 | 20.022997000 |
|   |              |               |              | 6                               | 5.872059000  | 21.051034000 | 19.222778000 |
|   |              |               |              | 6                               | 5.451884000  | 19.830716000 | 17.308103000 |
|   |              |               |              | 6                               | 7.506839000  | 22.936381000 | 17.993525000 |
|   |              |               |              | 6                               | 7.172078000  | 23.074322000 | 19.399544000 |
|   |              |               |              | 7                               | 5.078494000  | 19.959434000 | 19.546205000 |
|   |              |               |              | 1                               | 4.533186000  | 19.807645000 | 20.401090000 |
|   |              |               |              | 6                               | 5.448951000  | 19.355115000 | 15.878406000 |



|    |              |              |              |   |              |              |              |
|----|--------------|--------------|--------------|---|--------------|--------------|--------------|
| 6  | 5.124850000  | 17.862530000 | 15.657308000 | 6 | 2.230148000  | 16.243566000 | 19.409810000 |
| 7  | 3.726728000  | 17.502814000 | 15.828461000 | 8 | 2.185991000  | 16.630774000 | 20.626220000 |
| 6  | 2.834000000  | 17.649868000 | 14.813850000 | 8 | 2.808451000  | 16.853685000 | 18.480333000 |
| 6  | 1.416317000  | 17.198532000 | 15.130750000 | 1 | 2.335943000  | 13.911072000 | 20.775770000 |
| 8  | 3.145039000  | 18.099629000 | 13.706297000 | 1 | 1.991606000  | 14.516324000 | 18.176207000 |
| 1  | 3.401273000  | 17.143159000 | 16.727242000 | 1 | 0.479401000  | 15.217386000 | 18.735098000 |
| 8  | 8.367096000  | 23.907914000 | 17.534504000 | 7 | 0.084452000  | 15.176131000 | 21.746418000 |
| 6  | 8.264418000  | 24.275236000 | 16.161913000 | 6 | -1.154625000 | 15.554285000 | 22.411217000 |
| 1  | 4.140599000  | 18.400106000 | 18.457158000 | 6 | -1.041273000 | 15.428530000 | 23.940582000 |
| 1  | 7.201408000  | 21.880784000 | 16.149144000 | 8 | 0.132648000  | 16.140341000 | 24.385148000 |
| 1  | 6.231001000  | 22.079809000 | 21.091271000 | 6 | -1.007014000 | 13.987471000 | 24.445637000 |
| 1  | 7.856334000  | 23.653796000 | 20.006961000 | 1 | 0.718396000  | 15.912412000 | 21.409570000 |
| 1  | 4.743869000  | 19.939710000 | 15.272367000 | 1 | -1.963703000 | 14.917305000 | 22.039528000 |
| 1  | 6.442673000  | 19.543790000 | 15.445263000 | 1 | -1.883128000 | 15.960869000 | 24.399494000 |
| 1  | 5.719549000  | 17.245302000 | 16.340414000 | 1 | 0.842401000  | 15.841112000 | 23.784940000 |
| 1  | 5.402928000  | 17.606132000 | 14.630243000 | 1 | -0.862663000 | 13.972888000 | 25.531679000 |
| 1  | 0.728492000  | 18.028797000 | 14.943805000 | 1 | -0.195764000 | 13.426872000 | 23.970869000 |
| 1  | 1.298962000  | 16.857094000 | 16.162363000 | 1 | -1.942700000 | 13.470656000 | 24.204043000 |
| 1  | 1.142392000  | 16.389713000 | 14.443895000 | 6 | -1.881114000 | 21.945113000 | 22.730028000 |
| 1  | 8.820620000  | 25.280560000 | 16.055972000 | 6 | -1.569006000 | 23.350334000 | 22.196621000 |
| 1  | 7.216175000  | 24.440647000 | 15.892025000 | 8 | -0.419791000 | 23.811199000 | 22.245356000 |
| 1  | 8.700979000  | 23.513034000 | 15.502910000 | 6 | -0.598396000 | 21.160608000 | 23.019910000 |
| 16 | 5.499093000  | 27.962946000 | 21.495956000 | 6 | -0.823819000 | 19.662487000 | 23.162827000 |
| 6  | 12.280417000 | 24.139212000 | 18.442055000 | 8 | -1.590087000 | 19.035787000 | 22.414924000 |
| 8  | 13.394702000 | 23.861332000 | 18.884348000 | 7 | -0.123363000 | 19.046966000 | 24.140995000 |
| 7  | 11.189484000 | 23.349104000 | 18.630196000 | 1 | -2.489691000 | 22.035926000 | 23.639820000 |
| 6  | 11.261092000 | 22.127568000 | 19.424947000 | 1 | -0.096064000 | 21.569247000 | 23.902601000 |
| 6  | 11.913896000 | 20.917881000 | 18.731401000 | 1 | 0.102108000  | 21.301890000 | 22.187649000 |
| 6  | 11.102294000 | 20.221682000 | 17.619080000 | 1 | 0.552462000  | 19.569534000 | 24.678253000 |
| 6  | 10.980981000 | 21.058432000 | 16.335553000 | 1 | -0.090936000 | 18.023133000 | 24.199090000 |
| 6  | 11.721912000 | 18.851861000 | 17.295880000 | 7 | -2.620696000 | 24.023063000 | 21.696423000 |
| 1  | 10.282305000 | 23.657447000 | 18.293930000 | 6 | -2.509541000 | 25.366786000 | 21.131339000 |
| 1  | 10.238745000 | 21.879290000 | 19.731599000 | 6 | -3.889007000 | 26.044957000 | 21.099734000 |
| 1  | 12.111003000 | 20.178154000 | 19.521655000 | 6 | -4.910993000 | 25.231176000 | 20.275820000 |
| 1  | 12.894800000 | 21.227190000 | 18.348577000 | 8 | -5.386642000 | 25.774424000 | 19.225615000 |
| 1  | 10.085354000 | 20.046019000 | 18.002490000 | 8 | -5.187204000 | 24.076849000 | 20.691144000 |
| 1  | 10.423390000 | 20.508578000 | 15.566933000 | 1 | -3.547782000 | 23.604477000 | 21.573672000 |
| 1  | 11.973948000 | 21.290980000 | 15.927477000 | 1 | -2.091906000 | 25.324444000 | 20.115544000 |
| 1  | 10.465518000 | 22.004954000 | 16.514897000 | 1 | -3.775276000 | 27.050996000 | 20.688233000 |
| 1  | 11.146818000 | 18.328139000 | 16.522575000 | 1 | -4.268570000 | 26.129818000 | 22.126694000 |
| 1  | 11.756401000 | 18.207283000 | 18.182957000 | 6 | -1.918723000 | 20.848747000 | 18.802167000 |
| 1  | 12.750658000 | 18.964652000 | 16.927128000 | 6 | -2.916330000 | 19.708464000 | 18.798728000 |
| 6  | 8.322544000  | 18.418918000 | 22.018106000 | 8 | -3.654650000 | 19.485440000 | 17.801765000 |
| 6  | 7.191241000  | 17.773073000 | 22.822718000 | 6 | -0.441359000 | 20.411721000 | 18.962233000 |
| 8  | 7.377650000  | 17.323199000 | 23.953048000 | 6 | 0.441431000  | 21.674616000 | 19.011830000 |
| 6  | 9.657737000  | 17.681156000 | 22.193992000 | 6 | -0.026446000 | 19.436090000 | 17.851401000 |
| 6  | 9.691430000  | 16.230613000 | 21.671871000 | 6 | 1.922772000  | 21.402066000 | 19.285583000 |
| 6  | 9.416069000  | 16.133094000 | 20.163609000 | 1 | -2.047810000 | 21.392829000 | 17.863931000 |
| 6  | 11.038537000 | 15.578159000 | 22.018149000 | 1 | -0.336422000 | 19.888925000 | 19.924258000 |
| 1  | 8.435173000  | 19.444570000 | 22.396134000 | 1 | 0.337131000  | 22.217459000 | 18.061947000 |
| 1  | 9.890203000  | 17.670117000 | 23.265072000 | 1 | 0.055539000  | 22.348132000 | 19.788881000 |
| 1  | 10.449099000 | 18.261472000 | 21.696770000 | 1 | 0.999668000  | 19.085089000 | 17.994537000 |
| 1  | 8.905411000  | 15.674177000 | 22.201180000 | 1 | -0.091581000 | 19.916523000 | 16.865983000 |
| 1  | 9.476378000  | 15.092528000 | 19.821668000 | 1 | -0.664703000 | 18.545546000 | 17.844355000 |
| 1  | 8.419789000  | 16.504557000 | 19.901600000 | 1 | 2.466596000  | 22.342914000 | 19.422283000 |
| 1  | 10.151413000 | 16.713954000 | 19.589878000 | 1 | 2.058108000  | 20.798391000 | 20.192153000 |
| 1  | 11.067086000 | 14.529430000 | 21.696775000 | 1 | 2.397676000  | 20.864873000 | 18.458688000 |
| 1  | 11.227736000 | 15.604855000 | 23.098083000 | 7 | -2.983818000 | 18.959112000 | 19.912918000 |
| 1  | 11.867566000 | 16.100123000 | 21.520708000 | 6 | -3.702666000 | 17.682784000 | 20.020808000 |
| 7  | 5.980844000  | 17.754515000 | 22.198245000 | 6 | -3.067787000 | 16.670435000 | 19.021198000 |
| 6  | 4.754308000  | 17.286054000 | 22.824557000 | 8 | -1.861431000 | 16.453727000 | 19.052295000 |
| 6  | 3.667958000  | 18.377977000 | 22.868531000 | 6 | -5.250551000 | 17.804512000 | 20.008098000 |
| 8  | 3.372262000  | 18.837096000 | 21.554274000 | 8 | -5.785126000 | 18.040593000 | 18.697432000 |
| 6  | 4.051270000  | 19.585353000 | 23.717661000 | 6 | -5.764269000 | 18.846303000 | 21.000997000 |
| 1  | 5.896285000  | 18.164797000 | 21.277229000 | 1 | -2.352681000 | 19.165431000 | 20.691514000 |
| 1  | 5.020190000  | 16.947826000 | 23.829464000 | 1 | -3.433101000 | 17.306634000 | 21.012225000 |
| 1  | 2.766249000  | 17.912169000 | 23.299705000 | 1 | -5.638517000 | 16.819535000 | 20.299533000 |
| 1  | 2.916792000  | 18.081397000 | 21.072628000 | 1 | -5.198339000 | 18.715276000 | 18.282075000 |
| 1  | 3.243099000  | 20.324214000 | 23.698050000 | 1 | -6.857056000 | 18.869777000 | 20.964343000 |
| 1  | 4.953945000  | 20.067623000 | 23.327978000 | 1 | -5.393166000 | 19.845514000 | 20.753575000 |
| 1  | 4.243844000  | 19.290522000 | 24.755635000 | 1 | -5.444804000 | 18.608864000 | 22.023054000 |
| 6  | 1.419925000  | 13.869384000 | 20.172085000 | 7 | -3.928613000 | 16.074355000 | 18.150334000 |
| 6  | 0.209983000  | 13.974096000 | 21.102781000 | 6 | -3.470657000 | 15.324553000 | 16.996119000 |
| 8  | -0.575378000 | 13.040657000 | 21.262491000 | 6 | -3.906065000 | 15.950018000 | 15.661474000 |
| 6  | 1.493125000  | 14.938590000 | 19.054499000 | 8 | -4.081463000 | 15.252367000 | 14.669859000 |

|   |              |              |              |
|---|--------------|--------------|--------------|
| 1 | -4.861588000 | 16.480492000 | 18.113946000 |
| 1 | -2.377675000 | 15.278725000 | 17.043985000 |
| 7 | -4.096306000 | 17.306462000 | 15.683609000 |
| 6 | -4.453991000 | 18.048970000 | 14.490735000 |
| 6 | -5.796141000 | 18.786982000 | 14.558328000 |
| 8 | -6.053057000 | 19.686143000 | 13.756101000 |
| 1 | -3.780104000 | 17.847345000 | 16.485121000 |
| 1 | -3.688264000 | 18.791076000 | 14.246630000 |
| 1 | -4.501561000 | 17.332986000 | 13.664015000 |
| 7 | -6.677526000 | 18.359581000 | 15.500359000 |
| 6 | -7.976379000 | 18.991867000 | 15.685487000 |
| 6 | -7.949873000 | 20.141822000 | 16.710137000 |
| 8 | -8.587524000 | 20.083457000 | 17.758277000 |
| 1 | -6.340572000 | 17.742527000 | 16.228363000 |
| 1 | -8.298657000 | 19.361514000 | 14.707323000 |
| 7 | -7.145454000 | 21.176941000 | 16.357136000 |
| 6 | -6.946108000 | 22.328849000 | 17.217967000 |
| 6 | -6.822079000 | 23.575036000 | 16.328515000 |
| 8 | -6.865548000 | 23.492276000 | 15.095836000 |
| 6 | -5.693183000 | 22.165577000 | 18.099386000 |
| 8 | -4.504290000 | 22.242865000 | 17.308935000 |
| 1 | -6.805843000 | 21.252438000 | 15.402249000 |
| 1 | -7.820410000 | 22.419772000 | 17.872838000 |
| 1 | -5.641990000 | 22.937205000 | 18.874087000 |
| 1 | -5.763867000 | 21.195710000 | 18.605840000 |
| 1 | -4.236164000 | 21.333395000 | 17.084258000 |
| 7 | -6.650923000 | 24.746691000 | 16.986502000 |
| 6 | -6.463899000 | 25.980062000 | 16.254485000 |
| 6 | -5.035657000 | 26.295033000 | 15.795787000 |
| 8 | -4.783989000 | 27.408903000 | 15.327217000 |
| 1 | -6.380177000 | 24.808557000 | 17.981038000 |
| 1 | -7.082539000 | 25.961305000 | 15.352420000 |
| 7 | -4.119771000 | 25.304596000 | 15.920654000 |
| 6 | -2.759838000 | 25.426945000 | 15.409951000 |
| 6 | -2.606942000 | 24.809820000 | 14.002266000 |
| 8 | -1.664051000 | 25.147670000 | 13.285421000 |
| 6 | -1.748376000 | 24.920207000 | 16.486479000 |
| 8 | -1.492708000 | 25.935275000 | 17.443789000 |
| 6 | -0.395821000 | 24.489135000 | 15.927096000 |
| 1 | -4.365281000 | 24.465302000 | 16.439029000 |
| 1 | -2.562756000 | 26.490543000 | 15.256703000 |
| 1 | -2.216390000 | 24.047088000 | 16.974307000 |
| 1 | -2.311697000 | 26.438308000 | 17.685492000 |
| 1 | 0.271006000  | 24.273154000 | 16.767564000 |
| 1 | 0.047136000  | 25.280850000 | 15.317202000 |
| 1 | -0.485514000 | 23.590767000 | 15.308947000 |
| 7 | -3.553177000 | 23.908687000 | 13.617407000 |
| 6 | -3.661087000 | 23.434634000 | 12.241362000 |
| 6 | -3.575835000 | 21.911510000 | 12.065888000 |
| 6 | -2.221727000 | 21.242992000 | 12.258893000 |
| 6 | -2.146053000 | 19.847170000 | 12.113990000 |
| 6 | -1.040973000 | 21.939384000 | 12.549071000 |
| 6 | -0.938237000 | 19.165564000 | 12.265389000 |
| 6 | 0.169623000  | 21.253475000 | 12.704538000 |
| 6 | 0.234568000  | 19.866187000 | 12.567235000 |
| 1 | -4.364309000 | 23.784770000 | 14.213128000 |
| 1 | -2.879081000 | 23.944090000 | 11.673523000 |
| 1 | -4.315082000 | 21.428610000 | 12.719950000 |
| 1 | -3.922169000 | 21.696112000 | 11.043211000 |
| 1 | -3.052264000 | 19.292840000 | 11.875061000 |
| 1 | -1.051891000 | 23.019664000 | 12.660277000 |
| 1 | -0.910468000 | 18.084331000 | 12.148643000 |
| 1 | 1.070564000  | 21.815537000 | 12.938861000 |
| 1 | 1.176070000  | 19.337816000 | 12.701433000 |
| 1 | 6.534802000  | 23.395983000 | 24.647519000 |
| 1 | 3.870738000  | 23.165694000 | 24.175468000 |
| 1 | 10.819930000 | 27.284642000 | 19.95124000  |
| 1 | 10.534090000 | 25.831284000 | 22.265103000 |
| 1 | 4.906814000  | 28.650822000 | 15.704232000 |
| 1 | 7.576175000  | 28.847561000 | 16.156880000 |
| 1 | 0.604581000  | 25.027705000 | 20.554285000 |
| 1 | 0.842962000  | 26.471521000 | 18.270792000 |
| 1 | 8.049431000  | 18.513751000 | 20.960962000 |
| 1 | 4.354321000  | 16.434576000 | 22.260451000 |
| 1 | 1.360840000  | 12.871248000 | 19.729771000 |

|   |              |              |              |
|---|--------------|--------------|--------------|
| 1 | -1.366722000 | 16.597940000 | 22.162094000 |
| 1 | -2.498683000 | 21.398676000 | 22.009149000 |
| 1 | -1.807667000 | 25.942416000 | 21.742987000 |
| 1 | -4.629506000 | 23.764643000 | 21.842225000 |
| 1 | -2.189628000 | 21.548093000 | 19.604016000 |
| 1 | 11.836304000 | 22.353248000 | 20.330040000 |
| 1 | -6.789597000 | 26.815250000 | 16.879178000 |
| 1 | -8.690032000 | 18.250428000 | 16.050113000 |
| 8 | -3.606423000 | 27.575728000 | 18.166269000 |
| 1 | -3.956756000 | 27.887486000 | 17.313813000 |
| 1 | -4.314883000 | 26.987064000 | 18.540666000 |
| 1 | -3.850135000 | 14.297773000 | 17.000239000 |
| 6 | 4.804989000  | 19.257104000 | 18.400672000 |
| 8 | 5.994079000  | 24.542474000 | 19.265829000 |
| 6 | 12.039121000 | 25.386132000 | 17.597327000 |
| 1 | 12.700876000 | 26.180422000 | 17.951645000 |
| 1 | 12.301700000 | 25.173945000 | 16.553529000 |
| 1 | 11.001399000 | 25.731637000 | 17.632999000 |
| 1 | 4.268259000  | 27.688161000 | 21.983742000 |

# IM1<sup>2</sup>C<sub>6</sub>

|    |              |              |              |
|----|--------------|--------------|--------------|
| 6  | 6.440845000  | 27.177957000 | 20.454796000 |
| 6  | 10.780520000 | 28.560678000 | 18.831598000 |
| 6  | 12.854221000 | 25.280653000 | 21.724707000 |
| 6  | 8.497041000  | 23.761191000 | 23.204268000 |
| 6  | 7.447680000  | 27.859915000 | 19.780128000 |
| 6  | 7.210668000  | 28.933607000 | 18.835976000 |
| 6  | 8.429070000  | 29.317991000 | 18.371144000 |
| 6  | 9.407583000  | 28.480789000 | 19.034805000 |
| 6  | 11.730573000 | 27.773314000 | 19.472669000 |
| 6  | 13.159138000 | 27.895656000 | 19.281681000 |
| 6  | 13.742550000 | 26.984754000 | 20.109788000 |
| 6  | 12.666319000 | 26.301258000 | 20.797010000 |
| 6  | 11.845836000 | 24.575565000 | 22.373375000 |
| 6  | 12.078734000 | 23.516252000 | 23.329099000 |
| 6  | 10.854479000 | 23.076600000 | 23.735520000 |
| 6  | 9.873346000  | 23.872282000 | 23.034603000 |
| 6  | 7.547965000  | 24.567589000 | 22.582492000 |
| 6  | 6.119645000  | 24.468735000 | 22.787963000 |
| 6  | 5.546587000  | 25.435065000 | 22.017377000 |
| 6  | 6.624244000  | 26.121612000 | 21.339600000 |
| 7  | 8.786110000  | 27.611102000 | 19.884524000 |
| 7  | 11.460395000 | 26.797249000 | 20.390982000 |
| 7  | 10.498100000 | 24.767086000 | 22.200238000 |
| 7  | 7.828054000  | 25.572610000 | 21.695240000 |
| 26 | 9.639594000  | 26.191130000 | 21.043548000 |
| 1  | 5.418074000  | 27.493232000 | 20.269437000 |
| 1  | 11.140030000 | 29.304470000 | 18.125939000 |
| 1  | 13.878581000 | 25.014034000 | 21.969786000 |
| 1  | 8.136560000  | 23.005155000 | 23.896098000 |
| 6  | 8.802793000  | 22.146399000 | 17.106352000 |
| 6  | 10.140385000 | 22.655339000 | 17.145924000 |
| 6  | 8.255669000  | 23.105440000 | 19.310371000 |
| 6  | 7.895304000  | 22.408956000 | 18.212438000 |
| 6  | 8.112442000  | 21.386283000 | 16.160336000 |
| 6  | 10.542565000 | 23.350391000 | 18.246970000 |
| 6  | 9.636176000  | 23.703291000 | 19.422711000 |
| 7  | 6.674778000  | 21.804470000 | 17.877608000 |
| 1  | 5.835772000  | 21.664541000 | 18.473091000 |
| 6  | 8.636033000  | 20.830179000 | 14.863911000 |
| 6  | 8.532343000  | 19.290328000 | 14.724043000 |
| 7  | 7.185646000  | 18.807911000 | 14.481851000 |
| 6  | 6.686169000  | 18.767492000 | 13.212987000 |
| 6  | 5.252286000  | 18.267231000 | 13.104629000 |
| 8  | 7.345036000  | 19.090813000 | 12.223830000 |
| 1  | 6.568314000  | 18.587183000 | 15.269719000 |
| 8  | 11.777230000 | 23.863475000 | 18.420865000 |
| 6  | 12.624344000 | 24.003201000 | 17.281987000 |
| 1  | 5.992599000  | 20.596615000 | 16.314566000 |
| 1  | 10.803100000 | 22.476618000 | 16.306814000 |
| 1  | 7.570158000  | 23.326919000 | 20.121368000 |
| 1  | 10.109498000 | 23.283330000 | 20.335110000 |
| 1  | 8.118551000  | 21.272129000 | 14.003544000 |
| 1  | 9.692302000  | 21.110753000 | 14.763452000 |

|    |              |              |              |   |               |              |              |
|----|--------------|--------------|--------------|---|---------------|--------------|--------------|
| 1  | 8.921802000  | 18.805666000 | 15.626721000 | 1 | 1.424826000   | 17.186363000 | 20.817573000 |
| 1  | 9.146384000  | 18.985100000 | 13.871708000 | 1 | -0.368844000  | 14.955563000 | 21.729331000 |
| 1  | 4.695290000  | 18.936604000 | 12.442333000 | 1 | 1.154076000   | 14.626945000 | 20.864502000 |
| 1  | 4.752820000  | 18.208678000 | 14.075320000 | 1 | -0.380484000  | 14.083601000 | 20.177272000 |
| 1  | 5.253152000  | 17.274932000 | 12.638511000 | 6 | -1.583348000  | 22.815125000 | 22.913291000 |
| 1  | 13.458670000 | 24.624043000 | 17.610558000 | 6 | -1.022809000  | 23.232531000 | 21.549021000 |
| 1  | 12.087463000 | 24.505684000 | 16.470209000 | 8 | 0.165374000   | 23.042946000 | 21.251789000 |
| 1  | 12.992954000 | 23.030281000 | 16.934482000 | 6 | -0.824076000  | 21.634181000 | 23.518006000 |
| 16 | 9.743293000  | 27.747946000 | 22.763703000 | 6 | -1.033118000  | 20.352654000 | 22.715115000 |
| 6  | 14.967979000 | 21.898736000 | 20.414115000 | 8 | -2.102503000  | 20.161360000 | 22.109171000 |
| 8  | 15.650312000 | 21.032628000 | 20.957201000 | 7 | -0.033950000  | 19.457948000 | 22.754634000 |
| 7  | 13.611823000 | 21.809350000 | 20.307318000 | 1 | -1.502522000  | 23.679910000 | 23.585809000 |
| 6  | 12.871007000 | 20.715267000 | 20.932216000 | 1 | -1.190563000  | 21.448947000 | 24.537238000 |
| 6  | 12.884025000 | 19.375570000 | 20.176115000 | 1 | 0.243492000   | 21.857547000 | 23.591125000 |
| 6  | 12.186137000 | 19.347531000 | 18.797474000 | 1 | 0.880252000   | 19.728482000 | 23.122374000 |
| 6  | 13.092018000 | 19.864545000 | 17.668130000 | 1 | -0.078084000  | 18.641897000 | 22.143849000 |
| 6  | 11.696823000 | 17.927626000 | 18.469015000 | 7 | -1.903969000  | 23.859695000 | 20.746265000 |
| 1  | 13.089179000 | 22.598706000 | 19.946803000 | 6 | -1.569951000  | 24.353179000 | 19.416348000 |
| 1  | 11.841447000 | 21.062445000 | 21.067967000 | 6 | -2.610296000  | 25.378657000 | 18.942875000 |
| 1  | 12.384732000 | 18.653555000 | 20.838586000 | 6 | -4.062386000  | 24.842349000 | 18.928965000 |
| 1  | 13.923371000 | 19.037331000 | 20.079983000 | 8 | -4.747630000  | 25.070327000 | 17.879820000 |
| 1  | 11.301600000 | 20.001067000 | 18.847079000 | 8 | -4.480734000  | 24.245343000 | 19.952105000 |
| 1  | 12.559846000 | 19.867412000 | 16.708518000 | 1 | -2.912914000  | 23.862142000 | 20.927606000 |
| 1  | 13.975939000 | 19.222171000 | 17.557554000 | 1 | -1.521163000  | 23.520460000 | 18.700927000 |
| 1  | 13.444936000 | 20.879811000 | 17.869670000 | 1 | -2.336342000  | 25.727794000 | 17.943236000 |
| 1  | 11.199709000 | 17.893821000 | 17.491661000 | 1 | -2.587525000  | 26.246806000 | 19.617010000 |
| 1  | 10.984522000 | 17.565566000 | 19.219922000 | 6 | -2.982945000  | 20.471825000 | 18.543295000 |
| 1  | 12.537549000 | 17.221337000 | 18.438626000 | 6 | -4.003945000  | 19.510802000 | 19.107042000 |
| 6  | 4.977127000  | 20.460160000 | 23.934946000 | 8 | -5.094562000  | 19.277860000 | 18.514069000 |
| 6  | 3.667574000  | 20.461594000 | 23.144465000 | 6 | -1.785205000  | 19.745949000 | 17.865833000 |
| 8  | 2.586697000  | 20.292017000 | 23.727684000 | 6 | -0.825673000  | 20.812625000 | 17.298058000 |
| 6  | 5.031875000  | 19.325258000 | 24.969711000 | 6 | -2.268516000  | 18.754530000 | 16.796075000 |
| 6  | 5.026620000  | 17.895997000 | 24.391455000 | 6 | 0.462254000   | 20.259325000 | 16.675431000 |
| 6  | 6.245231000  | 17.609325000 | 23.500659000 | 1 | -3.482526000  | 21.108454000 | 17.806268000 |
| 6  | 4.936737000  | 16.868212000 | 25.529796000 | 1 | -1.249171000  | 19.182731000 | 18.644871000 |
| 1  | 5.025651000  | 21.420612000 | 24.466242000 | 1 | -1.371027000  | 21.408054000 | 16.553988000 |
| 1  | 4.163643000  | 19.440191000 | 25.628553000 | 1 | -0.554191000  | 21.498436000 | 18.112510000 |
| 1  | 5.929177000  | 19.458141000 | 25.591783000 | 1 | -1.424763000  | 18.257587000 | 16.305330000 |
| 1  | 4.120829000  | 17.791046000 | 23.777374000 | 1 | -2.850281000  | 19.274361000 | 16.025454000 |
| 1  | 6.223280000  | 16.578034000 | 23.128559000 | 1 | -2.895537000  | 17.969260000 | 17.231405000 |
| 1  | 6.282968000  | 18.268067000 | 22.626231000 | 1 | 1.120674000   | 21.078781000 | 16.363664000 |
| 1  | 7.181069000  | 17.740881000 | 24.061149000 | 1 | 1.025787000   | 19.638212000 | 17.384244000 |
| 1  | 4.883961000  | 15.845136000 | 25.138180000 | 1 | 0.263340000   | 19.650711000 | 15.786338000 |
| 1  | 4.047993000  | 17.037827000 | 26.149144000 | 7 | -3.681673000  | 18.894716000 | 20.252564000 |
| 1  | 5.817364000  | 16.928729000 | 26.184081000 | 6 | -4.471465000  | 17.830746000 | 20.872507000 |
| 7  | 3.783494000  | 20.678527000 | 21.820971000 | 6 | -4.585727000  | 16.644492000 | 19.870620000 |
| 6  | 2.679108000  | 20.736841000 | 20.868798000 | 8 | -3.581959000  | 16.169100000 | 19.349577000 |
| 6  | 3.169484000  | 21.443530000 | 19.590568000 | 6 | -5.791934000  | 18.321647000 | 21.529134000 |
| 8  | 4.444511000  | 20.900328000 | 19.210648000 | 8 | -6.817170000  | 18.597231000 | 20.557597000 |
| 6  | 3.308608000  | 22.950712000 | 19.764828000 | 6 | -5.579400000  | 19.525263000 | 22.444781000 |
| 1  | 4.699397000  | 20.694127000 | 21.387980000 | 1 | -2.883960000  | 19.244027000 | 20.798265000 |
| 1  | 1.836851000  | 21.283410000 | 21.300055000 | 1 | -3.841043000  | 17.457826000 | 21.687303000 |
| 1  | 2.437901000  | 21.238871000 | 18.798484000 | 1 | -6.181060000  | 17.484988000 | 22.124656000 |
| 1  | 4.306283000  | 19.967779000 | 18.855656000 | 1 | -6.367440000  | 19.036548000 | 19.800042000 |
| 1  | 3.646405000  | 23.410864000 | 18.829322000 | 1 | -6.538492000  | 19.813824000 | 22.884317000 |
| 1  | 4.036972000  | 23.192215000 | 20.547892000 | 1 | -5.182557000  | 20.378875000 | 21.888077000 |
| 1  | 2.340800000  | 23.377904000 | 20.045536000 | 1 | -4.866878000  | 19.292970000 | 23.244599000 |
| 6  | 4.383359000  | 15.516721000 | 18.443793000 | 7 | -5.846775000  | 16.182171000 | 19.643183000 |
| 6  | 2.885391000  | 15.211350000 | 18.520935000 | 6 | -6.160189000  | 15.291189000 | 18.539896000 |
| 8  | 2.444513000  | 14.071196000 | 18.388948000 | 6 | -7.195904000  | 15.890215000 | 17.572946000 |
| 6  | 4.800597000  | 16.403506000 | 17.251886000 | 8 | -7.998224000  | 15.170655000 | 16.991239000 |
| 6  | 4.693970000  | 17.930623000 | 17.445288000 | 1 | -6.592626000  | 16.793657000 | 19.966949000 |
| 8  | 4.041331000  | 18.366059000 | 18.447556000 | 1 | -5.225903000  | 15.078280000 | 18.009021000 |
| 8  | 5.272847000  | 18.646451000 | 16.589412000 | 7 | -7.154706000  | 17.253021000 | 17.442476000 |
| 1  | 4.705753000  | 15.999477000 | 19.374259000 | 6 | -8.035381000  | 17.955752000 | 16.527024000 |
| 1  | 5.846997000  | 16.199570000 | 16.995763000 | 6 | -9.188281000  | 18.745642000 | 17.156987000 |
| 1  | 4.224893000  | 16.137587000 | 16.354939000 | 8 | -9.941975000  | 19.403772000 | 16.434910000 |
| 7  | 2.094246000  | 16.303765000 | 18.748177000 | 1 | -6.356099000  | 17.763360000 | 17.812523000 |
| 6  | 0.640327000  | 16.248540000 | 18.633032000 | 1 | -7.461167000  | 18.675769000 | 15.936231000 |
| 6  | -0.055057000 | 16.223338000 | 20.006044000 | 1 | -8.468885000  | 17.231339000 | 15.833808000 |
| 8  | 0.458637000  | 17.305384000 | 20.806090000 | 7 | -9.339641000  | 18.680836000 | 18.505482000 |
| 6  | 0.098128000  | 14.892198000 | 20.740349000 | 6 | -10.292282000 | 19.547558000 | 19.194410000 |
| 1  | 2.573030000  | 17.207450000 | 18.701097000 | 6 | -9.631765000  | 20.884471000 | 19.581198000 |
| 1  | 0.371034000  | 15.358303000 | 18.057409000 | 8 | -9.383187000  | 21.164966000 | 20.751497000 |
| 1  | -1.117391000 | 16.444088000 | 19.864257000 | 1 | -8.593691000  | 18.275817000 | 19.059412000 |

|   |               |              |              |
|---|---------------|--------------|--------------|
| 1 | -11.139483000 | 19.700263000 | 18.520712000 |
| 7 | -9.295932000  | 21.660855000 | 18.519257000 |
| 6 | -8.265826000  | 22.681193000 | 18.619121000 |
| 6 | -8.345969000  | 23.568476000 | 17.366250000 |
| 8 | -9.193860000  | 23.373410000 | 16.489300000 |
| 6 | -6.872678000  | 22.040555000 | 18.723376000 |
| 8 | -6.597992000  | 21.418573000 | 17.464217000 |
| 1 | -9.533866000  | 21.358805000 | 17.579158000 |
| 1 | -8.441599000  | 23.278836000 | 19.519652000 |
| 1 | -6.111948000  | 22.785851000 | 18.990041000 |
| 1 | -6.907608000  | 21.298612000 | 19.530697000 |
| 1 | -5.886376000  | 20.764018000 | 17.610254000 |
| 7 | -7.408409000  | 24.543399000 | 17.292613000 |
| 6 | -7.269303000  | 25.340387000 | 16.095708000 |
| 6 | -6.458065000  | 24.715166000 | 14.957020000 |
| 8 | -6.115768000  | 25.423948000 | 14.004957000 |
| 1 | -6.567149000  | 24.565774000 | 17.887679000 |
| 1 | -8.261242000  | 25.558115000 | 15.688112000 |
| 7 | -6.196995000  | 23.383731000 | 15.030228000 |
| 6 | -5.532672000  | 22.712844000 | 13.925546000 |
| 6 | -6.537932000  | 22.045234000 | 12.961383000 |
| 8 | -6.189387000  | 21.698797000 | 11.829184000 |
| 6 | -4.452490000  | 21.703971000 | 14.431530000 |
| 8 | -3.810720000  | 22.182330000 | 15.598324000 |
| 6 | -3.442031000  | 21.377900000 | 13.327981000 |
| 1 | -6.271002000  | 22.889571000 | 15.920522000 |
| 1 | -5.040887000  | 23.488078000 | 13.330658000 |
| 1 | -4.963186000  | 20.780506000 | 14.737387000 |
| 1 | -3.579017000  | 23.141972000 | 15.487033000 |
| 1 | -2.738530000  | 20.618715000 | 13.686191000 |
| 1 | -2.869116000  | 22.278143000 | 13.072739000 |
| 1 | -3.942018000  | 21.019581000 | 12.424198000 |
| 7 | -7.792601000  | 21.859197000 | 13.448889000 |
| 6 | -8.912217000  | 21.423221000 | 12.624092000 |
| 6 | -9.558365000  | 20.098951000 | 13.059032000 |
| 6 | -8.832732000  | 18.802930000 | 12.729715000 |
| 6 | -9.417921000  | 17.596471000 | 13.152892000 |
| 6 | -7.628323000  | 18.739274000 | 12.017117000 |
| 6 | -8.827649000  | 16.365550000 | 12.871100000 |
| 6 | -7.033961000  | 17.503480000 | 11.735551000 |
| 6 | -7.627292000  | 16.314316000 | 12.155907000 |
| 1 | -8.007647000  | 22.256197000 | 14.357879000 |
| 1 | -8.550348000  | 21.376157000 | 11.594008000 |
| 1 | -9.748161000  | 20.126468000 | 14.140046000 |
| 1 | -10.552414000 | 20.060280000 | 12.587174000 |
| 1 | -10.343313000 | 17.632687000 | 13.724395000 |
| 1 | -7.132467000  | 19.649450000 | 11.691790000 |
| 1 | -9.295908000  | 15.448483000 | 13.220607000 |
| 1 | -6.094260000  | 17.479642000 | 11.188430000 |
| 1 | -7.157872000  | 15.357490000 | 11.940186000 |
| 1 | 13.056789000  | 23.168158000 | 23.638057000 |
| 1 | 10.621042000  | 22.296529000 | 24.449979000 |
| 1 | 13.634526000  | 28.601154000 | 18.610734000 |
| 1 | 14.797214000  | 26.788993000 | 20.263406000 |
| 1 | 6.233459000   | 29.320289000 | 18.574144000 |
| 1 | 8.664285000   | 30.089826000 | 17.648402000 |
| 1 | 5.634176000   | 23.754718000 | 23.441695000 |
| 1 | 4.495841000   | 25.672491000 | 21.908173000 |
| 1 | 5.841780000   | 20.433409000 | 23.261521000 |
| 1 | 2.340650000   | 19.720976000 | 20.622499000 |
| 1 | 4.879232000   | 14.544854000 | 18.373372000 |
| 1 | 0.308472000   | 17.136553000 | 18.085339000 |
| 1 | -2.645845000  | 22.570870000 | 22.822466000 |
| 1 | -0.570602000  | 24.799248000 | 19.449911000 |
| 1 | -9.684165000  | 22.202724000 | 12.667281000 |
| 1 | -2.608900000  | 21.107314000 | 19.355213000 |
| 1 | 13.295448000  | 20.551004000 | 21.928948000 |
| 1 | -6.783015000  | 26.283582000 | 16.352578000 |
| 1 | -10.628336000 | 19.061703000 | 20.112284000 |
| 8 | -3.394042000  | 24.915997000 | 15.516446000 |
| 1 | -4.003267000  | 25.302718000 | 14.863194000 |
| 1 | -3.866342000  | 25.042872000 | 16.385438000 |
| 1 | -6.574598000  | 14.339789000 | 18.888506000 |
| 6 | 6.809300000   | 21.199222000 | 16.694853000 |
| 8 | 9.513643000   | 25.083328000 | 19.477797000 |

|   |              |              |              |
|---|--------------|--------------|--------------|
| 6 | 15.595333000 | 23.131940000 | 19.773133000 |
| 1 | 15.938395000 | 22.880932000 | 18.761929000 |
| 1 | 14.907267000 | 23.980524000 | 19.706738000 |
| 1 | 16.472762000 | 23.418856000 | 20.358034000 |
| 1 | 9.590825000  | 26.901990000 | 23.808863000 |

# IM1<sup>4</sup>C<sub>6</sub>

|    |              |              |              |
|----|--------------|--------------|--------------|
| 6  | 6.685615000  | 27.489936000 | 20.398869000 |
| 6  | 11.313684000 | 28.416603000 | 19.155513000 |
| 6  | 12.802906000 | 24.773586000 | 21.975029000 |
| 6  | 8.155574000  | 23.805225000 | 23.171142000 |
| 6  | 7.820578000  | 28.079537000 | 19.822581000 |
| 6  | 7.796380000  | 29.209792000 | 18.910637000 |
| 6  | 9.088219000  | 29.468480000 | 18.562211000 |
| 6  | 9.917949000  | 28.499960000 | 19.257315000 |
| 6  | 12.165450000 | 27.500737000 | 19.787738000 |
| 6  | 13.615610000 | 27.471013000 | 19.695993000 |
| 6  | 14.041147000 | 26.450709000 | 20.499957000 |
| 6  | 12.848366000 | 25.850250000 | 21.077140000 |
| 6  | 11.663306000 | 24.188539000 | 22.545582000 |
| 6  | 11.684461000 | 23.089092000 | 23.488986000 |
| 6  | 10.387806000 | 22.815135000 | 23.817526000 |
| 6  | 9.554814000  | 23.745331000 | 23.083632000 |
| 6  | 7.299977000  | 24.712534000 | 22.530057000 |
| 6  | 5.851906000  | 24.783431000 | 22.653557000 |
| 6  | 5.442119000  | 25.822171000 | 21.867903000 |
| 6  | 6.636884000  | 26.389482000 | 21.263259000 |
| 7  | 9.115290000  | 27.688491000 | 20.006739000 |
| 7  | 11.752740000 | 26.506556000 | 20.618580000 |
| 7  | 10.358157000 | 24.549692000 | 22.311910000 |
| 7  | 7.724266000  | 25.686150000 | 21.681601000 |
| 26 | 9.731781000  | 26.112201000 | 21.136040000 |
| 1  | 5.732057000  | 27.944715000 | 20.142788000 |
| 1  | 11.788379000 | 29.156910000 | 18.515781000 |
| 1  | 13.756451000 | 24.349768000 | 22.280062000 |
| 1  | 7.689420000  | 23.080115000 | 23.833845000 |
| 6  | 8.759133000  | 22.253584000 | 17.040474000 |
| 6  | 10.102197000 | 22.748857000 | 17.072083000 |
| 6  | 8.272279000  | 23.109625000 | 19.300038000 |
| 6  | 7.879492000  | 22.471354000 | 18.179278000 |
| 6  | 8.039269000  | 21.543122000 | 16.078424000 |
| 6  | 10.535609000 | 23.391630000 | 18.193342000 |
| 6  | 9.657545000  | 23.697561000 | 19.402208000 |
| 7  | 6.645021000  | 21.895547000 | 17.845983000 |
| 1  | 5.816577000  | 21.742444000 | 18.454916000 |
| 6  | 8.524532000  | 21.032304000 | 14.749393000 |
| 6  | 8.445950000  | 19.493748000 | 14.578952000 |
| 7  | 7.098939000  | 18.988455000 | 14.392538000 |
| 6  | 6.544763000  | 18.947020000 | 13.146165000 |
| 6  | 5.117721000  | 18.419017000 | 13.096809000 |
| 8  | 7.153010000  | 19.290435000 | 12.131838000 |
| 1  | 6.521520000  | 18.748701000 | 15.204623000 |
| 8  | 11.779322000 | 23.878393000 | 18.369077000 |
| 6  | 12.624188000 | 24.026110000 | 17.230183000 |
| 1  | 5.915913000  | 20.769313000 | 16.244821000 |
| 1  | 10.745549000 | 22.597745000 | 16.212784000 |
| 1  | 7.610497000  | 23.299080000 | 20.138814000 |
| 1  | 10.153179000 | 23.244160000 | 20.285484000 |
| 1  | 7.963687000  | 21.482647000 | 13.921236000 |
| 1  | 9.569998000  | 21.337874000 | 14.614832000 |
| 1  | 8.889956000  | 18.998670000 | 15.450443000 |
| 1  | 9.022263000  | 19.220054000 | 13.690461000 |
| 1  | 4.519697000  | 19.080203000 | 12.462699000 |
| 1  | 4.661965000  | 18.345808000 | 14.087768000 |
| 1  | 5.118115000  | 17.429124000 | 12.625589000 |
| 1  | 13.481466000 | 24.605749000 | 17.574523000 |
| 1  | 12.101460000 | 24.572714000 | 16.437654000 |
| 1  | 12.956207000 | 23.052302000 | 16.849414000 |
| 16 | 9.895368000  | 27.627088000 | 22.928918000 |
| 6  | 14.948949000 | 21.632257000 | 20.238500000 |
| 8  | 15.598529000 | 20.706638000 | 20.719953000 |
| 7  | 13.585768000 | 21.638038000 | 20.209313000 |
| 6  | 12.806775000 | 20.576174000 | 20.843192000 |
| 6  | 12.687673000 | 19.263388000 | 20.050014000 |

|   |              |              |              |   |               |              |              |
|---|--------------|--------------|--------------|---|---------------|--------------|--------------|
| 6 | 11.920361000 | 19.326121000 | 18.710024000 | 1 | 0.900545000   | 19.833132000 | 23.127809000 |
| 6 | 12.799716000 | 19.820381000 | 17.549901000 | 1 | -0.031540000  | 18.713080000 | 22.160804000 |
| 6 | 11.322604000 | 17.952094000 | 18.366358000 | 7 | -1.969199000  | 23.88897000  | 20.698951000 |
| 1 | 13.099421000 | 22.468167000 | 19.892998000 | 6 | -1.647869000  | 24.378910000 | 19.364658000 |
| 1 | 11.812413000 | 20.986323000 | 21.048212000 | 6 | -2.702615000  | 25.389840000 | 18.891545000 |
| 1 | 12.173954000 | 18.556502000 | 20.717678000 | 6 | -4.147702000  | 24.834832000 | 18.886117000 |
| 1 | 13.694772000 | 18.858641000 | 19.889278000 | 8 | -4.838447000  | 25.043713000 | 17.836605000 |
| 1 | 11.084311000 | 20.032992000 | 18.825627000 | 8 | -4.555510000  | 24.241605000 | 19.915716000 |
| 1 | 12.220906000 | 19.886728000 | 16.620220000 | 1 | -2.976944000  | 23.882280000 | 20.886538000 |
| 1 | 13.633597000 | 19.127234000 | 17.375584000 | 1 | -1.593324000  | 23.543203000 | 18.653215000 |
| 1 | 13.226845000 | 20.804888000 | 17.760375000 | 1 | -2.437107000  | 25.738134000 | 17.889353000 |
| 1 | 10.775712000 | 17.982295000 | 17.415840000 | 1 | -2.687620000  | 26.260785000 | 19.562262000 |
| 1 | 10.626531000 | 17.612306000 | 19.142404000 | 6 | -2.987015000  | 20.473068000 | 18.533867000 |
| 1 | 12.112382000 | 17.194636000 | 18.271215000 | 6 | -3.990233000  | 19.498733000 | 19.106649000 |
| 6 | 4.967093000  | 20.709351000 | 23.963291000 | 8 | -5.078175000  | 19.243211000 | 18.518007000 |
| 6 | 3.664578000  | 20.651525000 | 23.163184000 | 6 | -1.778473000  | 19.762768000 | 17.859202000 |
| 8 | 2.585066000  | 20.456784000 | 23.741076000 | 6 | -0.835944000  | 20.841368000 | 17.285617000 |
| 6 | 5.049849000  | 19.599646000 | 25.023094000 | 6 | -2.246464000  | 18.757790000 | 16.795358000 |
| 6 | 5.099771000  | 18.158950000 | 24.476226000 | 6 | 0.459609000   | 20.304769000 | 16.664267000 |
| 6 | 6.339566000  | 17.894180000 | 23.608169000 | 1 | -3.498626000  | 21.096187000 | 17.793532000 |
| 6 | 5.028369000  | 17.153322000 | 25.635493000 | 1 | -1.233380000  | 19.212228000 | 18.641028000 |
| 1 | 4.980215000  | 21.682426000 | 24.473334000 | 1 | -1.391007000  | 21.424899000 | 16.539279000 |
| 1 | 4.171189000  | 19.698860000 | 25.670562000 | 1 | -0.574164000  | 21.534803000 | 18.096706000 |
| 1 | 5.935322000  | 19.776722000 | 25.651043000 | 1 | -1.395121000  | 18.271384000 | 16.307223000 |
| 1 | 4.206527000  | 18.010635000 | 23.852744000 | 1 | -2.836695000  | 19.263875000 | 16.022023000 |
| 1 | 6.356309000  | 16.855423000 | 23.257141000 | 1 | -2.860819000  | 17.965231000 | 17.235524000 |
| 1 | 6.368791000  | 18.536111000 | 22.721006000 | 1 | 1.105639000   | 21.132714000 | 16.349043000 |
| 1 | 7.262510000  | 18.067484000 | 24.178546000 | 1 | 1.032579000   | 19.694863000 | 17.375262000 |
| 1 | 5.015899000  | 16.120832000 | 25.265778000 | 1 | 0.269289000   | 19.689668000 | 15.777757000 |
| 1 | 4.125627000  | 17.305794000 | 26.238839000 | 7 | -3.654621000  | 18.896503000 | 20.255608000 |
| 1 | 5.896992000  | 17.257952000 | 26.300152000 | 6 | -4.423581000  | 17.823281000 | 20.885784000 |
| 7 | 3.783014000  | 20.849017000 | 21.836769000 | 6 | -4.516871000  | 16.626661000 | 19.894245000 |
| 6 | 2.682853000  | 20.851226000 | 20.877766000 | 8 | -3.504652000  | 16.164567000 | 19.377657000 |
| 6 | 3.162689000  | 21.530133000 | 19.581081000 | 6 | -5.751804000  | 18.295121000 | 21.540734000 |
| 8 | 4.447720000  | 20.997276000 | 19.219472000 | 8 | -6.783664000  | 18.544135000 | 20.569116000 |
| 6 | 3.272773000  | 23.044305000 | 19.710821000 | 6 | -5.559608000  | 19.509750000 | 22.446343000 |
| 1 | 4.701029000  | 20.878413000 | 21.409129000 | 1 | -2.859638000  | 19.260994000 | 20.795168000 |
| 1 | 1.825112000  | 21.389914000 | 21.288078000 | 1 | -3.784952000  | 17.469336000 | 21.702621000 |
| 1 | 2.437063000  | 21.288578000 | 18.793979000 | 1 | -6.124482000  | 17.456318000 | 22.143684000 |
| 1 | 4.322353000  | 20.059602000 | 18.871549000 | 1 | -6.343599000  | 18.986959000 | 19.807976000 |
| 1 | 3.601334000  | 23.482979000 | 18.761829000 | 1 | -6.522768000  | 19.783771000 | 22.886286000 |
| 1 | 3.995331000  | 23.325719000 | 20.485811000 | 1 | -5.180537000  | 20.366218000 | 21.881678000 |
| 1 | 2.296525000  | 23.460455000 | 19.978707000 | 1 | -4.840646000  | 19.297340000 | 23.245924000 |
| 6 | 4.447979000  | 15.619654000 | 18.424722000 | 7 | -5.769558000  | 16.140364000 | 19.670538000 |
| 2 | 2.953864000  | 15.300267000 | 18.519030000 | 6 | -6.067093000  | 15.234491000 | 18.574969000 |
| 8 | 2.520909000  | 14.158045000 | 18.378973000 | 6 | -7.113026000  | 15.806893000 | 17.602906000 |
| 6 | 4.841267000  | 16.518657000 | 17.233787000 | 8 | -7.902076000  | 15.068310000 | 17.026914000 |
| 6 | 4.717960000  | 18.043196000 | 17.437680000 | 1 | -6.526221000  | 16.740811000 | 19.989814000 |
| 8 | 4.079474000  | 18.462940000 | 18.456068000 | 1 | -5.129097000  | 15.033429000 | 18.046041000 |
| 8 | 5.269747000  | 18.772112000 | 16.575349000 | 7 | -7.096663000  | 17.169153000 | 17.461794000 |
| 1 | 4.778389000  | 16.098915000 | 19.354128000 | 6 | -7.989961000  | 17.848714000 | 16.541126000 |
| 1 | 5.887423000  | 16.329403000 | 16.965455000 | 6 | -9.156395000  | 18.623171000 | 17.165302000 |
| 1 | 4.259525000  | 16.250802000 | 16.341351000 | 8 | -9.921478000  | 19.262653000 | 16.438446000 |
| 7 | 2.156480000  | 16.383037000 | 18.770029000 | 1 | -6.307904000  | 17.696993000 | 17.828405000 |
| 6 | 0.701971000  | 16.317262000 | 18.669239000 | 1 | -7.428807000  | 18.573915000 | 15.944125000 |
| 6 | 0.020181000  | 16.273437000 | 20.048448000 | 1 | -8.410749000  | 17.111082000 | 15.854054000 |
| 8 | 0.530241000  | 17.352967000 | 20.854104000 | 7 | -9.306165000  | 18.566290000 | 18.514291000 |
| 6 | 0.192770000  | 14.937252000 | 20.769112000 | 6 | -10.273965000 | 19.420923000 | 19.197114000 |
| 1 | 2.627134000  | 17.291103000 | 18.725857000 | 6 | -9.637991000  | 20.772672000 | 19.573490000 |
| 1 | 0.433875000  | 15.430374000 | 18.087933000 | 8 | -9.394649000  | 21.066717000 | 20.741563000 |
| 1 | -1.045478000 | 16.484871000 | 19.917505000 | 1 | -8.553699000  | 18.177586000 | 19.071085000 |
| 1 | 1.497455000  | 17.242705000 | 20.857800000 | 1 | -11.124170000 | 19.553102000 | 18.522840000 |
| 1 | -0.265239000 | 14.987220000 | 21.763034000 | 7 | -9.316970000  | 21.547086000 | 18.505625000 |
| 1 | 1.252399000  | 14.681189000 | 20.880827000 | 6 | -8.307784000  | 22.588776000 | 18.597672000 |
| 1 | -0.283420000 | 14.129284000 | 20.203112000 | 6 | -8.406093000  | 23.464905000 | 17.338290000 |
| 6 | -1.625412000 | 22.865930000 | 22.872240000 | 8 | -9.249562000  | 23.245735000 | 16.462742000 |
| 6 | -1.076393000 | 23.278057000 | 21.501629000 | 6 | -6.901847000  | 21.977229000 | 18.705877000 |
| 8 | 0.112046000  | 23.099529000 | 21.198967000 | 8 | -6.614749000  | 21.352568000 | 17.450945000 |
| 6 | -0.841137000 | 21.709013000 | 23.490946000 | 1 | -9.549591000  | 21.233915000 | 17.567837000 |
| 6 | -1.022401000 | 20.413339000 | 22.704165000 | 1 | -8.495385000  | 23.189393000 | 19.493828000 |
| 8 | -2.085839000 | 20.193193000 | 22.097577000 | 1 | -6.156398000  | 22.739684000 | 18.967262000 |
| 7 | -0.005936000 | 19.539217000 | 22.758946000 | 1 | -6.921622000  | 21.240150000 | 19.518146000 |
| 1 | -1.562279000 | 23.740662000 | 23.533702000 | 1 | -5.894445000  | 20.708805000 | 17.602236000 |
| 1 | -1.203958000 | 21.528519000 | 24.512369000 | 7 | -7.488932000  | 24.458467000 | 17.257335000 |
| 1 | 0.221424000  | 21.955555000 | 23.561856000 | 6 | -7.365948000  | 25.248896000 | 16.054316000 |



|                                 |               |              |              |    |              |              |              |
|---------------------------------|---------------|--------------|--------------|----|--------------|--------------|--------------|
| 6                               | -6.542932000  | 24.631310000 | 14.919955000 | 6  | 7.095074000  | 27.000728000 | 17.681866000 |
| 8                               | -6.216399000  | 25.339297000 | 13.961745000 | 6  | 6.911105000  | 26.346335000 | 18.959436000 |
| 1                               | -6.648333000  | 24.502704000 | 17.852119000 | 6  | 7.850563000  | 25.125123000 | 20.892865000 |
| 1                               | -8.362090000  | 25.444040000 | 15.645523000 | 6  | 8.887300000  | 24.742332000 | 21.777075000 |
| 7                               | -6.253781000  | 23.306393000 | 15.003741000 | 6  | 8.320256000  | 24.293696000 | 22.951684000 |
| 6                               | -5.577416000  | 22.640447000 | 13.903368000 | 6  | 6.909218000  | 24.362278000 | 22.841398000 |
| 6                               | -6.570472000  | 21.947285000 | 12.944564000 | 6  | 4.589310000  | 24.351343000 | 23.735392000 |
| 8                               | -6.216465000  | 21.600722000 | 11.814107000 | 6  | 3.651326000  | 23.949098000 | 24.761906000 |
| 6                               | -4.478041000  | 21.656088000 | 14.415882000 | 6  | 2.438915000  | 24.459525000 | 24.404747000 |
| 8                               | -3.843057000  | 22.156380000 | 15.577203000 | 6  | 2.643231000  | 25.175493000 | 23.164906000 |
| 6                               | -3.463573000  | 21.339031000 | 13.313383000 | 6  | 1.841527000  | 26.568927000 | 21.294468000 |
| 1                               | -6.317288000  | 22.817602000 | 15.897801000 | 6  | 0.787597000  | 27.270191000 | 20.589616000 |
| 1                               | -5.100758000  | 23.420552000 | 13.302565000 | 6  | 1.363698000  | 27.812875000 | 19.484099000 |
| 1                               | -4.971175000  | 20.726108000 | 14.730740000 | 6  | 2.762064000  | 27.429613000 | 19.511926000 |
| 1                               | -3.631335000  | 23.119591000 | 15.457874000 | 7  | 5.635372000  | 26.533985000 | 19.405571000 |
| 1                               | -2.745335000  | 20.596522000 | 13.677229000 | 7  | 6.583239000  | 24.811526000 | 21.508441000 |
| 1                               | -2.908092000  | 22.247501000 | 13.048921000 | 7  | 3.955277000  | 25.086581000 | 22.780271000 |
| 1                               | -3.958125000  | 20.963169000 | 12.413753000 | 7  | 3.024226000  | 26.687048000 | 20.624639000 |
| 7                               | -7.820804000  | 21.739984000 | 13.434656000 | 26 | 4.759718000  | 25.843747000 | 21.076983000 |
| 6                               | -8.932607000  | 21.277449000 | 12.613761000 | 1  | 3.327401000  | 28.325863000 | 17.678316000 |
| 6                               | -9.552863000  | 19.943888000 | 13.057800000 | 1  | 8.946971000  | 25.742283000 | 19.214722000 |
| 6                               | -8.802433000  | 18.659985000 | 12.736639000 | 1  | 6.321395000  | 23.587510000 | 24.702350000 |
| 6                               | -9.364082000  | 17.445256000 | 13.167988000 | 1  | 0.636476000  | 25.842414000 | 22.870954000 |
| 6                               | -7.597334000  | 18.614882000 | 12.023790000 | 6  | 6.038129000  | 21.216878000 | 18.133833000 |
| 6                               | -8.750283000  | 16.224130000 | 12.893982000 | 6  | 5.478852000  | 22.300129000 | 17.417316000 |
| 6                               | -6.979280000  | 17.388973000 | 11.750139000 | 6  | 5.305799000  | 22.239527000 | 20.253420000 |
| 6                               | -7.549373000  | 16.191377000 | 12.178626000 | 6  | 5.940587000  | 21.205003000 | 19.546519000 |
| 1                               | -8.042686000  | 22.138327000 | 14.341418000 | 6  | 6.684305000  | 19.989325000 | 17.736826000 |
| 1                               | -8.570750000  | 21.230719000 | 11.583673000 | 6  | 4.851531000  | 23.328294000 | 18.103578000 |
| 1                               | -9.742717000  | 19.974868000 | 14.138714000 | 6  | 4.747678000  | 23.322118000 | 19.547690000 |
| 1                               | -10.546173000 | 19.882909000 | 12.586745000 | 7  | 6.524043000  | 20.041185000 | 19.999688000 |
| 1                               | -10.289834000 | 17.467387000 | 13.739631000 | 1  | 6.415201000  | 19.617854000 | 20.926671000 |
| 1                               | -7.119300000  | 19.532261000 | 11.692080000 | 6  | 6.881312000  | 19.492903000 | 16.327878000 |
| 1                               | -9.200659000  | 15.300504000 | 13.249669000 | 6  | 6.763466000  | 17.961207000 | 16.172368000 |
| 1                               | -6.039476000  | 17.379679000 | 11.202759000 | 7  | 5.506178000  | 17.411973000 | 16.658195000 |
| 1                               | -7.061620000  | 15.242397000 | 11.969015000 | 6  | 4.345287000  | 17.610238000 | 15.982022000 |
| 1                               | 12.582134000  | 22.601677000 | 23.850033000 | 6  | 3.086610000  | 17.086286000 | 16.656441000 |
| 1                               | 10.017792000  | 22.059997000 | 24.500717000 | 8  | 4.299493000  | 18.173775000 | 14.884347000 |
| 1                               | 14.219985000  | 28.154136000 | 19.110380000 | 1  | 5.497433000  | 16.983768000 | 17.582883000 |
| 1                               | 15.060299000  | 26.142336000 | 20.702540000 | 8  | 4.234281000  | 24.392172000 | 17.499078000 |
| 1                               | 6.899620000   | 29.723020000 | 18.585202000 | 6  | 4.144425000  | 24.386124000 | 16.088397000 |
| 1                               | 9.459589000   | 30.237287000 | 17.895183000 | 1  | 7.330844000  | 18.312108000 | 19.061037000 |
| 1                               | 5.237964000   | 24.128573000 | 23.260072000 | 1  | 5.517632000  | 22.302524000 | 16.333269000 |
| 1                               | 4.430701000   | 26.176569000 | 21.711029000 | 1  | 5.137609000  | 22.171423000 | 21.326047000 |
| 1                               | 5.837630000   | 20.696770000 | 23.296968000 | 1  | 6.218203000  | 23.984704000 | 20.988869000 |
| 1                               | 2.370394000   | 19.820381000 | 20.660776000 | 1  | 6.123066000  | 19.944939000 | 15.678802000 |
| 1                               | 4.951625000   | 14.652877000 | 18.340583000 | 1  | 7.857312000  | 19.793784000 | 15.912034000 |
| 1                               | 0.357341000   | 17.207618000 | 18.133295000 | 1  | 7.569083000  | 17.455938000 | 16.715754000 |
| 1                               | -2.682740000  | 22.598474000 | 22.786068000 | 1  | 6.866794000  | 17.709707000 | 15.111230000 |
| 1                               | -0.653557000  | 24.836604000 | 19.390660000 | 1  | 2.391931000  | 17.921038000 | 16.796056000 |
| 1                               | -9.719269000  | 22.042334000 | 12.652678000 | 1  | 3.272927000  | 16.617248000 | 17.625966000 |
| 1                               | -2.621999000  | 21.120321000 | 19.340551000 | 1  | 2.597915000  | 16.364239000 | 15.994020000 |
| 1                               | 13.274368000  | 20.350976000 | 21.808420000 | 1  | 3.583367000  | 25.283830000 | 15.820036000 |
| 1                               | -6.898204000  | 26.203345000 | 16.303899000 | 1  | 3.609559000  | 23.500314000 | 15.719402000 |
| 1                               | -10.600696000 | 18.936066000 | 20.118867000 | 1  | 5.137499000  | 24.427838000 | 15.616775000 |
| 8                               | -3.484265000  | 24.898086000 | 15.472638000 | 16 | 5.423097000  | 27.725018000 | 22.257486000 |
| 1                               | -4.102731000  | 25.265988000 | 14.817200000 | 6  | 9.878303000  | 22.863140000 | 18.466744000 |
| 1                               | -3.957983000  | 25.021958000 | 16.341274000 | 8  | 10.568837000 | 23.721760000 | 19.025747000 |
| 1                               | -6.464797000  | 14.278999000 | 18.931766000 | 7  | 9.677211000  | 21.624673000 | 18.991242000 |
| 6                               | 6.746441000   | 21.344787000 | 16.634593000 | 6  | 10.152811000 | 21.270605000 | 20.327442000 |
| 8                               | 9.517413000   | 25.073671000 | 19.520031000 | 6  | 11.656621000 | 20.955531000 | 20.425551000 |
| 6                               | 15.622161000  | 22.837824000 | 19.592330000 | 6  | 12.121233000 | 19.570866000 | 19.930954000 |
| 1                               | 15.872975000  | 22.599664000 | 18.551304000 | 6  | 11.939713000 | 19.372380000 | 18.417250000 |
| 1                               | 14.998192000  | 23.737097000 | 19.602487000 | 6  | 13.592558000 | 19.347254000 | 20.317342000 |
| 1                               | 16.557715000  | 23.037247000 | 20.120687000 | 1  | 8.965580000  | 21.033370000 | 18.572535000 |
| 1                               | 10.221135000  | 26.737669000 | 23.894985000 | 1  | 9.559103000  | 20.414351000 | 20.660945000 |
| IM2 <sup>2</sup> C <sub>6</sub> |               |              |              | 1  | 11.924782000 | 21.038543000 | 21.489069000 |
| 6                               | 3.683668000   | 27.726092000 | 18.511008000 | 1  | 12.209851000 | 21.749773000 | 19.908045000 |
| 6                               | 7.956126000   | 25.719565000 | 19.657896000 | 1  | 11.527375000 | 18.804594000 | 20.451646000 |
| 6                               | 5.962643000   | 24.056974000 | 23.790379000 | 1  | 12.322251000 | 18.391460000 | 18.107109000 |
| 6                               | 1.650062000   | 25.863901000 | 22.479346000 | 1  | 12.487503000 | 20.139371000 | 17.853201000 |
| 6                               | 5.002163000   | 27.296676000 | 18.458060000 | 1  | 10.890066000 | 19.433790000 | 18.115502000 |
| 6                               | 5.910057000   | 27.594312000 | 17.373408000 | 1  | 13.933713000 | 18.350229000 | 20.013083000 |
|                                 |               |              |              | 1  | 13.738290000 | 19.433430000 | 21.401016000 |
|                                 |               |              |              | 1  | 14.243625000 | 20.087493000 | 19.831734000 |

|   |              |              |              |   |              |              |              |
|---|--------------|--------------|--------------|---|--------------|--------------|--------------|
| 6 | 9.533510000  | 16.174256000 | 19.376325000 | 8 | -4.248684000 | 20.147082000 | 17.878251000 |
| 6 | 9.338614000  | 16.381336000 | 20.880024000 | 6 | -0.921498000 | 21.245383000 | 18.485158000 |
| 8 | 10.304915000 | 16.444197000 | 21.646896000 | 6 | -0.008197000 | 22.421860000 | 18.091818000 |
| 6 | 10.323982000 | 14.885284000 | 19.086864000 | 6 | -0.593325000 | 19.954368000 | 17.720848000 |
| 6 | 9.601320000  | 13.573413000 | 19.453544000 | 6 | 1.469730000  | 22.220149000 | 18.438362000 |
| 6 | 8.314303000  | 13.356837000 | 18.640294000 | 1 | -2.583879000 | 21.884144000 | 17.229961000 |
| 6 | 10.555815000 | 12.381272000 | 19.282493000 | 1 | -0.765027000 | 21.046689000 | 19.553988000 |
| 1 | 10.110384000 | 17.028659000 | 19.002109000 | 1 | -0.111993000 | 22.611807000 | 17.014710000 |
| 1 | 11.265691000 | 14.943599000 | 19.646447000 | 1 | -0.371735000 | 23.329489000 | 18.595220000 |
| 1 | 10.584817000 | 14.860684000 | 18.018271000 | 1 | 0.447386000  | 19.657468000 | 17.887307000 |
| 1 | 9.327187000  | 13.629352000 | 20.517379000 | 1 | -0.725960000 | 20.093674000 | 16.641068000 |
| 1 | 7.851154000  | 12.396017000 | 18.899673000 | 1 | -1.222954000 | 19.119883000 | 18.050375000 |
| 1 | 7.567777000  | 14.139291000 | 18.813788000 | 1 | 2.036847000  | 23.139042000 | 18.266456000 |
| 1 | 8.535292000  | 13.334125000 | 17.563867000 | 1 | 1.600795000  | 21.953885000 | 19.495224000 |
| 1 | 10.074895000 | 11.440480000 | 19.578504000 | 1 | 1.928184000  | 21.428182000 | 17.836885000 |
| 1 | 11.461168000 | 12.503593000 | 19.889800000 | 7 | -3.362958000 | 20.188079000 | 19.971264000 |
| 1 | 10.868585000 | 12.277071000 | 18.234255000 | 6 | -4.156704000 | 19.079662000 | 20.517260000 |
| 7 | 8.045174000  | 16.464557000 | 21.282302000 | 6 | -3.737371000 | 17.764416000 | 19.798604000 |
| 6 | 7.646263000  | 16.507663000 | 22.679399000 | 8 | -2.566045000 | 17.400194000 | 19.836828000 |
| 6 | 7.139699000  | 17.884284000 | 23.155975000 | 6 | -5.675942000 | 19.375522000 | 20.634157000 |
| 8 | 6.126517000  | 18.408121000 | 22.306597000 | 8 | -6.375957000 | 19.236523000 | 19.390730000 |
| 6 | 8.254587000  | 18.920424000 | 23.256732000 | 6 | -5.964373000 | 20.737074000 | 21.269089000 |
| 1 | 7.297967000  | 16.391891000 | 20.583944000 | 1 | -2.619849000 | 20.526157000 | 20.590986000 |
| 1 | 8.506923000  | 16.205985000 | 23.283786000 | 1 | -3.781380000 | 18.965449000 | 21.538866000 |
| 1 | 6.721408000  | 17.724150000 | 24.167036000 | 1 | -6.089962000 | 18.587059000 | 21.276305000 |
| 1 | 5.572253000  | 17.669099000 | 21.933007000 | 1 | -5.825481000 | 19.696834000 | 18.719773000 |
| 1 | 7.837201000  | 19.896044000 | 23.529692000 | 1 | -7.042095000 | 20.832855000 | 21.434026000 |
| 1 | 8.774510000  | 19.019443000 | 22.299115000 | 1 | -5.649030000 | 21.562634000 | 20.622126000 |
| 1 | 8.991468000  | 18.627068000 | 24.012608000 | 1 | -5.453649000 | 20.838679000 | 22.234763000 |
| 6 | 3.042466000  | 14.045222000 | 20.895385000 | 7 | -4.721489000 | 17.080114000 | 19.151437000 |
| 6 | 1.706072000  | 14.789772000 | 20.836453000 | 6 | -4.431697000 | 15.936000000 | 18.312154000 |
| 8 | 0.658391000  | 14.217769000 | 20.543349000 | 6 | -4.569505000 | 16.172631000 | 16.799685000 |
| 6 | 4.080764000  | 14.505865000 | 19.853655000 | 8 | -4.629583000 | 15.219307000 | 16.031961000 |
| 6 | 4.912389000  | 15.752752000 | 20.219156000 | 1 | -5.622703000 | 17.554005000 | 19.076884000 |
| 8 | 4.636754000  | 16.350616000 | 21.305203000 | 1 | -3.399309000 | 15.634322000 | 18.514107000 |
| 8 | 5.843096000  | 16.063084000 | 19.421476000 | 7 | -4.625400000 | 17.479106000 | 16.392937000 |
| 1 | 3.478492000  | 14.153640000 | 21.895489000 | 6 | -4.568361000 | 17.838671000 | 14.986625000 |
| 1 | 4.806840000  | 13.701341000 | 19.681341000 | 6 | -5.831744000 | 18.509426000 | 14.432468000 |
| 1 | 3.605367000  | 14.675674000 | 18.879214000 | 8 | -5.770263000 | 19.298519000 | 13.489646000 |
| 7 | 1.778094000  | 16.124949000 | 21.128635000 | 1 | -4.448680000 | 18.222063000 | 17.065359000 |
| 6 | 0.651423000  | 17.026109000 | 20.901991000 | 1 | -3.737707000 | 18.523710000 | 14.798996000 |
| 6 | -0.090828000 | 17.402688000 | 22.191721000 | 1 | -4.393662000 | 16.916900000 | 14.421510000 |
| 8 | 0.815883000  | 18.044073000 | 23.118345000 | 7 | -7.002106000 | 18.121811000 | 15.005132000 |
| 6 | -0.786462000 | 16.220978000 | 22.862107000 | 6 | -8.286192000 | 18.689890000 | 14.611393000 |
| 1 | 2.720623000  | 16.497990000 | 21.252678000 | 6 | -8.625603000 | 19.953131000 | 15.424406000 |
| 1 | -0.048140000 | 16.549162000 | 20.211807000 | 8 | -9.491412000 | 19.941745000 | 16.297034000 |
| 1 | -0.823859000 | 18.173621000 | 21.944323000 | 1 | -6.947016000 | 17.595401000 | 15.866665000 |
| 1 | 1.595955000  | 17.467266000 | 23.186131000 | 1 | -8.229049000 | 18.915438000 | 13.542788000 |
| 1 | -1.280440000 | 16.551749000 | 23.782664000 | 7 | -7.853482000 | 21.021809000 | 15.111290000 |
| 1 | -0.069481000 | 15.431582000 | 23.114118000 | 6 | -7.793152000 | 22.212357000 | 15.936968000 |
| 1 | -1.533018000 | 15.791307000 | 22.186936000 | 6 | -7.751448000 | 23.461619000 | 15.036679000 |
| 6 | -2.146577000 | 23.394801000 | 22.398268000 | 8 | -7.923351000 | 23.390706000 | 13.823586000 |
| 6 | -2.312058000 | 24.823311000 | 21.881426000 | 6 | -6.603875000 | 22.126438000 | 16.900942000 |
| 8 | -1.617244000 | 25.749094000 | 22.328066000 | 8 | -5.391271000 | 22.031814000 | 16.138818000 |
| 6 | -0.715143000 | 22.881942000 | 22.175514000 | 1 | -7.145575000 | 20.920577000 | 14.391680000 |
| 6 | -0.589344000 | 21.381827000 | 22.411803000 | 1 | -8.713012000 | 22.235744000 | 16.531868000 |
| 8 | -1.479150000 | 20.593014000 | 22.050455000 | 1 | -6.550721000 | 22.972279000 | 17.593363000 |
| 7 | 0.541820000  | 20.955132000 | 23.005258000 | 1 | -6.741116000 | 21.222747000 | 17.504589000 |
| 1 | -2.370622000 | 23.395416000 | 23.472540000 | 1 | -4.815256000 | 21.409179000 | 16.627808000 |
| 1 | -0.007221000 | 23.440579000 | 22.792656000 | 7 | -7.527214000 | 24.633653000 | 15.698016000 |
| 1 | -0.417368000 | 23.062267000 | 21.133391000 | 6 | -7.345837000 | 25.866743000 | 14.965403000 |
| 1 | 1.279903000  | 21.607825000 | 23.230321000 | 6 | -5.889626000 | 26.275785000 | 14.693534000 |
| 1 | 0.727176000  | 19.948337000 | 23.075913000 | 8 | -5.653805000 | 27.376907000 | 14.188809000 |
| 7 | -3.243645000 | 24.970227000 | 20.922705000 | 1 | -7.253206000 | 24.668095000 | 16.687984000 |
| 6 | -3.606389000 | 26.241762000 | 20.304778000 | 1 | -7.833890000 | 25.766144000 | 13.992436000 |
| 6 | -5.114982000 | 26.278272000 | 20.015174000 | 7 | -4.946383000 | 25.373682000 | 15.050668000 |
| 6 | -5.593921000 | 25.154543000 | 19.063893000 | 6 | -3.521808000 | 25.520743000 | 14.773234000 |
| 8 | -6.345996000 | 25.507303000 | 18.098336000 | 6 | -3.035675000 | 24.446391000 | 13.777566000 |
| 8 | -5.231455000 | 23.974612000 | 19.319782000 | 8 | -2.334206000 | 24.767699000 | 12.817893000 |
| 1 | -3.817223000 | 24.193932000 | 20.584310000 | 6 | -2.687812000 | 25.565095000 | 16.089289000 |
| 1 | -3.050035000 | 26.387505000 | 19.368835000 | 8 | -2.841732000 | 26.796244000 | 16.764762000 |
| 1 | -5.371777000 | 27.254620000 | 19.598016000 | 6 | -1.190315000 | 25.411696000 | 15.826951000 |
| 1 | -5.663049000 | 26.162597000 | 20.961346000 | 1 | -5.258987000 | 24.567639000 | 15.579429000 |
| 6 | -2.399996000 | 21.657627000 | 18.284758000 | 1 | -3.396688000 | 26.476741000 | 14.262784000 |
| 6 | -3.404650000 | 20.603192000 | 18.698753000 | 1 | -3.030894000 | 24.726179000 | 16.722636000 |

|   |              |              |              |    |              |              |              |
|---|--------------|--------------|--------------|----|--------------|--------------|--------------|
| 1 | -3.787021000 | 27.057048000 | 16.881985000 | 7  | 5.518038000  | 26.657156000 | 19.407908000 |
| 1 | -0.651856000 | 25.548223000 | 16.769789000 | 7  | 6.714674000  | 24.855193000 | 21.521395000 |
| 1 | -0.849658000 | 26.175751000 | 15.120047000 | 7  | 3.971903000  | 25.174739000 | 22.767946000 |
| 1 | -0.942983000 | 24.427023000 | 15.420189000 | 7  | 2.825579000  | 26.738711000 | 20.559179000 |
| 7 | -3.388385000 | 23.156506000 | 14.049015000 | 26 | 4.684130000  | 25.920277000 | 21.051142000 |
| 6 | -3.183481000 | 22.062536000 | 13.098541000 | 1  | 3.121681000  | 28.220124000 | 17.552236000 |
| 6 | -2.243480000 | 20.943115000 | 13.582062000 | 1  | 8.886981000  | 26.094455000 | 19.227272000 |
| 6 | -0.736909000 | 21.167198000 | 13.541398000 | 1  | 6.377073000  | 23.759322000 | 24.722780000 |
| 6 | 0.106643000  | 20.093978000 | 13.882546000 | 1  | 0.617194000  | 25.823752000 | 22.928017000 |
| 6 | -0.144877000 | 22.379443000 | 13.164877000 | 6  | 6.084021000  | 21.194205000 | 18.134594000 |
| 6 | 1.496029000  | 20.218547000 | 13.861853000 | 6  | 5.522104000  | 22.269502000 | 17.407886000 |
| 6 | 1.249293000  | 22.508488000 | 13.140447000 | 6  | 5.370695000  | 22.240652000 | 20.249045000 |
| 6 | 2.071446000  | 21.437381000 | 13.487564000 | 6  | 5.995448000  | 21.198929000 | 19.551094000 |
| 1 | -4.073447000 | 22.972678000 | 14.778033000 | 6  | 6.732936000  | 19.965349000 | 17.749601000 |
| 1 | -2.824700000 | 22.504770000 | 12.166426000 | 6  | 4.905363000  | 23.308284000 | 18.087005000 |
| 1 | -2.538971000 | 20.672060000 | 14.607077000 | 6  | 4.820288000  | 23.317999000 | 19.531757000 |
| 1 | -2.476174000 | 20.056478000 | 12.974665000 | 7  | 6.585270000  | 20.040848000 | 20.013159000 |
| 1 | -0.337711000 | 19.140621000 | 14.166030000 | 1  | 6.491177000  | 19.627433000 | 20.947355000 |
| 1 | -0.761130000 | 23.229786000 | 12.887289000 | 6  | 6.934106000  | 19.454359000 | 16.346553000 |
| 1 | 2.136516000  | 19.381904000 | 14.132766000 | 6  | 6.813299000  | 17.921173000 | 16.209079000 |
| 1 | 1.686550000  | 23.459835000 | 12.845019000 | 7  | 5.552631000  | 17.382543000 | 16.697410000 |
| 1 | 3.153756000  | 21.538852000 | 13.465824000 | 6  | 4.395279000  | 17.580499000 | 16.015598000 |
| 1 | 3.906367000  | 23.360577000 | 25.634610000 | 6  | 3.130615000  | 17.071600000 | 16.690190000 |
| 1 | 1.494156000  | 24.392319000 | 24.929831000 | 8  | 4.357155000  | 18.132647000 | 14.911616000 |
| 1 | 9.938701000  | 24.825553000 | 21.536692000 | 1  | 5.540521000  | 16.968534000 | 17.628987000 |
| 1 | 8.842510000  | 23.977478000 | 23.846232000 | 8  | 4.294007000  | 24.371779000 | 17.481111000 |
| 1 | 5.655328000  | 28.181230000 | 16.499784000 | 6  | 4.187537000  | 24.355408000 | 16.070748000 |
| 1 | 8.019955000  | 26.999523000 | 17.118991000 | 1  | 7.397670000  | 18.307942000 | 19.090394000 |
| 1 | -0.243636000 | 27.287675000 | 20.917482000 | 1  | 5.554252000  | 22.259715000 | 16.323842000 |
| 1 | 0.896803000  | 28.393196000 | 18.698357000 | 1  | 5.234484000  | 22.202439000 | 21.327161000 |
| 1 | 8.573304000  | 16.170014000 | 18.850578000 | 1  | 6.254722000  | 24.111230000 | 20.980822000 |
| 1 | 6.842691000  | 15.775643000 | 22.819736000 | 1  | 6.179585000  | 19.900529000 | 15.689181000 |
| 1 | 2.799355000  | 12.990923000 | 20.737498000 | 1  | 7.913409000  | 19.748463000 | 15.934783000 |
| 1 | 1.032129000  | 17.942222000 | 20.436035000 | 1  | 7.615419000  | 17.420357000 | 16.761618000 |
| 1 | -2.855991000 | 22.714458000 | 21.919018000 | 1  | 6.919863000  | 17.656927000 | 15.151425000 |
| 1 | -3.320079000 | 27.044195000 | 20.990822000 | 1  | 2.437096000  | 17.910318000 | 16.810242000 |
| 1 | -4.159636000 | 21.603025000 | 12.906415000 | 1  | 3.308795000  | 16.618872000 | 17.668915000 |
| 1 | -2.621391000 | 22.575828000 | 18.845088000 | 1  | 2.644641000  | 16.339206000 | 16.037146000 |
| 1 | 9.927379000  | 22.106311000 | 20.999211000 | 1  | 3.632242000  | 25.256468000 | 15.802600000 |
| 1 | -7.817908000 | 26.696013000 | 15.501638000 | 1  | 3.639763000  | 23.472086000 | 15.716029000 |
| 1 | -9.073930000 | 17.955531000 | 14.790821000 | 1  | 5.175641000  | 24.384173000 | 15.588238000 |
| 8 | -5.364224000 | 27.911135000 | 17.185528000 | 16 | 5.428761000  | 27.788064000 | 22.349027000 |
| 1 | -5.583089000 | 28.056901000 | 16.248537000 | 6  | 9.808853000  | 23.258636000 | 18.302898000 |
| 1 | -5.868038000 | 27.106222000 | 17.469456000 | 8  | 10.602946000 | 24.061360000 | 18.801116000 |
| 1 | -5.080699000 | 15.089156000 | 18.558654000 | 7  | 9.526915000  | 22.054524000 | 18.868144000 |
| 6 | 6.945575000  | 19.308443000 | 18.909243000 | 6  | 10.098123000 | 21.652319000 | 20.150116000 |
| 8 | 4.082284000  | 24.280702000 | 20.177007000 | 6  | 11.536266000 | 21.107752000 | 20.067071000 |
| 6 | 9.182071000  | 23.133059000 | 17.141528000 | 6  | 11.708898000 | 19.655603000 | 19.578025000 |
| 1 | 9.793640000  | 23.826592000 | 16.558836000 | 6  | 11.206713000 | 19.422125000 | 18.144137000 |
| 1 | 9.005836000  | 22.221602000 | 16.562446000 | 6  | 13.182705000 | 19.235406000 | 19.701085000 |
| 1 | 8.209065000  | 23.600684000 | 17.330822000 | 1  | 8.779836000  | 21.491936000 | 18.477134000 |
| 1 | 6.680695000  | 27.830349000 | 21.766832000 | 1  | 9.424694000  | 20.907110000 | 20.585579000 |

# IM2<sup>4</sup><sub>C6</sub>

|   |             |              |              |   |              |              |              |
|---|-------------|--------------|--------------|---|--------------|--------------|--------------|
| 6 | 3.471715000 | 27.685011000 | 18.431109000 | 1 | 11.433264000 | 18.398413000 | 17.819040000 |
| 6 | 7.909553000 | 25.964292000 | 19.682920000 | 1 | 11.690885000 | 20.111497000 | 17.440028000 |
| 6 | 6.029754000 | 24.183124000 | 23.783992000 | 1 | 10.125154000 | 19.562979000 | 18.059348000 |
| 6 | 1.604926000 | 25.892584000 | 22.479046000 | 1 | 13.319997000 | 18.185151000 | 19.416594000 |
| 6 | 4.831095000 | 27.347144000 | 18.436701000 | 1 | 13.548858000 | 19.354657000 | 20.728158000 |
| 6 | 5.741693000 | 27.680388000 | 17.365551000 | 1 | 13.819236000 | 19.846129000 | 19.046180000 |
| 6 | 6.965134000 | 27.183312000 | 17.706722000 | 6 | 9.599198000  | 15.742394000 | 19.592174000 |
| 6 | 6.820080000 | 26.533994000 | 18.991520000 | 6 | 9.348620000  | 15.931040000 | 21.090763000 |
| 6 | 7.895570000 | 25.324673000 | 20.914877000 | 8 | 10.241826000 | 15.730983000 | 21.917301000 |
| 6 | 8.952757000 | 25.139036000 | 21.849104000 | 6 | 10.201048000 | 14.360264000 | 19.287942000 |
| 6 | 8.415682000 | 24.639586000 | 23.021252000 | 6 | 9.258580000  | 13.164555000 | 19.533767000 |
| 6 | 7.009911000 | 24.489093000 | 22.849481000 | 6 | 8.025411000  | 13.183215000 | 18.616102000 |
| 6 | 4.646365000 | 24.460460000 | 23.722620000 | 6 | 10.030625000 | 11.844984000 | 19.378029000 |
| 6 | 3.719343000 | 24.071785000 | 24.763253000 | 1 | 10.320718000 | 16.513325000 | 19.291394000 |
| 6 | 2.493108000 | 24.559768000 | 24.411994000 | 1 | 11.093803000 | 14.246242000 | 19.914702000 |
| 6 | 2.656811000 | 25.259976000 | 23.156908000 | 1 | 10.536574000 | 14.338694000 | 18.240263000 |
| 6 | 1.676949000 | 26.566544000 | 21.255628000 | 1 | 8.910342000  | 13.224289000 | 20.575516000 |
| 6 | 0.561559000 | 27.151339000 | 20.520643000 | 1 | 7.402100000  | 12.296364000 | 18.789073000 |
| 6 | 1.086110000 | 27.661111000 | 19.370828000 | 1 | 7.395773000  | 14.064759000 | 18.776593000 |
| 6 | 2.518177000 | 27.383290000 | 19.409175000 | 1 | 8.327412000  | 13.170181000 | 17.559363000 |

|   |              |              |              |   |              |              |              |
|---|--------------|--------------|--------------|---|--------------|--------------|--------------|
| 1 | 9.387439000  | 10.980524000 | 19.585497000 | 1 | 1.996654000  | 21.441451000 | 18.008990000 |
| 1 | 10.887810000 | 11.799933000 | 20.061194000 | 7 | -3.334034000 | 20.151152000 | 19.985690000 |
| 1 | 10.413828000 | 11.733550000 | 18.354125000 | 6 | -4.131613000 | 19.030278000 | 20.500158000 |
| 7 | 8.089974000  | 16.330308000 | 21.414890000 | 6 | -3.688276000 | 17.727206000 | 19.773685000 |
| 6 | 7.640838000  | 16.463846000 | 22.790466000 | 8 | -2.515380000 | 17.370567000 | 19.831640000 |
| 6 | 7.238621000  | 17.898359000 | 23.180638000 | 6 | -5.654996000 | 19.314396000 | 20.589255000 |
| 8 | 6.237359000  | 18.430858000 | 22.320054000 | 8 | -6.328501000 | 19.186352000 | 19.330178000 |
| 6 | 8.419328000  | 18.864776000 | 23.183012000 | 6 | -5.966831000 | 20.665649000 | 21.234979000 |
| 1 | 7.376881000  | 16.380581000 | 20.681802000 | 1 | -2.605551000 | 20.484843000 | 20.624777000 |
| 1 | 8.455746000  | 16.121426000 | 23.434340000 | 1 | -3.777043000 | 18.904817000 | 21.527844000 |
| 1 | 6.836976000  | 17.835449000 | 24.208746000 | 1 | -6.076339000 | 18.514945000 | 21.212774000 |
| 1 | 5.653050000  | 17.703663000 | 21.967927000 | 1 | -5.768852000 | 19.660527000 | 18.676891000 |
| 1 | 8.077498000  | 19.876801000 | 23.426999000 | 1 | -7.047994000 | 20.749193000 | 21.383335000 |
| 1 | 8.893652000  | 18.888323000 | 22.196257000 | 1 | -5.649588000 | 21.501657000 | 20.602528000 |
| 1 | 9.171890000  | 18.560889000 | 23.919292000 | 1 | -5.473072000 | 20.760967000 | 22.210100000 |
| 6 | 3.123098000  | 14.077416000 | 20.958537000 | 7 | -4.654001000 | 17.044751000 | 19.097568000 |
| 6 | 1.775361000  | 14.800074000 | 20.894325000 | 6 | -4.339465000 | 15.911436000 | 18.252712000 |
| 8 | 0.737319000  | 14.211266000 | 20.600437000 | 6 | -4.435275000 | 16.164644000 | 16.739682000 |
| 6 | 4.154036000  | 14.548856000 | 19.914296000 | 8 | -4.467044000 | 15.219561000 | 15.960189000 |
| 6 | 4.968185000  | 15.809289000 | 20.272996000 | 1 | -5.556832000 | 17.513452000 | 19.010177000 |
| 8 | 4.680428000  | 16.412335000 | 21.353465000 | 1 | -3.312491000 | 15.608649000 | 18.478921000 |
| 8 | 5.898467000  | 16.126104000 | 19.477620000 | 7 | -4.486342000 | 17.475167000 | 16.345554000 |
| 1 | 3.556912000  | 14.198355000 | 21.958133000 | 6 | -4.383912000 | 17.850347000 | 14.945784000 |
| 1 | 4.891190000  | 13.753831000 | 19.746115000 | 6 | -5.632007000 | 18.518340000 | 14.354803000 |
| 1 | 3.675487000  | 14.706241000 | 18.939280000 | 8 | -5.543421000 | 19.317915000 | 13.423072000 |
| 7 | 1.825775000  | 16.137239000 | 21.182854000 | 1 | -4.335413000 | 18.211577000 | 17.031241000 |
| 6 | 0.686098000  | 17.019850000 | 20.948061000 | 1 | -3.552292000 | 18.543113000 | 14.794762000 |
| 6 | -0.073718000 | 17.377921000 | 22.232924000 | 1 | -4.182757000 | 16.936087000 | 14.377286000 |
| 8 | 0.819911000  | 18.015287000 | 23.175035000 | 7 | -6.818736000 | 18.116603000 | 14.882300000 |
| 6 | -0.768139000 | 16.184938000 | 22.884353000 | 6 | -8.091987000 | 18.681875000 | 14.451282000 |
| 1 | 2.762650000  | 16.525776000 | 21.303776000 | 6 | -8.467899000 | 19.929251000 | 15.272472000 |
| 1 | 0.001112000  | 16.535028000 | 20.248723000 | 8 | -9.353934000 | 19.894301000 | 16.123965000 |
| 1 | -0.809526000 | 18.146270000 | 21.986121000 | 1 | -6.789918000 | 17.581303000 | 15.739641000 |
| 1 | 1.602792000  | 17.441912000 | 23.241795000 | 1 | -7.997888000 | 18.924535000 | 13.389104000 |
| 1 | -1.272881000 | 16.503414000 | 23.803446000 | 7 | -7.702777000 | 21.012470000 | 14.993622000 |
| 1 | -0.049422000 | 15.396763000 | 23.134864000 | 6 | -7.677079000 | 22.189412000 | 15.840600000 |
| 1 | -1.505862000 | 15.758064000 | 22.197756000 | 6 | -7.609885000 | 23.453752000 | 14.963307000 |
| 6 | -2.206470000 | 23.323037000 | 22.479472000 | 8 | -7.733524000 | 23.402104000 | 13.743386000 |
| 6 | -2.387941000 | 24.756673000 | 21.983708000 | 6 | -6.521311000 | 22.092943000 | 16.843442000 |
| 8 | -1.705478000 | 25.683595000 | 22.445369000 | 8 | -5.283733000 | 22.018918000 | 16.120803000 |
| 6 | -0.761926000 | 22.840980000 | 22.274775000 | 1 | -6.973086000 | 20.929899000 | 14.293818000 |
| 6 | -0.614063000 | 21.339638000 | 22.488682000 | 1 | -8.616967000 | 22.199027000 | 16.403662000 |
| 8 | -1.486748000 | 20.542658000 | 22.104625000 | 1 | -6.497266000 | 22.926908000 | 17.551672000 |
| 7 | 0.517525000  | 20.921076000 | 23.087283000 | 1 | -6.673689000 | 21.177947000 | 17.426349000 |
| 1 | -2.450033000 | 23.300457000 | 23.549287000 | 1 | -4.716967000 | 21.397605000 | 16.622205000 |
| 1 | -0.076174000 | 23.403376000 | 22.913828000 | 7 | -7.423156000 | 24.615951000 | 15.652994000 |
| 1 | -0.448742000 | 23.043970000 | 21.241361000 | 6 | -7.228134000 | 25.864175000 | 14.950088000 |
| 1 | 1.242089000  | 21.581480000 | 23.331801000 | 6 | -5.768079000 | 26.292316000 | 14.733770000 |
| 1 | 0.715346000  | 19.915955000 | 23.149637000 | 8 | -5.528069000 | 27.401106000 | 14.248314000 |
| 7 | -3.319572000 | 24.908151000 | 21.025187000 | 1 | -7.183825000 | 24.634311000 | 16.652195000 |
| 6 | -3.684064000 | 26.185597000 | 20.420917000 | 1 | -7.681951000 | 25.777957000 | 13.959343000 |
| 6 | -5.181799000 | 26.202302000 | 20.080422000 | 7 | -4.826353000 | 25.398063000 | 15.114515000 |
| 6 | -5.605886000 | 25.091807000 | 19.088977000 | 6 | -3.396512000 | 25.559307000 | 14.874207000 |
| 8 | -6.319882000 | 25.454893000 | 18.098704000 | 6 | -2.879713000 | 24.501548000 | 13.875406000 |
| 8 | -5.239524000 | 23.911706000 | 19.337621000 | 8 | -2.150592000 | 24.839354000 | 12.942377000 |
| 1 | -3.872379000 | 24.129141000 | 20.659963000 | 6 | -2.593132000 | 25.593496000 | 16.209660000 |
| 1 | -3.098751000 | 26.361200000 | 19.507788000 | 8 | -2.772344000 | 26.814581000 | 16.897661000 |
| 1 | -5.441459000 | 27.183035000 | 19.675487000 | 6 | -1.088867000 | 25.455472000 | 15.979464000 |
| 1 | -5.759787000 | 26.056111000 | 21.004253000 | 1 | -5.146107000 | 24.585459000 | 15.628595000 |
| 6 | -2.345727000 | 21.647724000 | 18.337666000 | 1 | -3.266790000 | 26.522805000 | 14.379126000 |
| 6 | -3.351429000 | 20.581412000 | 18.717540000 | 1 | -2.943523000 | 24.743790000 | 16.824253000 |
| 8 | -4.174662000 | 20.129753000 | 17.874109000 | 1 | -3.722881000 | 27.063533000 | 16.998850000 |
| 6 | -0.869028000 | 21.239506000 | 18.558853000 | 1 | -0.572487000 | 25.588451000 | 16.935237000 |
| 6 | 0.047130000  | 22.425102000 | 18.201063000 | 1 | -0.739640000 | 26.228103000 | 15.286167000 |
| 6 | -0.520116000 | 19.962049000 | 17.780789000 | 1 | -0.824161000 | 24.476610000 | 15.569662000 |
| 6 | 1.514410000  | 22.231271000 | 18.594479000 | 7 | -3.241424000 | 23.207797000 | 14.113608000 |
| 1 | -2.512029000 | 21.889432000 | 17.283329000 | 6 | -3.020357000 | 22.131158000 | 13.146925000 |
| 1 | -0.731910000 | 21.024899000 | 19.627267000 | 6 | -2.095783000 | 20.998822000 | 13.629629000 |
| 1 | -0.023311000 | 22.620219000 | 17.122170000 | 6 | -0.587286000 | 21.210429000 | 13.605059000 |
| 1 | -0.337745000 | 23.327756000 | 18.697295000 | 6 | 0.244043000  | 20.122665000 | 13.929733000 |
| 1 | 0.519765000  | 19.669071000 | 17.959059000 | 6 | 0.018146000  | 22.424730000 | 13.257503000 |
| 1 | -0.636608000 | 20.116453000 | 16.701113000 | 6 | 1.634575000  | 20.233726000 | 13.918833000 |
| 1 | -1.149400000 | 19.118788000 | 18.087953000 | 6 | 1.413625000  | 22.540284000 | 13.242100000 |
| 1 | 2.082111000  | 23.152830000 | 18.439436000 | 6 | 2.223485000  | 21.454065000 | 13.571228000 |
| 1 | 1.611295000  | 21.964892000 | 19.655129000 | 1 | -3.945488000 | 23.011731000 | 14.820914000 |

|   |              |              |              |    |              |              |              |
|---|--------------|--------------|--------------|----|--------------|--------------|--------------|
| 1 | -2.640490000 | 22.588615000 | 12.230706000 | 6  | 4.940895000  | 23.210276000 | 18.197144000 |
| 1 | -2.404170000 | 20.721880000 | 14.649224000 | 6  | 4.890285000  | 23.140146000 | 19.618480000 |
| 1 | -2.330227000 | 20.119584000 | 13.012585000 | 7  | 6.825587000  | 19.991597000 | 20.007743000 |
| 1 | -0.211065000 | 19.168008000 | 14.190921000 | 1  | 6.750170000  | 19.552942000 | 20.933785000 |
| 1 | -0.588439000 | 23.286731000 | 12.994642000 | 6  | 7.079359000  | 19.474324000 | 16.322571000 |
| 1 | 2.265013000  | 19.385013000 | 14.175501000 | 6  | 6.904713000  | 17.947460000 | 16.164596000 |
| 1 | 1.861704000  | 23.492672000 | 12.966717000 | 7  | 5.636261000  | 17.443422000 | 16.668761000 |
| 1 | 3.306912000  | 21.544728000 | 13.554395000 | 6  | 4.477915000  | 17.665500000 | 15.996003000 |
| 1 | 3.985807000  | 23.499677000 | 25.643589000 | 6  | 3.210577000  | 17.179624000 | 16.682325000 |
| 1 | 1.559267000  | 24.482463000 | 24.955375000 | 8  | 4.441492000  | 18.217794000 | 14.892014000 |
| 1 | 9.979669000  | 25.428242000 | 21.669588000 | 1  | 5.616327000  | 17.040094000 | 17.605294000 |
| 1 | 8.939820000  | 24.476089000 | 23.954580000 | 8  | 4.276260000  | 24.272222000 | 17.646636000 |
| 1 | 5.466350000  | 28.226055000 | 16.471463000 | 6  | 4.197285000  | 24.341060000 | 16.234622000 |
| 1 | 7.891961000  | 27.238504000 | 17.149442000 | 1  | 7.698723000  | 18.320913000 | 19.027123000 |
| 1 | -0.466856000 | 27.129506000 | 20.856938000 | 1  | 5.619165000  | 22.252350000 | 16.392883000 |
| 1 | 0.558553000  | 28.151298000 | 18.561818000 | 1  | 5.469109000  | 22.091504000 | 21.404339000 |
| 1 | 8.684068000  | 15.912997000 | 19.015847000 | 1  | 6.330497000  | 19.955268000 | 15.683717000 |
| 1 | 6.775157000  | 15.807597000 | 22.941470000 | 1  | 8.061968000  | 19.744030000 | 15.903522000 |
| 1 | 2.897435000  | 13.018421000 | 20.806342000 | 1  | 7.701192000  | 17.413400000 | 16.693786000 |
| 1 | 1.056586000  | 17.944067000 | 20.49054000  | 1  | 6.981264000  | 17.694964000 | 15.101647000 |
| 1 | -2.894539000 | 22.638575000 | 21.975789000 | 1  | 2.531622000  | 18.029430000 | 16.807486000 |
| 1 | -3.435903000 | 26.979010000 | 21.132033000 | 1  | 3.392717000  | 16.724456000 | 17.659012000 |
| 1 | -3.994251000 | 21.680057000 | 12.926155000 | 1  | 2.707329000  | 16.454401000 | 16.034308000 |
| 1 | -2.582467000 | 22.555811000 | 18.908111000 | 1  | 3.615234000  | 25.237602000 | 16.014013000 |
| 1 | 10.093852000 | 22.529084000 | 20.805991000 | 1  | 3.688051000  | 23.463526000 | 15.814087000 |
| 1 | -7.726373000 | 26.678666000 | 15.485335000 | 1  | 5.193771000  | 24.434103000 | 15.779781000 |
| 1 | -8.880322000 | 17.939513000 | 14.590914000 | 16 | 5.192867000  | 27.983505000 | 22.509205000 |
| 8 | -5.321612000 | 27.884803000 | 17.267965000 | 6  | 9.898854000  | 23.280056000 | 18.587116000 |
| 1 | -5.512329000 | 28.047478000 | 16.327615000 | 8  | 10.657962000 | 24.057448000 | 19.173303000 |
| 1 | -5.827165000 | 27.069772000 | 17.518526000 | 7  | 9.699117000  | 21.998357000 | 18.995585000 |
| 1 | -4.993643000 | 15.061036000 | 18.471702000 | 6  | 10.297170000 | 21.479932000 | 20.222689000 |
| 6 | 7.001204000  | 19.298859000 | 18.929588000 | 6  | 11.754647000 | 21.003694000 | 20.077150000 |
| 8 | 4.181456000  | 24.299986000 | 20.152416000 | 6  | 11.970511000 | 19.604488000 | 19.466668000 |
| 6 | 9.060749000  | 23.564570000 | 17.013116000 | 6  | 11.461033000 | 19.475352000 | 18.022312000 |
| 1 | 9.700240000  | 24.181211000 | 16.376352000 | 6  | 13.457763000 | 19.222971000 | 19.542220000 |
| 1 | 8.761182000  | 22.662637000 | 16.471208000 | 1  | 8.967077000  | 21.453985000 | 18.554148000 |
| 1 | 8.153144000  | 24.132710000 | 17.245957000 | 1  | 9.657617000  | 20.665230000 | 20.576015000 |
| 1 | 5.790642000  | 28.580349000 | 21.315170000 | 1  | 12.196192000 | 21.001139000 | 21.084351000 |
|   |              |              |              | 1  | 12.308167000 | 21.758428000 | 19.503012000 |
|   |              |              |              | 1  | 11.413408000 | 18.883432000 | 20.085266000 |
|   |              |              |              | 1  | 11.694105000 | 18.481110000 | 17.619900000 |
|   |              |              |              | 1  | 11.934430000 | 20.220719000 | 17.369917000 |
|   |              |              |              | 1  | 10.377995000 | 19.613821000 | 17.953761000 |
|   |              |              |              | 1  | 13.626232000 | 18.207545000 | 19.163363000 |
|   |              |              |              | 1  | 13.829134000 | 19.261346000 | 20.573546000 |
|   |              |              |              | 1  | 14.068671000 | 19.910360000 | 18.941202000 |
|   |              |              |              | 6  | 9.570449000  | 15.703741000 | 19.362026000 |
|   |              |              |              | 6  | 9.387825000  | 15.860519000 | 20.874044000 |
|   |              |              |              | 8  | 10.311593000 | 15.625125000 | 21.656246000 |
|   |              |              |              | 6  | 10.112983000 | 14.311204000 | 18.998072000 |
|   |              |              |              | 6  | 9.152311000  | 13.137029000 | 19.274624000 |
|   |              |              |              | 6  | 7.863116000  | 13.215212000 | 18.440594000 |
|   |              |              |              | 6  | 9.872734000  | 11.801077000 | 19.034873000 |
|   |              |              |              | 1  | 10.304521000 | 16.457440000 | 19.047748000 |
|   |              |              |              | 1  | 11.036563000 | 14.158719000 | 19.569752000 |
|   |              |              |              | 1  | 10.387366000 | 14.302776000 | 17.932634000 |
|   |              |              |              | 1  | 8.874403000  | 13.178206000 | 20.338181000 |
|   |              |              |              | 1  | 7.228373000  | 12.339604000 | 18.628754000 |
|   |              |              |              | 1  | 7.267928000  | 14.106550000 | 18.666112000 |
|   |              |              |              | 1  | 8.095116000  | 13.226371000 | 17.366292000 |
|   |              |              |              | 1  | 9.219956000  | 10.949905000 | 19.265575000 |
|   |              |              |              | 1  | 10.772625000 | 11.715164000 | 19.656355000 |
|   |              |              |              | 1  | 10.181545000 | 11.705625000 | 17.984646000 |
|   |              |              |              | 7  | 8.150221000  | 16.269747000 | 21.261511000 |
|   |              |              |              | 6  | 7.758439000  | 16.363507000 | 22.658052000 |
|   |              |              |              | 6  | 7.439855000  | 17.795876000 | 23.125918000 |
|   |              |              |              | 8  | 6.439105000  | 18.415897000 | 22.324124000 |
|   |              |              |              | 6  | 8.666286000  | 18.702973000 | 23.130097000 |
|   |              |              |              | 1  | 7.407278000  | 16.355304000 | 20.561108000 |
|   |              |              |              | 1  | 8.578103000  | 15.955538000 | 23.256328000 |
|   |              |              |              | 1  | 7.067798000  | 17.705262000 | 24.162823000 |
|   |              |              |              | 1  | 5.794327000  | 17.737098000 | 21.978797000 |
|   |              |              |              | 1  | 8.382463000  | 19.719867000 | 23.422739000 |
|   |              |              |              | 1  | 9.113402000  | 18.742336000 | 22.131346000 |
|   |              |              |              | 1  | 9.423889000  | 18.333226000 | 23.829955000 |

## P<sup>2</sup>C<sub>6</sub>

|    |             |              |              |  |  |  |  |
|----|-------------|--------------|--------------|--|--|--|--|
| 6  | 3.664982000 | 27.862768000 | 18.560745000 |  |  |  |  |
| 6  | 7.929626000 | 26.119936000 | 20.056069000 |  |  |  |  |
| 6  | 5.796317000 | 24.092687000 | 23.901624000 |  |  |  |  |
| 6  | 1.565369000 | 26.010303000 | 22.507448000 |  |  |  |  |
| 6  | 5.016849000 | 27.55242000  | 18.633276000 |  |  |  |  |
| 6  | 5.996619000 | 27.946186000 | 17.649737000 |  |  |  |  |
| 6  | 7.195915000 | 27.462663000 | 18.077070000 |  |  |  |  |
| 6  | 6.949517000 | 26.775335000 | 19.322267000 |  |  |  |  |
| 6  | 7.709075000 | 25.420546000 | 21.234709000 |  |  |  |  |
| 6  | 8.744470000 | 24.718981000 | 21.956038000 |  |  |  |  |
| 6  | 8.146008000 | 24.145356000 | 23.035538000 |  |  |  |  |
| 6  | 6.746863000 | 24.495288000 | 22.973309000 |  |  |  |  |
| 6  | 4.448749000 | 24.430622000 | 23.855787000 |  |  |  |  |
| 6  | 3.473227000 | 24.061300000 | 24.846383000 |  |  |  |  |
| 6  | 2.287228000 | 24.621179000 | 24.461178000 |  |  |  |  |
| 6  | 2.535106000 | 25.324798000 | 23.229190000 |  |  |  |  |
| 6  | 1.785514000 | 26.671343000 | 21.307216000 |  |  |  |  |
| 6  | 0.728647000 | 27.294320000 | 20.541848000 |  |  |  |  |
| 6  | 1.311242000 | 27.808312000 | 19.425591000 |  |  |  |  |
| 6  | 2.720607000 | 27.500144000 | 19.510217000 |  |  |  |  |
| 7  | 5.615665000 | 26.842924000 | 19.643418000 |  |  |  |  |
| 7  | 6.498400000 | 25.272889000 | 21.865642000 |  |  |  |  |
| 7  | 3.857661000 | 25.185165000 | 22.863663000 |  |  |  |  |
| 7  | 2.991819000 | 26.803193000 | 20.662278000 |  |  |  |  |
| 26 | 4.768003000 | 26.137820000 | 21.308774000 |  |  |  |  |
| 1  | 3.320653000 | 28.425093000 | 17.698036000 |  |  |  |  |
| 1  | 8.941558000 | 26.112208000 | 19.662995000 |  |  |  |  |
| 1  | 6.133353000 | 23.481404000 | 24.733413000 |  |  |  |  |
| 1  | 0.543498000 | 26.000783000 | 22.875969000 |  |  |  |  |
| 6  | 6.213832000 | 21.153324000 | 18.164408000 |  |  |  |  |
| 6  | 5.601322000 | 22.22450000  | 17.476369000 |  |  |  |  |
| 6  | 5.508430000 | 22.117940000 | 20.318420000 |  |  |  |  |
| 6  | 6.164027000 | 21.122727000 | 19.582713000 |  |  |  |  |
| 6  | 6.909354000 | 19.961720000 | 17.738136000 |  |  |  |  |



|   |              |              |              |   |              |              |              |
|---|--------------|--------------|--------------|---|--------------|--------------|--------------|
| 6 | 3.093622000  | 14.229940000 | 21.058841000 | 7 | -4.660765000 | 17.117968000 | 19.248009000 |
| 6 | 1.757781000  | 14.975042000 | 21.034628000 | 6 | -4.332473000 | 15.959266000 | 18.443609000 |
| 8 | 0.702662000  | 14.405023000 | 20.766044000 | 6 | -4.418648000 | 16.161484000 | 16.922154000 |
| 6 | 4.087790000  | 14.672078000 | 19.966685000 | 8 | -4.434951000 | 15.190814000 | 16.174281000 |
| 6 | 4.949972000  | 15.910822000 | 20.286788000 | 1 | -5.567069000 | 17.575981000 | 19.141396000 |
| 8 | 4.718819000  | 16.527136000 | 21.373227000 | 1 | -3.305367000 | 15.670679000 | 18.687212000 |
| 8 | 5.860561000  | 16.195450000 | 19.457038000 | 7 | -4.479055000 | 17.457442000 | 16.484108000 |
| 1 | 3.569714000  | 14.357173000 | 22.038034000 | 6 | -4.371416000 | 17.787377000 | 15.073424000 |
| 1 | 4.795401000  | 13.857853000 | 19.766983000 | 6 | -5.625931000 | 18.413984000 | 14.451207000 |
| 1 | 3.569151000  | 14.840642000 | 19.014241000 | 8 | -5.543520000 | 19.188180000 | 13.497767000 |
| 7 | 1.836773000  | 16.311669000 | 21.323064000 | 1 | -4.344255000 | 18.217767000 | 17.146506000 |
| 6 | 0.707075000  | 17.208941000 | 21.091331000 | 1 | -3.550411000 | 18.488890000 | 14.905904000 |
| 6 | -0.046456000 | 17.585490000 | 22.374082000 | 1 | -4.150302000 | 16.858209000 | 14.537441000 |
| 8 | 0.844430000  | 18.255237000 | 23.297153000 | 7 | -6.809818000 | 18.004797000 | 14.979322000 |
| 6 | -0.723753000 | 16.399972000 | 23.055950000 | 6 | -8.089222000 | 18.535044000 | 14.523083000 |
| 1 | 2.783075000  | 16.685803000 | 21.409827000 | 6 | -8.490551000 | 19.799134000 | 15.305880000 |
| 1 | 0.011819000  | 16.728832000 | 20.398482000 | 8 | -9.374540000 | 19.771996000 | 16.159758000 |
| 1 | -0.792099000 | 18.339866000 | 22.113821000 | 1 | -6.779211000 | 17.494285000 | 15.851532000 |
| 1 | 1.631853000  | 17.690384000 | 23.378565000 | 1 | -7.992063000 | 18.747809000 | 13.454827000 |
| 1 | -1.233616000 | 16.734595000 | 23.966433000 | 7 | -7.747448000 | 20.888624000 | 14.993771000 |
| 1 | 0.007125000  | 15.630018000 | 23.327255000 | 6 | -7.745077000 | 22.090764000 | 15.804995000 |
| 1 | -1.453836000 | 15.944064000 | 22.380202000 | 6 | -7.698903000 | 23.328599000 | 14.889540000 |
| 6 | -2.258343000 | 23.504347000 | 22.402633000 | 8 | -7.829779000 | 23.238160000 | 13.672686000 |
| 6 | -2.441869000 | 24.916889000 | 21.847990000 | 6 | -6.591088000 | 22.045412000 | 16.813404000 |
| 8 | -1.765582000 | 25.863460000 | 22.277264000 | 8 | -5.349504000 | 21.974647000 | 16.097359000 |
| 6 | -0.807784000 | 23.026342000 | 22.233812000 | 1 | -7.015751000 | 20.799077000 | 14.297043000 |
| 6 | -0.646237000 | 21.536623000 | 22.505724000 | 1 | -8.686583000 | 22.100218000 | 16.365441000 |
| 8 | -1.485241000 | 20.712386000 | 22.105499000 | 1 | -6.584964000 | 22.899457000 | 17.497730000 |
| 7 | 0.464376000  | 21.156366000 | 23.166956000 | 1 | -6.728285000 | 21.144363000 | 17.421178000 |
| 1 | -2.514254000 | 23.522974000 | 23.469653000 | 1 | -4.768468000 | 21.391165000 | 16.626923000 |
| 1 | -0.134318000 | 23.621718000 | 22.854961000 | 7 | -7.521570000 | 24.513743000 | 15.541908000 |
| 1 | -0.488530000 | 23.189529000 | 21.195024000 | 6 | -7.337690000 | 25.739611000 | 14.797782000 |
| 1 | 1.148149000  | 21.840259000 | 23.460660000 | 6 | -5.880664000 | 26.167035000 | 14.561459000 |
| 1 | 0.677161000  | 20.157671000 | 23.268585000 | 8 | -5.647487000 | 27.263608000 | 14.045552000 |
| 7 | -3.367572000 | 25.024698000 | 20.878131000 | 1 | -7.272230000 | 24.564711000 | 16.537343000 |
| 6 | -3.740635000 | 26.274999000 | 20.223985000 | 1 | -7.796919000 | 25.619468000 | 13.813120000 |
| 6 | -5.240439000 | 26.270288000 | 19.891512000 | 7 | -4.934004000 | 25.287074000 | 14.962020000 |
| 6 | -5.665933000 | 25.121023000 | 18.945115000 | 6 | -3.503994000 | 25.458669000 | 14.730906000 |
| 8 | -6.403791000 | 25.440597000 | 17.957241000 | 6 | -2.963575000 | 24.383411000 | 13.765033000 |
| 8 | -5.277472000 | 23.954919000 | 19.225406000 | 8 | -2.232176000 | 24.707770000 | 12.829021000 |
| 1 | -3.914226000 | 24.228739000 | 20.541328000 | 6 | -2.715916000 | 25.534784000 | 16.074213000 |
| 1 | -3.161139000 | 26.415422000 | 19.301395000 | 8 | -2.899608000 | 26.778768000 | 16.718072000 |
| 1 | -5.508531000 | 27.233669000 | 19.451925000 | 6 | -1.209177000 | 25.385154000 | 15.868557000 |
| 1 | -5.812712000 | 26.156141000 | 20.823497000 | 1 | -5.247237000 | 24.486746000 | 15.499354000 |
| 6 | -2.365669000 | 21.685394000 | 18.333519000 | 1 | -3.379281000 | 26.411014000 | 14.213591000 |
| 6 | -3.384120000 | 20.644861000 | 18.749794000 | 1 | -3.077069000 | 24.707151000 | 16.712311000 |
| 8 | -4.209667000 | 20.170119000 | 17.922199000 | 1 | -3.850541000 | 27.033049000 | 16.802530000 |
| 6 | -0.895753000 | 21.248557000 | 18.547099000 | 1 | -0.705323000 | 25.550993000 | 16.825840000 |
| 6 | 0.044343000  | 22.406277000 | 18.162203000 | 1 | -0.847740000 | 26.131786000 | 15.153533000 |
| 6 | -0.582505000 | 19.951741000 | 17.785957000 | 1 | -0.942124000 | 24.391424000 | 15.497857000 |
| 6 | 1.507417000  | 22.184601000 | 18.556760000 | 7 | -3.304063000 | 23.090334000 | 14.036487000 |
| 1 | -2.540495000 | 21.907717000 | 17.276276000 | 6 | -3.046279000 | 21.990501000 | 13.105537000 |
| 1 | -0.753850000 | 21.048741000 | 19.617893000 | 6 | -2.096317000 | 20.897652000 | 13.629588000 |
| 1 | -0.022986000 | 22.581971000 | 17.079877000 | 6 | -0.592650000 | 21.141997000 | 13.599582000 |
| 1 | -0.317770000 | 23.327421000 | 18.641222000 | 6 | 0.262867000  | 20.076892000 | 13.936430000 |
| 1 | 0.451458000  | 19.636460000 | 17.960435000 | 6 | -0.014274000 | 22.365099000 | 13.236824000 |
| 1 | -0.704833000 | 20.092431000 | 16.704995000 | 6 | 1.650647000  | 20.218876000 | 13.922547000 |
| 1 | -1.227552000 | 19.127683000 | 18.111180000 | 6 | 1.378223000  | 22.512235000 | 13.220790000 |
| 1 | 2.098591000  | 23.086792000 | 18.377243000 | 6 | 2.212202000  | 21.448349000 | 13.562043000 |
| 1 | 1.596607000  | 21.938058000 | 19.623543000 | 1 | -4.012533000 | 22.902945000 | 14.741746000 |
| 1 | 1.967539000  | 21.368431000 | 17.989986000 | 1 | -2.669879000 | 22.429934000 | 12.179010000 |
| 7 | -3.367826000 | 20.258987000 | 20.032467000 | 1 | -2.400867000 | 20.649847000 | 14.657850000 |
| 6 | -4.162095000 | 19.153883000 | 20.585424000 | 1 | -2.308732000 | 19.991857000 | 13.043934000 |
| 6 | -3.705357000 | 17.828561000 | 19.909398000 | 1 | -0.170673000 | 19.115098000 | 14.207946000 |
| 8 | -2.530470000 | 17.482872000 | 19.989059000 | 1 | -0.639888000 | 23.208602000 | 12.959269000 |
| 6 | -5.687657000 | 19.430335000 | 20.657231000 | 1 | 2.301089000  | 19.386996000 | 14.184060000 |
| 8 | -6.354434000 | 19.250480000 | 19.401333000 | 1 | 1.804635000  | 23.471082000 | 12.933741000 |
| 6 | -6.011867000 | 20.802350000 | 21.251076000 | 1 | 3.293428000  | 21.562240000 | 13.542744000 |
| 1 | -2.631425000 | 20.607194000 | 20.654571000 | 1 | 3.683831000  | 23.466073000 | 25.726457000 |
| 1 | -3.811711000 | 19.069109000 | 21.618675000 | 1 | 1.329502000  | 24.588098000 | 24.966240000 |
| 1 | -6.105711000 | 18.651280000 | 21.308163000 | 1 | 9.774431000  | 24.662974000 | 21.629033000 |
| 1 | -5.798358000 | 19.709988000 | 18.734567000 | 1 | 8.590801000  | 23.528604000 | 23.806791000 |
| 1 | -7.094136000 | 20.882966000 | 21.392917000 | 1 | 5.775660000  | 28.511360000 | 16.752705000 |
| 1 | -5.698762000 | 21.616603000 | 20.588850000 | 1 | 8.167252000  | 27.546949000 | 17.605964000 |
| 1 | -5.522406000 | 20.937968000 | 22.223684000 | 1 | -0.311825000 | 27.284068000 | 20.840965000 |

|            |              |              |              |    |              |              |              |
|------------|--------------|--------------|--------------|----|--------------|--------------|--------------|
| 1          | 0.842139000  | 28.331762000 | 18.601909000 | 1  | 5.592141000  | 22.197554000 | 16.412017000 |
| 1          | 8.637404000  | 15.916484000 | 18.829758000 | 1  | 5.464938000  | 22.051874000 | 21.425021000 |
| 1          | 6.868419000  | 15.741884000 | 22.812413000 | 1  | 6.303481000  | 19.902516000 | 15.704683000 |
| 1          | 2.844536000  | 13.173168000 | 20.929695000 | 1  | 8.035435000  | 19.693987000 | 15.922874000 |
| 1          | 1.086716000  | 18.126143000 | 20.626589000 | 1  | 7.676290000  | 17.361355000 | 16.713296000 |
| 1          | -2.936270000 | 22.796191000 | 21.918051000 | 1  | 6.961081000  | 17.643932000 | 15.119048000 |
| 1          | -3.491967000 | 27.097436000 | 20.900997000 | 1  | 2.507184000  | 17.981348000 | 16.812568000 |
| 1          | -4.006048000 | 21.507357000 | 12.891279000 | 1  | 3.363480000  | 16.675402000 | 17.667243000 |
| 1          | -2.575441000 | 22.609710000 | 18.887735000 | 1  | 2.682368000  | 16.405535000 | 16.040738000 |
| 1          | 10.260117000 | 22.276531000 | 20.971668000 | 1  | 3.610989000  | 25.197837000 | 16.034019000 |
| 1          | -7.836529000 | 26.568418000 | 15.309906000 | 1  | 3.665796000  | 23.422379000 | 15.841902000 |
| 1          | -8.865792000 | 17.783739000 | 14.679702000 | 1  | 5.180152000  | 24.378002000 | 15.793186000 |
| 8          | -5.451939000 | 27.853793000 | 17.033866000 | 16 | 5.187837000  | 28.331622000 | 22.559502000 |
| 1          | -5.642557000 | 27.975985000 | 16.087251000 | 6  | 9.838792000  | 23.298544000 | 18.574690000 |
| 1          | -5.945270000 | 27.041663000 | 17.316437000 | 8  | 10.605260000 | 24.080548000 | 19.145805000 |
| 1          | -4.982921000 | 15.112353000 | 18.685904000 | 7  | 9.641296000  | 22.021130000 | 18.995708000 |
| 6          | 7.241264000  | 19.290075000 | 18.896921000 | 6  | 10.249840000 | 21.510099000 | 20.220921000 |
| 6          | 9.111113000  | 23.705676000 | 17.357304000 | 6  | 11.706369000 | 21.034001000 | 20.065687000 |
| 1          | 9.731010000  | 24.381455000 | 16.762087000 | 6  | 11.917792000 | 19.631470000 | 19.461265000 |
| 1          | 8.790474000  | 22.860881000 | 16.740878000 | 6  | 11.392371000 | 19.492522000 | 18.023576000 |
| 1          | 8.216454000  | 24.252745000 | 17.674378000 | 6  | 13.406442000 | 19.252930000 | 19.523108000 |
| 1          | 4.714993000  | 28.885893000 | 21.621721000 | 1  | 8.904971000  | 21.474101000 | 18.564953000 |
| 8          | 4.149906000  | 24.118196000 | 20.265418000 | 1  | 9.613465000  | 20.696811000 | 20.583185000 |
| 1          | 3.911942000  | 23.803000000 | 21.155938000 | 1  | 12.156755000 | 21.037596000 | 21.069003000 |
| $P^4_{C6}$ |              |              |              | 1  | 12.254399000 | 21.785696000 | 19.482357000 |
| 6          | 3.655860000  | 27.955857000 | 18.513851000 | 1  | 11.368308000 | 18.913393000 | 20.090089000 |
| 6          | 7.957437000  | 26.221555000 | 20.003029000 | 1  | 11.627001000 | 18.497754000 | 17.623308000 |
| 6          | 5.848942000  | 24.379048000 | 23.955970000 | 1  | 11.853638000 | 20.237502000 | 17.362112000 |
| 6          | 1.531245000  | 26.063960000 | 22.426720000 | 1  | 10.307663000 | 19.623551000 | 17.967498000 |
| 6          | 5.031286000  | 27.718778000 | 18.611300000 | 1  | 13.572460000 | 18.235211000 | 19.149391000 |
| 6          | 6.010769000  | 28.099519000 | 17.616692000 | 1  | 13.789329000 | 19.299090000 | 20.549935000 |
| 6          | 7.214724000  | 27.609403000 | 18.030054000 | 1  | 14.009470000 | 19.937122000 | 18.910577000 |
| 6          | 6.987247000  | 26.926805000 | 19.285321000 | 6  | 9.557690000  | 15.658543000 | 19.356736000 |
| 6          | 7.767623000  | 25.508925000 | 21.191250000 | 6  | 9.375504000  | 15.801907000 | 20.870161000 |
| 6          | 8.806150000  | 24.820040000 | 21.928939000 | 8  | 10.298431000 | 15.556796000 | 21.650410000 |
| 6          | 8.216536000  | 24.311147000 | 23.049649000 | 6  | 10.106438000 | 14.272173000 | 18.979586000 |
| 6          | 6.817034000  | 24.680374000 | 22.993769000 | 6  | 9.151236000  | 13.091141000 | 19.245794000 |
| 6          | 4.493012000  | 24.720894000 | 23.920053000 | 6  | 7.859683000  | 13.172520000 | 18.415684000 |
| 6          | 3.518265000  | 24.380240000 | 24.928104000 | 6  | 9.876656000  | 11.760853000 | 18.990146000 |
| 6          | 2.310542000  | 24.855720000 | 24.497504000 | 1  | 10.287197000 | 16.419218000 | 19.048375000 |
| 6          | 2.531329000  | 25.490606000 | 23.219298000 | 1  | 11.031009000 | 14.118274000 | 19.549270000 |
| 6          | 1.705700000  | 26.683044000 | 21.186874000 | 1  | 10.380123000 | 14.274943000 | 17.913925000 |
| 6          | 0.642151000  | 27.236063000 | 20.370863000 | 1  | 8.875883000  | 13.119961000 | 20.310419000 |
| 6          | 1.238149000  | 27.771420000 | 19.267612000 | 1  | 7.229349000  | 12.292066000 | 18.595971000 |
| 6          | 2.664775000  | 27.545675000 | 19.408242000 | 1  | 7.260931000  | 14.058678000 | 18.651926000 |
| 7          | 5.657054000  | 27.025549000 | 19.616602000 | 1  | 8.089040000  | 13.196115000 | 17.341001000 |
| 7          | 6.576036000  | 25.393623000 | 21.851297000 | 1  | 9.228243000  | 10.904503000 | 19.213954000 |
| 7          | 3.866416000  | 25.388447000 | 22.888669000 | 1  | 10.778821000 | 11.672394000 | 19.607974000 |
| 7          | 2.911548000  | 26.876709000 | 20.573875000 | 1  | 10.182594000 | 11.677650000 | 17.938036000 |
| 26         | 4.789322000  | 26.381870000 | 21.330473000 | 7  | 8.139541000  | 16.213087000 | 21.260704000 |
| 1          | 3.322523000  | 28.497832000 | 17.632843000 | 6  | 7.748839000  | 16.299615000 | 22.657900000 |
| 1          | 8.959799000  | 26.195464000 | 19.584747000 | 6  | 7.429093000  | 17.729501000 | 23.132271000 |
| 1          | 6.182286000  | 23.819902000 | 24.826218000 | 8  | 6.424300000  | 18.350774000 | 22.336668000 |
| 1          | 0.508728000  | 26.008044000 | 22.791744000 | 6  | 8.653650000  | 18.639284000 | 23.135428000 |
| 6          | 6.192880000  | 21.102104000 | 18.184457000 | 1  | 7.395502000  | 16.301698000 | 20.561672000 |
| 6          | 5.578893000  | 22.170699000 | 17.495715000 | 1  | 8.569439000  | 15.889722000 | 23.253577000 |
| 6          | 5.501189000  | 22.078056000 | 20.338675000 | 1  | 7.061290000  | 17.634104000 | 24.170349000 |
| 6          | 6.149525000  | 21.077063000 | 19.602500000 | 1  | 5.780553000  | 17.672412000 | 21.989597000 |
| 6          | 6.884713000  | 19.908007000 | 17.758465000 | 1  | 8.369280000  | 19.653387000 | 23.437096000 |
| 6          | 4.929795000  | 23.164157000 | 18.216668000 | 1  | 9.094492000  | 18.686869000 | 22.134193000 |
| 6          | 4.883771000  | 23.103622000 | 19.640935000 | 1  | 9.416227000  | 18.266439000 | 23.828245000 |
| 7          | 6.812085000  | 19.946129000 | 20.028160000 | 6  | 3.073070000  | 14.168878000 | 21.050651000 |
| 1          | 6.733033000  | 19.506028000 | 20.952754000 | 6  | 1.739648000  | 14.917693000 | 21.016087000 |
| 6          | 7.053592000  | 19.421952000 | 16.342417000 | 8  | 0.685047000  | 14.350988000 | 20.738490000 |
| 6          | 6.881212000  | 17.895413000 | 16.182023000 | 6  | 4.077213000  | 14.608370000 | 19.966777000 |
| 7          | 5.611366000  | 17.390375000 | 16.681795000 | 6  | 4.936709000  | 15.847946000 | 20.291285000 |
| 6          | 4.455029000  | 17.614047000 | 16.006618000 | 8  | 4.703031000  | 16.461417000 | 21.378709000 |
| 6          | 3.185042000  | 17.130324000 | 16.689719000 | 8  | 5.848004000  | 16.135218000 | 19.463332000 |
| 8          | 4.421756000  | 18.167186000 | 14.902825000 | 1  | 3.541826000  | 14.294774000 | 22.033556000 |
| 1          | 5.589787000  | 16.986238000 | 17.617886000 | 1  | 4.786935000  | 13.793620000 | 19.776412000 |
| 8          | 4.273736000  | 24.233421000 | 17.666956000 | 1  | 3.568079000  | 14.774049000 | 19.008784000 |
| 6          | 4.185872000  | 24.296797000 | 16.255743000 | 7  | 1.819960000  | 16.253900000 | 21.306485000 |
| 1          | 7.677837000  | 18.269741000 | 19.048387000 | 6  | 0.693993000  | 17.154062000 | 21.068297000 |
|            |              |              |              | 6  | -0.068987000 | 17.526992000 | 22.346571000 |
|            |              |              |              | 8  | 0.816740000  | 18.189623000 | 23.279627000 |

|   |              |              |              |   |              |              |              |
|---|--------------|--------------|--------------|---|--------------|--------------|--------------|
| 6 | -0.754941000 | 16.340468000 | 23.017927000 | 6 | -8.062914000 | 18.548338000 | 14.477169000 |
| 1 | 2.766553000  | 16.625570000 | 21.401070000 | 6 | -8.467661000 | 19.806218000 | 15.268218000 |
| 1 | 0.003468000  | 16.677799000 | 20.368148000 | 8 | -9.359131000 | 19.773640000 | 16.114075000 |
| 1 | -0.810816000 | 18.284522000 | 22.084489000 | 1 | -6.761702000 | 17.493851000 | 15.803685000 |
| 1 | 1.602735000  | 17.623030000 | 23.362901000 | 1 | -7.959253000 | 18.770408000 | 13.411407000 |
| 1 | -1.270607000 | 16.672685000 | 23.926023000 | 7 | -7.719603000 | 20.896754000 | 14.971956000 |
| 1 | -0.028349000 | 15.567225000 | 23.291247000 | 6 | -7.722930000 | 22.092556000 | 15.792419000 |
| 1 | -1.481232000 | 15.889749000 | 22.334702000 | 6 | -7.668187000 | 23.337407000 | 14.886926000 |
| 6 | -2.268315000 | 23.456985000 | 22.418123000 | 8 | -7.786998000 | 23.256274000 | 13.668183000 |
| 6 | -2.447344000 | 24.869216000 | 21.862236000 | 6 | -6.576888000 | 22.038924000 | 16.809508000 |
| 8 | -1.754713000 | 25.811217000 | 22.275829000 | 8 | -5.329643000 | 21.974626000 | 16.102484000 |
| 6 | -0.817210000 | 22.975597000 | 22.265967000 | 1 | -6.982855000 | 20.812135000 | 14.279917000 |
| 6 | -0.667554000 | 21.481720000 | 22.525461000 | 1 | -8.668876000 | 22.098417000 | 16.345355000 |
| 8 | -1.517010000 | 20.667715000 | 22.127352000 | 1 | -6.576579000 | 22.887141000 | 17.501052000 |
| 7 | 0.444679000  | 21.087069000 | 23.175940000 | 1 | -6.718322000 | 21.132897000 | 17.408854000 |
| 1 | -2.536502000 | 23.474854000 | 23.482279000 | 1 | -4.754710000 | 21.380724000 | 16.627095000 |
| 1 | -0.150146000 | 23.561261000 | 22.904248000 | 7 | -7.496754000 | 24.517433000 | 15.549996000 |
| 1 | -0.480613000 | 23.148100000 | 21.234260000 | 6 | -7.308008000 | 25.749506000 | 14.817479000 |
| 1 | 1.142012000  | 21.762634000 | 23.454454000 | 6 | -5.849786000 | 26.181827000 | 14.597886000 |
| 1 | 0.653842000  | 20.086063000 | 23.264268000 | 8 | -5.614336000 | 27.282509000 | 14.091972000 |
| 7 | -3.391141000 | 24.985912000 | 20.911386000 | 1 | -7.259120000 | 24.561092000 | 16.548641000 |
| 6 | -3.764372000 | 26.242043000 | 20.268001000 | 1 | -7.757472000 | 25.636120000 | 13.827501000 |
| 6 | -5.264279000 | 26.239324000 | 19.936376000 | 7 | -4.904494000 | 25.301031000 | 15.000298000 |
| 6 | -5.686775000 | 25.096778000 | 18.980889000 | 6 | -3.473438000 | 25.474582000 | 14.776602000 |
| 8 | -6.409189000 | 25.424834000 | 17.984575000 | 6 | -2.927910000 | 24.404451000 | 13.807549000 |
| 8 | -5.309627000 | 23.927346000 | 19.262585000 | 8 | -2.190940000 | 24.734020000 | 12.877782000 |
| 1 | -3.945838000 | 24.194127000 | 20.577429000 | 6 | -2.690648000 | 25.545435000 | 16.123192000 |
| 1 | -3.185151000 | 26.391202000 | 19.346519000 | 8 | -2.883083000 | 26.784149000 | 16.774995000 |
| 1 | -5.532592000 | 27.206005000 | 19.504351000 | 6 | -1.182385000 | 25.405085000 | 15.922020000 |
| 1 | -5.835845000 | 26.117100000 | 20.867687000 | 1 | -5.220847000 | 24.495645000 | 15.528040000 |
| 6 | -2.372539000 | 21.668455000 | 18.350888000 | 1 | -3.347539000 | 26.429625000 | 14.264531000 |
| 6 | -3.388287000 | 20.618673000 | 18.750026000 | 1 | -3.049800000 | 24.711681000 | 16.754417000 |
| 8 | -4.206022000 | 20.147768000 | 17.912577000 | 1 | -3.835780000 | 27.032188000 | 16.858626000 |
| 6 | -0.901802000 | 21.238339000 | 18.572513000 | 1 | -0.682281000 | 25.570013000 | 16.881517000 |
| 6 | 0.035397000  | 22.404969000 | 18.207821000 | 1 | -0.823018000 | 26.156401000 | 15.210843000 |
| 6 | -0.574384000 | 19.950703000 | 17.801804000 | 1 | -0.908519000 | 24.414427000 | 15.548128000 |
| 6 | 1.494529000  | 22.189838000 | 18.620277000 | 7 | -3.271729000 | 23.110147000 | 14.068710000 |
| 1 | -2.540450000 | 21.899185000 | 17.294339000 | 6 | -3.014045000 | 22.016302000 | 13.130562000 |
| 1 | -0.767931000 | 21.028667000 | 19.642450000 | 6 | -2.071235000 | 20.915637000 | 13.651055000 |
| 1 | -0.019340000 | 22.587757000 | 17.125948000 | 6 | -0.566391000 | 21.152762000 | 13.626853000 |
| 1 | -0.339070000 | 23.320461000 | 18.688270000 | 6 | 0.282886000  | 20.080927000 | 13.958128000 |
| 1 | 0.460332000  | 19.640736000 | 17.981104000 | 6 | 0.018940000  | 22.375646000 | 13.274721000 |
| 1 | -0.689316000 | 20.100659000 | 16.721315000 | 6 | 1.671411000  | 20.215777000 | 13.948840000 |
| 1 | -1.216640000 | 19.119563000 | 18.114465000 | 6 | 1.412216000  | 22.515594000 | 13.262844000 |
| 1 | 2.082723000  | 23.096895000 | 18.456468000 | 6 | 2.239922000  | 21.444930000 | 13.598298000 |
| 1 | 1.571575000  | 21.935729000 | 19.686112000 | 1 | -3.983837000 | 22.919026000 | 14.769273000 |
| 1 | 1.967452000  | 21.381062000 | 18.053483000 | 1 | -2.631608000 | 22.460996000 | 12.209061000 |
| 7 | -3.379391000 | 20.220844000 | 20.029175000 | 1 | -2.380252000 | 20.663486000 | 14.676935000 |
| 6 | -4.173725000 | 19.107881000 | 20.566067000 | 1 | -2.286314000 | 20.014331000 | 13.059500000 |
| 6 | -3.711027000 | 17.790746000 | 19.878094000 | 1 | -0.156225000 | 19.119427000 | 14.221616000 |
| 8 | -2.535726000 | 17.446756000 | 19.959470000 | 1 | -0.601719000 | 23.224400000 | 13.002031000 |
| 6 | -5.700206000 | 19.380464000 | 20.633840000 | 1 | 2.316650000  | 19.378486000 | 14.206117000 |
| 8 | -6.361020000 | 19.212344000 | 19.373126000 | 1 | 1.844339000  | 23.474199000 | 12.983599000 |
| 6 | -6.030237000 | 20.745373000 | 21.240703000 | 1 | 3.321731000  | 21.553601000 | 13.582167000 |
| 1 | -2.650282000 | 20.567663000 | 20.660110000 | 1 | 3.738067000  | 23.845271000 | 25.844042000 |
| 1 | -3.828077000 | 19.012531000 | 21.599994000 | 1 | 1.350958000  | 24.797890000 | 24.996804000 |
| 1 | -6.119609000 | 18.593858000 | 21.274761000 | 1 | 9.832518000  | 24.732782000 | 21.597568000 |
| 1 | -5.802022000 | 19.677841000 | 18.713060000 | 1 | 8.675196000  | 23.732405000 | 23.842218000 |
| 1 | -7.113221000 | 20.821638000 | 21.379426000 | 1 | 5.787327000  | 28.649944000 | 16.710991000 |
| 1 | -5.717126000 | 21.567456000 | 20.588257000 | 1 | 8.174238000  | 27.678847000 | 17.532842000 |
| 1 | -5.544667000 | 20.871977000 | 22.216482000 | 1 | -0.407312000 | 27.190406000 | 20.632180000 |
| 7 | -4.662113000 | 17.084059000 | 19.206624000 | 1 | 0.762445000  | 28.264544000 | 18.428954000 |
| 6 | -4.328461000 | 15.932279000 | 18.394561000 | 1 | 8.623132000  | 15.871710000 | 18.827347000 |
| 6 | -4.406774000 | 16.147017000 | 16.874406000 | 1 | 6.859589000  | 15.676346000 | 22.810509000 |
| 8 | -4.421562000 | 15.182554000 | 16.118541000 | 1 | 2.822077000  | 13.112830000 | 20.919219000 |
| 1 | -5.568667000 | 17.541371000 | 19.099407000 | 1 | 1.079228000  | 18.072135000 | 20.609979000 |
| 1 | -3.302391000 | 15.642549000 | 18.641087000 | 1 | -2.941634000 | 22.749284000 | 21.926773000 |
| 7 | -4.464199000 | 17.446630000 | 16.446905000 | 1 | -3.515820000 | 27.058962000 | 20.951829000 |
| 6 | -4.349403000 | 17.788231000 | 15.039560000 | 1 | -3.974929000 | 21.538984000 | 12.908304000 |
| 6 | -5.599520000 | 18.423288000 | 14.417163000 | 1 | -2.592099000 | 22.586583000 | 18.911687000 |
| 8 | -5.510818000 | 19.205247000 | 13.470613000 | 1 | 10.218334000 | 22.310688000 | 20.965984000 |
| 1 | -4.331520000 | 18.201210000 | 17.116229000 | 1 | -7.813570000 | 26.573352000 | 15.331033000 |
| 1 | -3.525903000 | 18.489054000 | 14.881644000 | 1 | -8.841357000 | 17.796735000 | 14.622641000 |
| 1 | -4.128104000 | 16.863066000 | 14.496769000 | 8 | -5.441376000 | 27.843796000 | 17.090141000 |
| 7 | -6.786838000 | 18.012289000 | 14.935989000 | 1 | -5.625344000 | 27.976793000 | 16.143678000 |

|   |              |              |              |
|---|--------------|--------------|--------------|
| 1 | -5.937901000 | 27.029391000 | 17.360239000 |
| 1 | -4.979464000 | 15.082916000 | 18.626569000 |
| 6 | 7.221476000  | 19.239165000 | 18.916963000 |
| 6 | 9.039324000  | 23.716028000 | 17.349704000 |
| 1 | 9.663348000  | 24.365613000 | 16.729899000 |
| 1 | 8.687938000  | 22.867039000 | 16.756619000 |
| 1 | 8.163487000  | 24.290199000 | 17.671352000 |
| 1 | 5.816143000  | 29.028906000 | 21.585160000 |
| 8 | 4.167775000  | 24.095692000 | 20.271694000 |
| 1 | 4.067325000  | 23.880144000 | 21.215500000 |

# TS1<sup>2</sup><sub>HA</sub>

|    |              |              |              |
|----|--------------|--------------|--------------|
| 6  | 2.802203000  | 25.522751000 | 17.455373000 |
| 6  | 7.354717000  | 26.992382000 | 16.720586000 |
| 6  | 8.307123000  | 26.225877000 | 21.405121000 |
| 6  | 3.734220000  | 24.846366000 | 22.143728000 |
| 6  | 3.975485000  | 25.960314000 | 16.842667000 |
| 6  | 4.073784000  | 26.303013000 | 15.443256000 |
| 6  | 5.352759000  | 26.718692000 | 15.231400000 |
| 6  | 6.031483000  | 26.627458000 | 16.501920000 |
| 6  | 8.020838000  | 26.923082000 | 17.941427000 |
| 6  | 9.394716000  | 27.302492000 | 18.155551000 |
| 6  | 9.661671000  | 27.071757000 | 19.472999000 |
| 6  | 8.449640000  | 26.557743000 | 20.060328000 |
| 6  | 7.141180000  | 25.800932000 | 22.026091000 |
| 6  | 7.027357000  | 25.477985000 | 23.429912000 |
| 6  | 5.738823000  | 25.094046000 | 23.638975000 |
| 6  | 5.067284000  | 25.180286000 | 22.362351000 |
| 6  | 3.075247000  | 24.906534000 | 20.921768000 |
| 6  | 1.684194000  | 24.553222000 | 20.719196000 |
| 6  | 1.428336000  | 24.750189000 | 19.398279000 |
| 6  | 2.662597000  | 25.218015000 | 18.803608000 |
| 7  | 5.179095000  | 26.153270000 | 17.466521000 |
| 7  | 7.462864000  | 26.467537000 | 19.110081000 |
| 7  | 5.933471000  | 25.624034000 | 21.400065000 |
| 7  | 3.650941000  | 25.312185000 | 19.745407000 |
| 26 | 5.578788000  | 25.823494000 | 19.407909000 |
| 1  | 1.910445000  | 25.418021000 | 16.842020000 |
| 1  | 7.915250000  | 27.367655000 | 15.869028000 |
| 1  | 9.189185000  | 26.329269000 | 22.031059000 |
| 1  | 3.158826000  | 24.502424000 | 22.998269000 |
| 6  | 6.743194000  | 19.652103000 | 19.527795000 |
| 6  | 7.007912000  | 20.933691000 | 19.016611000 |
| 6  | 9.154865000  | 19.158037000 | 19.643450000 |
| 6  | 7.823858000  | 18.777849000 | 19.848016000 |
| 6  | 5.520907000  | 18.962067000 | 19.855361000 |
| 6  | 8.335371000  | 21.290511000 | 18.811519000 |
| 6  | 9.404027000  | 20.421249000 | 19.116748000 |
| 7  | 7.275141000  | 17.630816000 | 20.384852000 |
| 1  | 7.704784000  | 16.719072000 | 20.531328000 |
| 6  | 4.126254000  | 19.453306000 | 19.597687000 |
| 6  | 3.685587000  | 19.330597000 | 18.124627000 |
| 7  | 3.374250000  | 17.966056000 | 17.723010000 |
| 6  | 2.378948000  | 17.709073000 | 16.830810000 |
| 6  | 2.234672000  | 16.248829000 | 16.422686000 |
| 8  | 1.639603000  | 18.582151000 | 16.364519000 |
| 1  | 3.931923000  | 17.181054000 | 18.070566000 |
| 8  | 8.706016000  | 22.538035000 | 18.307392000 |
| 6  | 7.754561000  | 23.317586000 | 17.677347000 |
| 1  | 5.299640000  | 16.916257000 | 20.710324000 |
| 1  | 6.203941000  | 21.639456000 | 18.839045000 |
| 1  | 9.977488000  | 18.488640000 | 19.881129000 |
| 1  | 10.421420000 | 20.752584000 | 18.935162000 |
| 1  | 3.410653000  | 18.911455000 | 20.227974000 |
| 1  | 4.047701000  | 20.512753000 | 19.877052000 |
| 1  | 4.474260000  | 19.747113000 | 17.480017000 |
| 1  | 2.785043000  | 19.921675000 | 17.947457000 |
| 1  | 1.206346000  | 15.925615000 | 16.618309000 |
| 1  | 2.936439000  | 15.594298000 | 16.945689000 |
| 1  | 2.393275000  | 16.176806000 | 15.340505000 |
| 1  | 8.238671000  | 24.190798000 | 17.242815000 |
| 1  | 6.856526000  | 23.832926000 | 18.549820000 |
| 1  | 7.109526000  | 22.758879000 | 16.992625000 |
| 16 | 5.083848000  | 28.137327000 | 20.002058000 |

|   |              |              |              |
|---|--------------|--------------|--------------|
| 6 | 12.562770000 | 23.351906000 | 17.933519000 |
| 8 | 13.742240000 | 23.346964000 | 17.584849000 |
| 7 | 11.573397000 | 22.777850000 | 17.190682000 |
| 6 | 11.868745000 | 22.047406000 | 15.963043000 |
| 6 | 12.134131000 | 22.905917000 | 14.713228000 |
| 6 | 10.934851000 | 23.692170000 | 14.139175000 |
| 6 | 10.635007000 | 24.982808000 | 14.918345000 |
| 6 | 11.173008000 | 24.019444000 | 12.655670000 |
| 1 | 10.627210000 | 22.754373000 | 17.556947000 |
| 1 | 11.025735000 | 21.371182000 | 15.780269000 |
| 1 | 12.496830000 | 22.211623000 | 13.940762000 |
| 1 | 12.965923000 | 23.587949000 | 14.929837000 |
| 1 | 10.046100000 | 23.044103000 | 14.197660000 |
| 1 | 9.762856000  | 25.498493000 | 14.497018000 |
| 1 | 11.489746000 | 25.670812000 | 14.864777000 |
| 1 | 10.435779000 | 24.788345000 | 15.975101000 |
| 1 | 10.328578000 | 24.575592000 | 12.230328000 |
| 1 | 11.310197000 | 23.108371000 | 12.060440000 |
| 1 | 12.073426000 | 24.636598000 | 12.532573000 |
| 6 | 8.891848000  | 18.359814000 | 24.523979000 |
| 6 | 9.248233000  | 16.874157000 | 24.391480000 |
| 8 | 9.943621000  | 16.291047000 | 25.224025000 |
| 6 | 9.969959000  | 19.157774000 | 25.268340000 |
| 6 | 11.304890000 | 19.327282000 | 24.515295000 |
| 6 | 11.167401000 | 20.193047000 | 23.253130000 |
| 6 | 12.369733000 | 19.915224000 | 25.454165000 |
| 1 | 7.952154000  | 18.412647000 | 25.092228000 |
| 1 | 10.164903000 | 18.640651000 | 26.214896000 |
| 1 | 9.570427000  | 20.152094000 | 25.516035000 |
| 1 | 11.643049000 | 18.325295000 | 24.216260000 |
| 1 | 12.131939000 | 20.290986000 | 22.739268000 |
| 1 | 10.455056000 | 19.778555000 | 22.531939000 |
| 1 | 10.825209000 | 21.205085000 | 23.508818000 |
| 1 | 13.336848000 | 20.017313000 | 24.945979000 |
| 1 | 12.516312000 | 19.279224000 | 26.335481000 |
| 1 | 12.074466000 | 20.913359000 | 25.806404000 |
| 7 | 8.712569000  | 16.256363000 | 23.305088000 |
| 6 | 8.833881000  | 14.829610000 | 23.042894000 |
| 6 | 7.522757000  | 14.251050000 | 22.495602000 |
| 8 | 7.238651000  | 14.949132000 | 21.293312000 |
| 6 | 6.370344000  | 14.331651000 | 23.503031000 |
| 1 | 8.134949000  | 16.786754000 | 22.664576000 |
| 1 | 9.123026000  | 14.344826000 | 23.978985000 |
| 1 | 7.715770000  | 13.185787000 | 22.273044000 |
| 1 | 6.285832000  | 14.767238000 | 21.011968000 |
| 1 | 5.443344000  | 13.987395000 | 23.037473000 |
| 1 | 6.217917000  | 15.364540000 | 23.835218000 |
| 1 | 6.585171000  | 13.714258000 | 24.384766000 |
| 6 | 1.912136000  | 14.227918000 | 21.216099000 |
| 6 | 0.397245000  | 14.106061000 | 21.184308000 |
| 8 | -0.193233000 | 13.089490000 | 20.841235000 |
| 6 | 2.462275000  | 14.692885000 | 19.855016000 |
| 6 | 3.999122000  | 14.891444000 | 19.806838000 |
| 8 | 4.646336000  | 14.559957000 | 20.849721000 |
| 8 | 4.469106000  | 15.379639000 | 18.753010000 |
| 1 | 2.236986000  | 14.924662000 | 21.997595000 |
| 1 | 2.184659000  | 13.970787000 | 19.077449000 |
| 1 | 2.003682000  | 15.644502000 | 19.555160000 |
| 7 | -0.289391000 | 15.253090000 | 21.567399000 |
| 6 | -1.708774000 | 15.456449000 | 21.240837000 |
| 6 | -2.634058000 | 15.075782000 | 22.415622000 |
| 8 | -2.077355000 | 15.589237000 | 23.643704000 |
| 6 | -2.906537000 | 13.578928000 | 22.547641000 |
| 1 | 0.271901000  | 16.095170000 | 21.596712000 |
| 1 | -1.971976000 | 14.883001000 | 20.348425000 |
| 1 | -3.579933000 | 15.609370000 | 22.276802000 |
| 1 | -1.124716000 | 15.382414000 | 23.574186000 |
| 1 | -3.536498000 | 13.391312000 | 23.424497000 |
| 1 | -1.975534000 | 13.013136000 | 22.643177000 |
| 1 | -3.423570000 | 13.207700000 | 21.655476000 |
| 6 | -2.907391000 | 21.763297000 | 22.556979000 |
| 6 | -2.106083000 | 23.048224000 | 22.296224000 |
| 8 | -0.883730000 | 23.096743000 | 22.485035000 |
| 6 | -2.126400000 | 20.765045000 | 23.409095000 |
| 6 | -2.461459000 | 19.303578000 | 23.134333000 |

|   |              |              |              |                    |               |              |              |
|---|--------------|--------------|--------------|--------------------|---------------|--------------|--------------|
| 8 | -2.901409000 | 18.903370000 | 22.047576000 | 1                  | -5.574444000  | 23.723141000 | 18.484309000 |
| 7 | -2.213113000 | 18.443722000 | 24.148163000 | 1                  | -6.303119000  | 22.131592000 | 18.242267000 |
| 1 | -3.877926000 | 22.008238000 | 23.004130000 | 1                  | -4.808615000  | 21.692654000 | 16.710742000 |
| 1 | -2.243600000 | 20.980581000 | 24.478381000 | 7                  | -5.809915000  | 25.710116000 | 16.518951000 |
| 1 | -1.060236000 | 20.910205000 | 23.186978000 | 6                  | -5.191697000  | 26.795547000 | 15.788475000 |
| 1 | -1.776790000 | 18.774538000 | 24.996099000 | 6                  | -3.746674000  | 26.582812000 | 15.322102000 |
| 1 | -2.241779000 | 17.431941000 | 23.972240000 | 8                  | -3.112440000  | 27.536199000 | 14.866608000 |
| 7 | -2.832931000 | 24.081243000 | 21.828796000 | 1                  | -5.579213000  | 25.708861000 | 17.526951000 |
| 6 | -2.214098000 | 25.297428000 | 21.308127000 | 1                  | -5.774811000  | 27.004305000 | 14.885769000 |
| 6 | -3.289309000 | 26.332786000 | 20.941608000 | 7                  | -3.258840000  | 25.319771000 | 15.402370000 |
| 6 | -4.338463000 | 25.771170000 | 19.956533000 | 6                  | -2.010517000  | 24.923850000 | 14.763808000 |
| 8 | -4.409418000 | 26.313818000 | 18.805935000 | 6                  | -2.243259000  | 24.348743000 | 13.347403000 |
| 8 | -5.042225000 | 24.809401000 | 20.355854000 | 8                  | -1.302677000  | 24.268238000 | 12.555856000 |
| 1 | -3.806877000 | 23.963785000 | 21.529986000 | 6                  | -1.193283000  | 24.025194000 | 15.738319000 |
| 1 | -1.607001000 | 25.065103000 | 20.422491000 | 8                  | -0.571455000  | 24.832599000 | 16.729201000 |
| 1 | -2.796821000 | 27.208240000 | 20.510259000 | 6                  | -0.090758000  | 23.203699000 | 15.079759000 |
| 1 | -3.815830000 | 26.642460000 | 21.854045000 | 1                  | -3.785277000  | 24.614752000 | 15.910648000 |
| 6 | -2.612753000 | 20.340046000 | 18.022662000 | 1                  | -1.427295000  | 25.832593000 | 14.596522000 |
| 6 | -3.954859000 | 19.692135000 | 18.306832000 | 1                  | -1.909525000  | 23.330766000 | 16.210960000 |
| 8 | -4.856335000 | 19.715763000 | 17.424032000 | 1                  | -1.186449000  | 25.521653000 | 17.091204000 |
| 6 | -1.412196000 | 19.964038000 | 18.909219000 | 1                  | 0.483012000   | 22.701035000 | 15.864468000 |
| 6 | -0.233041000 | 20.928820000 | 18.650875000 | 1                  | 0.581260000   | 23.842521000 | 14.499813000 |
| 6 | -0.998257000 | 18.496680000 | 18.696058000 | 1                  | -0.500568000  | 22.444473000 | 14.408801000 |
| 6 | 0.769063000  | 20.968316000 | 19.809674000 | 7                  | -3.514450000  | 23.970501000 | 13.042664000 |
| 1 | -2.393436000 | 20.121431000 | 16.969887000 | 6                  | -3.919604000  | 23.606280000 | 11.690927000 |
| 1 | -1.701745000 | 20.099235000 | 19.961779000 | 6                  | -4.502699000  | 22.192965000 | 11.555740000 |
| 1 | 0.274106000  | 20.629398000 | 17.724386000 | 6                  | -3.552719000  | 21.013279000 | 11.697659000 |
| 1 | -0.617996000 | 21.945128000 | 18.489462000 | 6                  | -4.105050000  | 19.721107000 | 11.703105000 |
| 1 | -0.214589000 | 18.204963000 | 19.404889000 | 6                  | -2.161089000  | 21.141290000 | 11.792626000 |
| 1 | -0.586117000 | 18.360328000 | 17.689772000 | 6                  | -3.293866000  | 18.590355000 | 11.797382000 |
| 1 | -1.839252000 | 17.806309000 | 18.828829000 | 6                  | -1.348146000  | 20.006400000 | 11.896214000 |
| 1 | 1.617450000  | 21.617689000 | 19.571206000 | 6                  | -1.906375000  | 18.729040000 | 11.896927000 |
| 1 | 0.302759000  | 21.367523000 | 20.718660000 | 1                  | -4.258778000  | 24.176736000 | 13.701569000 |
| 1 | 1.167162000  | 19.972341000 | 20.034295000 | 1                  | -3.045307000  | 23.741615000 | 11.050152000 |
| 7 | -4.168185000 | 19.161927000 | 19.521120000 | 1                  | -5.329380000  | 22.071349000 | 12.268179000 |
| 6 | -5.320702000 | 18.335601000 | 19.910970000 | 1                  | -4.973544000  | 22.139576000 | 10.561741000 |
| 6 | -5.301023000 | 17.034463000 | 19.059138000 | 1                  | -5.186231000  | 19.613539000 | 11.651371000 |
| 8 | -4.342802000 | 16.271070000 | 19.120501000 | 1                  | -1.696988000  | 22.123108000 | 11.807057000 |
| 6 | -6.669606000 | 19.094455000 | 20.001601000 | 1                  | -3.744743000  | 17.600156000 | 11.800258000 |
| 8 | -7.226656000 | 19.412231000 | 18.717854000 | 1                  | -0.271787000  | 20.129215000 | 11.986454000 |
| 6 | -6.580713000 | 20.339603000 | 20.883431000 | 1                  | -1.270545000  | 17.851820000 | 11.984928000 |
| 1 | -3.423893000 | 19.180767000 | 20.215697000 | 1                  | 7.838765000   | 25.537933000 | 24.144533000 |
| 1 | -5.074394000 | 18.013249000 | 20.926621000 | 1                  | 5.270290000   | 24.771935000 | 24.560410000 |
| 1 | -7.383368000 | 18.393784000 | 20.455026000 | 1                  | 10.054274000  | 27.694251000 | 17.391455000 |
| 1 | -6.474531000 | 19.725407000 | 18.161204000 | 1                  | 10.584693000  | 27.241314000 | 20.013204000 |
| 1 | -7.565918000 | 20.810672000 | 20.943661000 | 1                  | 3.257108000   | 26.231828000 | 14.736412000 |
| 1 | -5.879739000 | 21.071124000 | 20.470118000 | 1                  | 5.807809000   | 27.062830000 | 14.311039000 |
| 1 | -6.245973000 | 20.081241000 | 21.895258000 | 1                  | 1.006499000   | 24.191426000 | 21.484456000 |
| 7 | -6.387467000 | 16.832331000 | 18.263814000 | 1                  | 0.517122000   | 24.594800000 | 18.834262000 |
| 6 | -6.417038000 | 15.829010000 | 17.218784000 | 1                  | 8.673901000   | 18.792350000 | 23.540371000 |
| 6 | -6.654891000 | 16.411293000 | 15.816445000 | 1                  | 9.631518000   | 14.648004000 | 22.308077000 |
| 8 | -7.156958000 | 15.723636000 | 14.935441000 | 1                  | 2.328563000   | 13.248494000 | 21.461730000 |
| 1 | -7.050710000 | 17.605428000 | 18.219315000 | 1                  | -1.847947000  | 16.517433000 | 21.023879000 |
| 1 | -5.456275000 | 15.303388000 | 17.238756000 | 1                  | -3.125605000  | 21.306275000 | 21.584702000 |
| 7 | -6.287516000 | 17.702900000 | 15.647198000 | 1                  | -1.529163000  | 25.701917000 | 22.061075000 |
| 6 | -6.370789000 | 18.373531000 | 14.353794000 | 1                  | -4.685791000  | 24.319727000 | 11.359196000 |
| 6 | -7.309290000 | 19.584686000 | 14.285189000 | 1                  | -2.803316000  | 21.421472000 | 18.062794000 |
| 8 | -7.246194000 | 20.370234000 | 13.338749000 | 1                  | 12.757013000  | 21.432318000 | 16.146733000 |
| 1 | -5.727663000 | 18.183434000 | 16.360562000 | 1                  | -5.201195000  | 27.687846000 | 16.418141000 |
| 1 | -5.384767000 | 18.714542000 | 14.024754000 | 1                  | -10.128347000 | 20.447669000 | 15.714427000 |
| 1 | -6.727928000 | 17.629913000 | 13.634387000 | 8                  | -1.940899000  | 26.984039000 | 17.796845000 |
| 7 | -8.221926000 | 19.696925000 | 15.285707000 | 1                  | -2.102646000  | 27.528430000 | 17.008034000 |
| 6 | -9.158960000 | 20.807044000 | 15.361338000 | 1                  | -2.843954000  | 26.786105000 | 18.160064000 |
| 6 | -8.701227000 | 21.905518000 | 16.337071000 | 1                  | -7.205522000  | 15.086860000 | 17.384282000 |
| 8 | -9.312084000 | 22.131801000 | 17.377564000 | 6                  | 5.897474000   | 17.745062000 | 20.362748000 |
| 1 | -8.123158000 | 19.091369000 | 16.090119000 | 8                  | 5.946036000   | 24.115974000 | 19.236451000 |
| 1 | -9.261647000 | 21.204214000 | 14.347333000 | 6                  | 12.102699000  | 24.021589000 | 19.221788000 |
| 7 | -7.562240000 | 22.548644000 | 15.965519000 | 1                  | 12.769169000  | 23.714633000 | 20.033166000 |
| 6 | -6.959718000 | 23.576692000 | 16.796468000 | 1                  | 12.195385000  | 25.107474000 | 19.110250000 |
| 6 | -6.360364000 | 24.653881000 | 15.880808000 | 1                  | 11.067990000  | 23.789729000 | 19.489633000 |
| 8 | -6.377982000 | 24.534442000 | 14.647570000 | 1                  | 3.929865000   | 27.920168000 | 20.671726000 |
| 6 | -5.873886000 | 22.996149000 | 17.723182000 |                    |               |              |              |
| 8 | -4.709723000 | 22.623792000 | 16.981083000 |                    |               |              |              |
| 1 | -7.220204000 | 22.475958000 | 15.012615000 |                    |               |              |              |
| 1 | -7.747451000 | 24.011142000 | 17.422279000 |                    |               |              |              |
|   |              |              |              | TS14 <sub>HA</sub> |               |              |              |
|   |              |              |              | 6                  | 2.610405000   | 25.668942000 | 17.298244000 |



|    |              |              |              |   |              |              |              |
|----|--------------|--------------|--------------|---|--------------|--------------|--------------|
| 6  | 7.166307000  | 27.057609000 | 16.399126000 | 1 | 12.231222000 | 25.698641000 | 15.508798000 |
| 6  | 8.423152000  | 25.885762000 | 20.921478000 | 1 | 10.941882000 | 24.728959000 | 16.224012000 |
| 6  | 3.842164000  | 24.602674000 | 21.849443000 | 1 | 11.859511000 | 24.761095000 | 12.587642000 |
| 6  | 3.744468000  | 26.171916000 | 16.667604000 | 1 | 12.911910000 | 23.333297000 | 12.604066000 |
| 6  | 3.781229000  | 26.625762000 | 15.298899000 | 1 | 13.455084000 | 24.844773000 | 13.353102000 |
| 6  | 5.061633000  | 27.015438000 | 15.049086000 | 6 | 8.926507000  | 18.559054000 | 24.473258000 |
| 6  | 5.809869000  | 26.801828000 | 16.264237000 | 6 | 9.251963000  | 17.063146000 | 24.379063000 |
| 6  | 7.919983000  | 26.848444000 | 17.549868000 | 8 | 9.947923000  | 16.490558000 | 25.218185000 |
| 6  | 9.325913000  | 27.145093000 | 17.678900000 | 6 | 10.022134000 | 19.353226000 | 25.195925000 |
| 6  | 9.683455000  | 26.806052000 | 18.951020000 | 6 | 11.355181000 | 19.486079000 | 24.432063000 |
| 6  | 8.494123000  | 26.305304000 | 19.596581000 | 6 | 11.227050000 | 20.345295000 | 23.164198000 |
| 6  | 7.273694000  | 25.458759000 | 21.571681000 | 6 | 12.440777000 | 20.056691000 | 25.357615000 |
| 6  | 7.232479000  | 25.032041000 | 22.948597000 | 1 | 7.988703000  | 18.646058000 | 25.040441000 |
| 6  | 5.943525000  | 24.681225000 | 23.214757000 | 1 | 10.213988000 | 18.850790000 | 26.150890000 |
| 6  | 5.195906000  | 24.889366000 | 21.999387000 | 1 | 9.640902000  | 20.358604000 | 25.427245000 |
| 6  | 3.123622000  | 24.745010000 | 20.675355000 | 1 | 11.667979000 | 18.474439000 | 24.137996000 |
| 6  | 1.713741000  | 24.444940000 | 20.538586000 | 1 | 12.188537000 | 20.412908000 | 22.639485000 |
| 6  | 1.377783000  | 24.738186000 | 19.254844000 | 1 | 10.495577000 | 19.944834000 | 22.454406000 |
| 6  | 2.576740000  | 25.221868000 | 18.607783000 | 1 | 10.915003000 | 21.368013000 | 23.416713000 |
| 7  | 4.981736000  | 26.294464000 | 17.239229000 | 1 | 13.405160000 | 20.134807000 | 24.840219000 |
| 7  | 7.439433000  | 26.333526000 | 18.723981000 | 1 | 12.581333000 | 19.422930000 | 26.241451000 |
| 7  | 6.016168000  | 25.375873000 | 21.018819000 | 1 | 12.170290000 | 21.063100000 | 25.706247000 |
| 7  | 3.636422000  | 25.204100000 | 19.483689000 | 7 | 8.687656000  | 16.423732000 | 23.319752000 |
| 26 | 5.505170000  | 25.730504000 | 19.104635000 | 6 | 8.781800000  | 14.987335000 | 23.099447000 |
| 1  | 1.678144000  | 25.626959000 | 16.741747000 | 6 | 7.462928000  | 14.414978000 | 22.565370000 |
| 1  | 7.682105000  | 27.463428000 | 15.533693000 | 8 | 7.202180000  | 15.066582000 | 21.331993000 |
| 1  | 9.341887000  | 25.905487000 | 21.500267000 | 6 | 6.303520000  | 14.560140000 | 23.557472000 |
| 1  | 3.309805000  | 24.223819000 | 22.716279000 | 1 | 8.114069000  | 16.947549000 | 22.670539000 |
| 6  | 6.786688000  | 19.716877000 | 19.425224000 | 1 | 9.059131000  | 14.525308000 | 24.050541000 |
| 6  | 7.109969000  | 20.972808000 | 18.885577000 | 1 | 7.635783000  | 13.337889000 | 22.388614000 |
| 6  | 9.178292000  | 19.172253000 | 19.684810000 | 1 | 6.250775000  | 14.881744000 | 21.043900000 |
| 6  | 7.829113000  | 18.828651000 | 19.827100000 | 1 | 5.375031000  | 14.212422000 | 23.097361000 |
| 6  | 5.533204000  | 19.066985000 | 19.716823000 | 1 | 6.167219000  | 15.608922000 | 23.843615000 |
| 6  | 8.455809000  | 21.294908000 | 18.745739000 | 1 | 6.498802000  | 13.977529000 | 24.466941000 |
| 6  | 9.485828000  | 20.413346000 | 19.138435000 | 6 | 1.901553000  | 14.227752000 | 21.188341000 |
| 7  | 7.228194000  | 17.712292000 | 20.368116000 | 6 | 0.388489000  | 14.087536000 | 21.149435000 |
| 1  | 7.629570000  | 16.796961000 | 20.571871000 | 8 | -0.188771000 | 13.066998000 | 20.795668000 |
| 6  | 4.162410000  | 19.584301000 | 19.389383000 | 6 | 2.450319000  | 14.721813000 | 19.837203000 |
| 6  | 3.749274000  | 19.377095000 | 17.917545000 | 6 | 3.982528000  | 14.955602000 | 19.802143000 |
| 7  | 3.397767000  | 18.000856000 | 17.597471000 | 8 | 4.622328000  | 14.668158000 | 20.862990000 |
| 6  | 2.371685000  | 17.717930000 | 16.747762000 | 8 | 4.454486000  | 15.427256000 | 18.742187000 |
| 6  | 2.194997000  | 16.242261000 | 16.414876000 | 1 | 2.215678000  | 14.916273000 | 21.981173000 |
| 8  | 1.633087000  | 18.578614000 | 16.259029000 | 1 | 2.193151000  | 14.005561000 | 19.047644000 |
| 1  | 3.946948000  | 17.223597000 | 17.972779000 | 1 | 1.973128000  | 15.667620000 | 19.547310000 |
| 8  | 8.880568000  | 22.516736000 | 18.226743000 | 7 | -0.312165000 | 15.223203000 | 21.539514000 |
| 6  | 8.005575000  | 23.258578000 | 17.452156000 | 6 | -1.732667000 | 15.415118000 | 21.211431000 |
| 1  | 5.224433000  | 17.055229000 | 20.626067000 | 6 | -2.655733000 | 15.015004000 | 22.381868000 |
| 1  | 6.334671000  | 21.687763000 | 18.631589000 | 8 | -2.101734000 | 15.516736000 | 23.616210000 |
| 1  | 9.969835000  | 18.491172000 | 19.986235000 | 6 | -2.918343000 | 13.514835000 | 22.495191000 |
| 1  | 10.519008000 | 20.716897000 | 19.005052000 | 1 | 0.239833000  | 16.070737000 | 21.582917000 |
| 1  | 3.414323000  | 19.110755000 | 20.035998000 | 1 | -1.987989000 | 14.845608000 | 20.314231000 |
| 1  | 4.114647000  | 20.662089000 | 19.596064000 | 1 | -3.605067000 | 15.544023000 | 22.250046000 |
| 1  | 4.565917000  | 19.722660000 | 17.265852000 | 1 | -1.148780000 | 15.311503000 | 23.545460000 |
| 1  | 2.872379000  | 19.98239000  | 17.680600000 | 1 | -3.544592000 | 13.311404000 | 23.371167000 |
| 1  | 1.170000000  | 15.942291000 | 16.659062000 | 1 | -1.983281000 | 12.954003000 | 22.580241000 |
| 1  | 2.905444000  | 15.602801000 | 16.944681000 | 1 | -3.435646000 | 13.152412000 | 21.599554000 |
| 1  | 2.316110000  | 16.118030000 | 15.332594000 | 6 | -2.874762000 | 21.687578000 | 22.512082000 |
| 1  | 8.541571000  | 24.104903000 | 17.025699000 | 6 | -2.073406000 | 22.963700000 | 22.210620000 |
| 1  | 6.972372000  | 23.823427000 | 18.162870000 | 8 | -0.844119000 | 23.001564000 | 22.348877000 |
| 1  | 7.446922000  | 22.655917000 | 16.728905000 | 6 | -2.071802000 | 20.690533000 | 23.345183000 |
| 16 | 5.173946000  | 28.033486000 | 19.618607000 | 6 | -2.423357000 | 19.230601000 | 23.086412000 |
| 6  | 12.776292000 | 23.238097000 | 18.626675000 | 8 | -2.868710000 | 18.826097000 | 22.003156000 |
| 8  | 14.000501000 | 23.200651000 | 18.518005000 | 7 | -2.183506000 | 18.376190000 | 24.106545000 |
| 7  | 11.938111000 | 22.761623000 | 17.660719000 | 1 | -3.827224000 | 21.943747000 | 22.990734000 |
| 6  | 12.454516000 | 22.069905000 | 16.484098000 | 1 | -2.153545000 | 20.912717000 | 24.416331000 |
| 6  | 12.999947000 | 22.967702000 | 15.358410000 | 1 | -1.012952000 | 20.829205000 | 23.086594000 |
| 6  | 11.968165000 | 23.766663000 | 14.534523000 | 1 | -1.747992000 | 18.708562000 | 24.954171000 |
| 6  | 11.420053000 | 24.994611000 | 15.278286000 | 1 | -2.232551000 | 17.363433000 | 23.940790000 |
| 6  | 12.581628000 | 24.198438000 | 13.192129000 | 7 | -2.811761000 | 23.998478000 | 21.766719000 |
| 1  | 10.937598000 | 22.759438000 | 17.830658000 | 6 | -2.213660000 | 25.211148000 | 21.215321000 |
| 1  | 11.647145000 | 21.435118000 | 16.100777000 | 6 | -3.297392000 | 26.266833000 | 20.943768000 |
| 1  | 13.543422000 | 22.299534000 | 14.673788000 | 6 | -4.416020000 | 25.738003000 | 20.018544000 |
| 1  | 13.749712000 | 23.644090000 | 15.787647000 | 8 | -4.564871000 | 26.312680000 | 18.891126000 |
| 1  | 11.122305000 | 23.096735000 | 14.312306000 | 8 | -5.095717000 | 24.766997000 | 20.437535000 |
| 1  | 10.682028000 | 25.524840000 | 14.663280000 | 1 | -3.801369000 | 23.889892000 | 21.521262000 |



|    |              |              |              |   |              |              |              |
|----|--------------|--------------|--------------|---|--------------|--------------|--------------|
| 6  | 4.881391000  | 25.150069000 | 22.227777000 | 1 | 10.015175000 | 20.058038000 | 25.572735000 |
| 6  | 2.804395000  | 25.014715000 | 20.874903000 | 1 | 11.917061000 | 18.096772000 | 24.210045000 |
| 6  | 1.399055000  | 24.689050000 | 20.722104000 | 1 | 12.511519000 | 20.033948000 | 22.734167000 |
| 6  | 1.073077000  | 24.998639000 | 19.439181000 | 1 | 10.796473000 | 19.647656000 | 22.567161000 |
| 6  | 2.277764000  | 25.510301000 | 18.819754000 | 1 | 11.295886000 | 21.034822000 | 23.543743000 |
| 7  | 4.734483000  | 26.522792000 | 17.464897000 | 1 | 13.747435000 | 19.654592000 | 24.908927000 |
| 7  | 7.158564000  | 26.568171000 | 18.988753000 | 1 | 12.909551000 | 18.965320000 | 26.312956000 |
| 7  | 5.717804000  | 25.635938000 | 21.265224000 | 1 | 12.575452000 | 20.632175000 | 25.807505000 |
| 7  | 3.318093000  | 25.512045000 | 19.703944000 | 7 | 8.828190000  | 16.253137000 | 23.351604000 |
| 26 | 5.223303000  | 26.010844000 | 19.351007000 | 6 | 8.860183000  | 14.823841000 | 23.072335000 |
| 1  | 1.429459000  | 25.891074000 | 16.920393000 | 6 | 7.512206000  | 14.316619000 | 22.545440000 |
| 1  | 7.491863000  | 27.510233000 | 15.748301000 | 8 | 7.260152000  | 14.999184000 | 21.327260000 |
| 1  | 8.994668000  | 26.309182000 | 21.830539000 | 6 | 6.372265000  | 14.486210000 | 23.555563000 |
| 1  | 2.991056000  | 24.457329000 | 22.904335000 | 1 | 8.279766000  | 16.831267000 | 22.727052000 |
| 6  | 6.984501000  | 19.743124000 | 19.638538000 | 1 | 9.139543000  | 14.315867000 | 23.999040000 |
| 6  | 7.389654000  | 20.989409000 | 19.128218000 | 1 | 7.640835000  | 13.237290000 | 22.345853000 |
| 6  | 9.333925000  | 19.013120000 | 19.819411000 | 1 | 6.296704000  | 14.857773000 | 21.049428000 |
| 6  | 7.967154000  | 18.770189000 | 19.990900000 | 1 | 5.426162000  | 14.178240000 | 23.103022000 |
| 6  | 5.693216000  | 19.176223000 | 19.936390000 | 1 | 6.276874000  | 15.534359000 | 23.859964000 |
| 6  | 8.751053000  | 21.206617000 | 18.957378000 | 1 | 6.558939000  | 13.882762000 | 24.453172000 |
| 6  | 9.720976000  | 20.241078000 | 19.292603000 | 6 | 1.945859000  | 14.274911000 | 21.146411000 |
| 7  | 7.298974000  | 17.684632000 | 20.517612000 | 6 | 0.433443000  | 14.139641000 | 21.082762000 |
| 1  | 7.638351000  | 16.733016000 | 20.672095000 | 8 | -0.142233000 | 13.131447000 | 20.693221000 |
| 6  | 4.355175000  | 19.790161000 | 19.636516000 | 6 | 2.511466000  | 14.848379000 | 19.834143000 |
| 6  | 3.923621000  | 19.647797000 | 18.162582000 | 6 | 4.045842000  | 15.070733000 | 19.830186000 |
| 7  | 3.539827000  | 18.291466000 | 17.794929000 | 8 | 4.671379000  | 14.699877000 | 20.873728000 |
| 6  | 2.527333000  | 18.062926000 | 16.912894000 | 8 | 4.532856000  | 15.612376000 | 18.811749000 |
| 6  | 2.327237000  | 16.605897000 | 16.517482000 | 1 | 2.249867000  | 14.915361000 | 21.982481000 |
| 8  | 1.816932000  | 18.957606000 | 16.443995000 | 1 | 2.258707000  | 14.184165000 | 18.998793000 |
| 1  | 4.075437000  | 17.490740000 | 18.137270000 | 1 | 2.044077000  | 15.813612000 | 19.597789000 |
| 8  | 9.266087000  | 22.412531000 | 18.464277000 | 7 | -0.269366000 | 15.266825000 | 21.494692000 |
| 6  | 8.443843000  | 23.288845000 | 17.828608000 | 6 | -1.682536000 | 15.473936000 | 21.144593000 |
| 1  | 5.259392000  | 17.162369000 | 20.789138000 | 6 | -2.628652000 | 15.047242000 | 22.286790000 |
| 1  | 6.659732000  | 21.762375000 | 18.909680000 | 8 | -2.094363000 | 15.512405000 | 23.543870000 |
| 1  | 10.078365000 | 18.266766000 | 20.083909000 | 6 | -2.900629000 | 13.546050000 | 22.354179000 |
| 1  | 10.770743000 | 20.474969000 | 19.144785000 | 1 | 0.285436000  | 16.110775000 | 21.565658000 |
| 1  | 3.582489000  | 19.346835000 | 20.276356000 | 1 | -1.923666000 | 14.930493000 | 20.227681000 |
| 1  | 4.375743000  | 20.863905000 | 19.867820000 | 1 | -3.572848000 | 15.585093000 | 22.153054000 |
| 1  | 4.741632000  | 19.999919000 | 17.516307000 | 1 | -1.139854000 | 15.311378000 | 23.480859000 |
| 1  | 3.059539000  | 20.283006000 | 17.957884000 | 1 | -3.542630000 | 13.321648000 | 23.213487000 |
| 1  | 1.292018000  | 16.317752000 | 16.731133000 | 1 | -1.969797000 | 12.978262000 | 22.439160000 |
| 1  | 3.015062000  | 15.930581000 | 17.032404000 | 1 | -3.404300000 | 13.211556000 | 21.440074000 |
| 1  | 2.465134000  | 16.523541000 | 15.433200000 | 6 | -3.037456000 | 21.676571000 | 22.579284000 |
| 1  | 8.937780000  | 24.213094000 | 17.558949000 | 6 | -2.284288000 | 22.991644000 | 22.325683000 |
| 1  | 6.528205000  | 24.180379000 | 18.961319000 | 8 | -1.060484000 | 23.076702000 | 22.489086000 |
| 1  | 7.602368000  | 22.899453000 | 17.266247000 | 6 | -2.208250000 | 20.690009000 | 23.399693000 |
| 16 | 4.838975000  | 28.367283000 | 19.808763000 | 6 | -2.500316000 | 19.224833000 | 23.099038000 |
| 6  | 13.046850000 | 23.289171000 | 18.054378000 | 8 | -2.908646000 | 18.832516000 | 21.996764000 |
| 8  | 14.252968000 | 23.330192000 | 17.817327000 | 7 | -2.250099000 | 18.354175000 | 24.102585000 |
| 7  | 12.195655000 | 22.449171000 | 17.399000000 | 1 | -4.006733000 | 21.881779000 | 23.048646000 |
| 6  | 12.683002000 | 21.493387000 | 16.410035000 | 1 | -2.313791000 | 20.882099000 | 24.474534000 |
| 6  | 13.015805000 | 22.074518000 | 15.023218000 | 1 | -1.151885000 | 20.874751000 | 23.160780000 |
| 6  | 11.830817000 | 22.429282000 | 14.101413000 | 1 | -1.847284000 | 18.680463000 | 24.968501000 |
| 6  | 11.026869000 | 23.650442000 | 14.575121000 | 1 | -2.263146000 | 17.344346000 | 23.912848000 |
| 6  | 12.334941000 | 22.656906000 | 12.666361000 | 7 | -3.055470000 | 24.008595000 | 21.894548000 |
| 1  | 11.221951000 | 22.417628000 | 17.680100000 | 6 | -2.490266000 | 25.255186000 | 21.385630000 |
| 1  | 11.928156000 | 20.703560000 | 16.319825000 | 6 | -3.605778000 | 26.266685000 | 21.077307000 |
| 1  | 13.628303000 | 21.317953000 | 14.510577000 | 6 | -4.664445000 | 25.701866000 | 20.104277000 |
| 1  | 13.663805000 | 22.948874000 | 15.163148000 | 8 | -4.796627000 | 26.284994000 | 18.979106000 |
| 1  | 11.150621000 | 21.563034000 | 14.081023000 | 8 | -5.316957000 | 24.698266000 | 20.487354000 |
| 1  | 10.229834000 | 23.889853000 | 13.860322000 | 1 | -4.031289000 | 23.864666000 | 21.614030000 |
| 1  | 11.675364000 | 24.532323000 | 14.662540000 | 1 | -1.904619000 | 25.061789000 | 20.476451000 |
| 1  | 10.559024000 | 23.485872000 | 15.549424000 | 1 | -3.151718000 | 27.169676000 | 20.660607000 |
| 1  | 11.505066000 | 22.879707000 | 11.984708000 | 1 | -4.116305000 | 26.533341000 | 22.012192000 |
| 1  | 12.860756000 | 21.774876000 | 12.280286000 | 6 | -2.661786000 | 20.417136000 | 18.016618000 |
| 1  | 13.033414000 | 23.503722000 | 12.628133000 | 6 | -3.977386000 | 19.705820000 | 18.276846000 |
| 6  | 9.184380000  | 18.328117000 | 24.585602000 | 8 | -4.878160000 | 19.717714000 | 17.393366000 |
| 6  | 9.432688000  | 16.822592000 | 24.428880000 | 6 | -1.437430000 | 20.033248000 | 18.868580000 |
| 8  | 10.107165000 | 16.184508000 | 25.237857000 | 6 | -0.288655000 | 21.042390000 | 18.641961000 |
| 6  | 10.335409000 | 19.039522000 | 25.308563000 | 6 | -0.986230000 | 18.590326000 | 18.578172000 |
| 6  | 11.660726000 | 19.118155000 | 24.524298000 | 6 | 0.741458000  | 21.044054000 | 19.776802000 |
| 6  | 11.555718000 | 20.002533000 | 23.272061000 | 1 | -2.447665000 | 20.265640000 | 16.951254000 |
| 6  | 12.788187000 | 19.618484000 | 25.440409000 | 1 | -1.715844000 | 20.107933000 | 19.930321000 |
| 1  | 8.266380000  | 18.440023000 | 25.180126000 | 1 | 0.208962000  | 20.811464000 | 17.691449000 |
| 1  | 10.514949000 | 18.501818000 | 26.246601000 | 1 | -0.704895000 | 22.055204000 | 18.549982000 |



|    |              |              |              |   |              |              |              |
|----|--------------|--------------|--------------|---|--------------|--------------|--------------|
| 6  | 7.008045000  | 19.767518000 | 19.607787000 | 1 | 9.134148000  | 14.313634000 | 23.999181000 |
| 6  | 7.406960000  | 21.017128000 | 19.100469000 | 1 | 7.634598000  | 13.251591000 | 22.324158000 |
| 6  | 9.363086000  | 19.059612000 | 19.805590000 | 1 | 6.296800000  | 14.891035000 | 21.052650000 |
| 6  | 7.997454000  | 18.803257000 | 19.965783000 | 1 | 5.424290000  | 14.189397000 | 23.099497000 |
| 6  | 5.720282000  | 19.189330000 | 19.898350000 | 1 | 6.281797000  | 15.529677000 | 23.877137000 |
| 6  | 8.766961000  | 21.247155000 | 18.938389000 | 1 | 6.557699000  | 13.867333000 | 24.442889000 |
| 6  | 9.743351000  | 20.291443000 | 19.281940000 | 6 | 1.949639000  | 14.282101000 | 21.151098000 |
| 7  | 7.335115000  | 17.711132000 | 20.486480000 | 6 | 0.437593000  | 14.141324000 | 21.089751000 |
| 1  | 7.682860000  | 16.765274000 | 20.650858000 | 8 | -0.134911000 | 13.130262000 | 20.702915000 |
| 6  | 4.378010000  | 19.793636000 | 19.597705000 | 6 | 2.511466000  | 14.848377000 | 19.834143000 |
| 6  | 3.943230000  | 19.644480000 | 18.125313000 | 6 | 4.043963000  | 15.082731000 | 19.828726000 |
| 7  | 3.552555000  | 18.288037000 | 17.766087000 | 8 | 4.672129000  | 14.726117000 | 20.875442000 |
| 6  | 2.534389000  | 18.059383000 | 16.890608000 | 8 | 4.527396000  | 15.618841000 | 18.805494000 |
| 6  | 2.322850000  | 16.600618000 | 16.507883000 | 1 | 2.252617000  | 14.929432000 | 21.982174000 |
| 8  | 1.827812000  | 18.955080000 | 16.417926000 | 1 | 2.263999000  | 14.175290000 | 19.004341000 |
| 1  | 4.081243000  | 17.485963000 | 18.116183000 | 1 | 2.036791000  | 15.807987000 | 19.589561000 |
| 8  | 9.268734000  | 22.459840000 | 18.445930000 | 7 | -0.268508000 | 15.266746000 | 21.500397000 |
| 6  | 8.450005000  | 23.281146000 | 17.731232000 | 6 | -1.682996000 | 15.468566000 | 21.152603000 |
| 1  | 5.298417000  | 17.171702000 | 20.748097000 | 6 | -2.625558000 | 15.041038000 | 22.297433000 |
| 1  | 6.675160000  | 21.787683000 | 18.879720000 | 8 | -2.090617000 | 15.510412000 | 23.552675000 |
| 1  | 10.112397000 | 18.320267000 | 20.076002000 | 6 | -2.892294000 | 13.539044000 | 22.368214000 |
| 1  | 10.792193000 | 20.534475000 | 19.142697000 | 1 | 0.283452000  | 16.112594000 | 21.570634000 |
| 1  | 3.608974000  | 19.348407000 | 20.240409000 | 1 | -1.923978000 | 14.922373000 | 20.237278000 |
| 1  | 4.392980000  | 20.867902000 | 19.827078000 | 1 | -3.571775000 | 15.575479000 | 22.164380000 |
| 1  | 4.761821000  | 19.989050000 | 17.475408000 | 1 | -1.135714000 | 15.311638000 | 23.488907000 |
| 1  | 3.081224000  | 20.281870000 | 17.918145000 | 1 | -3.531650000 | 13.314058000 | 23.229335000 |
| 1  | 1.286438000  | 16.321362000 | 16.727462000 | 1 | -1.959333000 | 12.974595000 | 22.452204000 |
| 1  | 3.007777000  | 15.924923000 | 17.026125000 | 1 | -3.396812000 | 13.201120000 | 21.455835000 |
| 1  | 2.456355000  | 16.508325000 | 15.423855000 | 6 | -3.031215000 | 21.669202000 | 22.557926000 |
| 1  | 8.937239000  | 24.203760000 | 17.440089000 | 6 | -2.267273000 | 22.975151000 | 22.289380000 |
| 1  | 6.625739000  | 24.284674000 | 18.733494000 | 8 | -1.041919000 | 23.049398000 | 22.446271000 |
| 1  | 7.693250000  | 22.818128000 | 17.103855000 | 6 | -2.208974000 | 20.686087000 | 23.389166000 |
| 16 | 4.775061000  | 28.184211000 | 20.059612000 | 6 | -2.499973000 | 19.219755000 | 23.094735000 |
| 6  | 13.051046000 | 23.368791000 | 18.053781000 | 8 | -2.906939000 | 18.821573000 | 21.993966000 |
| 8  | 14.256863000 | 23.417907000 | 17.816629000 | 7 | -2.250098000 | 18.354172000 | 24.102584000 |
| 7  | 12.209087000 | 22.508464000 | 17.412936000 | 1 | -3.998776000 | 21.887207000 | 23.024961000 |
| 6  | 12.706289000 | 21.541111000 | 16.440323000 | 1 | -2.321356000 | 20.883659000 | 24.462330000 |
| 6  | 13.032337000 | 22.101942000 | 15.043525000 | 1 | -1.150874000 | 20.868783000 | 23.155966000 |
| 6  | 11.842794000 | 22.430969000 | 14.118009000 | 1 | -1.847602000 | 18.684818000 | 24.967004000 |
| 6  | 11.026870000 | 23.650441000 | 14.575118000 | 1 | -2.261983000 | 17.343550000 | 23.917237000 |
| 6  | 12.342533000 | 22.642556000 | 12.679006000 | 7 | -3.031318000 | 23.994856000 | 21.853482000 |
| 1  | 11.235198000 | 22.473052000 | 17.692937000 | 6 | -2.461081000 | 25.235163000 | 21.334887000 |
| 1  | 11.959698000 | 20.741968000 | 16.364020000 | 6 | -3.571917000 | 26.257669000 | 21.046498000 |
| 1  | 13.650865000 | 21.342566000 | 14.542441000 | 6 | -4.648476000 | 25.703680000 | 20.086960000 |
| 1  | 13.672639000 | 22.984265000 | 15.168163000 | 8 | -4.787474000 | 26.286932000 | 18.962607000 |
| 1  | 11.171558000 | 21.557483000 | 14.111336000 | 8 | -5.306469000 | 24.706608000 | 20.477937000 |
| 1  | 10.225382000 | 23.870244000 | 13.858988000 | 1 | -4.011787000 | 23.859111000 | 21.585660000 |
| 1  | 11.665874000 | 24.540566000 | 14.647221000 | 1 | -1.893840000 | 25.036222000 | 20.415211000 |
| 1  | 10.564029000 | 23.495421000 | 15.553107000 | 1 | -3.116013000 | 27.157830000 | 20.625920000 |
| 1  | 11.509301000 | 22.846404000 | 11.995502000 | 1 | -4.066265000 | 26.525344000 | 21.989723000 |
| 1  | 12.877068000 | 21.760506000 | 12.305159000 | 6 | -2.661374000 | 20.403619000 | 18.015695000 |
| 1  | 13.031857000 | 23.496104000 | 12.627012000 | 6 | -3.979157000 | 19.696654000 | 18.276681000 |
| 6  | 9.184379000  | 18.328116000 | 24.585602000 | 8 | -4.881175000 | 19.711835000 | 17.394537000 |
| 6  | 9.438375000  | 16.823923000 | 24.427070000 | 6 | -1.435329000 | 20.003205000 | 18.857711000 |
| 8  | 10.119191000 | 16.187221000 | 25.231816000 | 6 | -0.281319000 | 21.007235000 | 18.636983000 |
| 6  | 10.330248000 | 19.042867000 | 25.313369000 | 6 | -0.995330000 | 18.560362000 | 18.550379000 |
| 6  | 11.657329000 | 19.129392000 | 24.532902000 | 6 | 0.757527000  | 20.983451000 | 19.763359000 |
| 6  | 11.552324000 | 20.018162000 | 23.283771000 | 1 | -2.453685000 | 20.261166000 | 16.947884000 |
| 6  | 12.780461000 | 19.630537000 | 25.453871000 | 1 | -1.707961000 | 20.068494000 | 19.921501000 |
| 1  | 8.263810000  | 18.436057000 | 25.176923000 | 1 | 0.207263000  | 20.787584000 | 17.679107000 |
| 1  | 10.509733000 | 18.503621000 | 26.250545000 | 1 | -0.691049000 | 22.024146000 | 18.564134000 |
| 1  | 10.004766000 | 20.059261000 | 25.579214000 | 1 | -0.192649000 | 18.244213000 | 19.226233000 |
| 1  | 11.918317000 | 18.110152000 | 24.215595000 | 1 | -0.598235000 | 18.494175000 | 17.530971000 |
| 1  | 12.509159000 | 20.054442000 | 22.748003000 | 1 | -1.818855000 | 17.844577000 | 18.655618000 |
| 1  | 10.795606000 | 19.663715000 | 22.575933000 | 1 | 1.578593000  | 21.674919000 | 19.548600000 |
| 1  | 11.288778000 | 21.048650000 | 23.558564000 | 1 | 0.310540000  | 21.295516000 | 20.715421000 |
| 1  | 13.740925000 | 19.672511000 | 24.925005000 | 1 | 1.191378000  | 19.985280000 | 19.891529000 |
| 1  | 12.902157000 | 18.974391000 | 26.324137000 | 7 | -4.172925000 | 19.122968000 | 19.474740000 |
| 1  | 12.562800000 | 20.641930000 | 25.824377000 | 6 | -5.292934000 | 18.240623000 | 19.836638000 |
| 7  | 8.830107000  | 16.253714000 | 23.352721000 | 6 | -5.223622000 | 16.968450000 | 18.944918000 |
| 6  | 8.859771000  | 14.824881000 | 23.072732000 | 8 | -4.234940000 | 16.243176000 | 18.979567000 |
| 6  | 7.510062000  | 14.328077000 | 22.540708000 | 6 | -6.670809000 | 18.941988000 | 19.949742000 |
| 8  | 7.258705000  | 15.032071000 | 21.334750000 | 8 | -7.240173000 | 19.278240000 | 18.676042000 |
| 6  | 6.372268000  | 14.486217000 | 23.555558000 | 6 | -6.631652000 | 20.159565000 | 20.872513000 |
| 1  | 8.273778000  | 16.828971000 | 22.732666000 | 1 | -3.428951000 | 19.145499000 | 20.169735000 |



|   |              |              |              |    |               |              |              |
|---|--------------|--------------|--------------|----|---------------|--------------|--------------|
| 1 | -5.034509000 | 17.896679000 | 20.842162000 | 1  | 5.141347000   | 24.648937000 | 24.400859000 |
| 1 | -7.355878000 | 18.198872000 | 20.379237000 | 1  | 9.702534000   | 27.735235000 | 17.176497000 |
| 1 | -6.501043000 | 19.635951000 | 18.128921000 | 1  | 10.335809000  | 27.215194000 | 19.764510000 |
| 1 | -7.634138000 | 20.590846000 | 20.944621000 | 1  | 2.735473000   | 26.755092000 | 14.806275000 |
| 1 | -5.957216000 | 20.929954000 | 20.486706000 | 1  | 5.304108000   | 27.497672000 | 14.325303000 |
| 1 | -6.290561000 | 19.880073000 | 21.876586000 | 1  | 0.799219000   | 24.184795000 | 21.465511000 |
| 7 | -6.304236000 | 16.745283000 | 18.147283000 | 1  | 0.181519000   | 24.792247000 | 18.880815000 |
| 6 | -6.295122000 | 15.772336000 | 17.073378000 | 1  | 8.972953000   | 18.787007000 | 23.612513000 |
| 6 | -6.555799000 | 16.385686000 | 15.688615000 | 1  | 9.633299000   | 14.603581000 | 22.32376000  |
| 8 | -7.029950000 | 15.705497000 | 14.786619000 | 1  | 2.377250000   | 13.294392000 | 21.336731000 |
| 1 | -6.997801000 | 17.492283000 | 18.126149000 | 1  | -1.827826000  | 16.534823000 | 20.967990000 |
| 1 | -5.314486000 | 15.284510000 | 17.079102000 | 1  | -3.255845000  | 21.211693000 | 21.587331000 |
| 7 | -6.241456000 | 17.712814000 | 15.559342000 | 1  | -1.748132000  | 25.633893000 | 22.06154000  |
| 6 | -6.357400000 | 18.403784000 | 14.288549000 | 1  | -5.055449000  | 24.505140000 | 11.460185000 |
| 6 | -7.357302000 | 19.566463000 | 14.261059000 | 1  | -2.880807000  | 21.474504000 | 18.130643000 |
| 8 | -7.325315000 | 20.396569000 | 13.351774000 | 1  | 13.622898000  | 21.103309000 | 16.851294000 |
| 1 | -5.701178000 | 18.177352000 | 16.286611000 | 1  | -5.737582000  | 27.690948000 | 16.651437000 |
| 1 | -5.390285000 | 18.806774000 | 13.974306000 | 1  | -10.227454000 | 20.222939000 | 15.705986000 |
| 1 | -6.675662000 | 17.667703000 | 13.543518000 | 8  | -2.415847000  | 27.195348000 | 17.922436000 |
| 7 | -8.286705000 | 19.584328000 | 15.252256000 | 1  | -2.638680000  | 27.733090000 | 17.143906000 |
| 6 | -9.276892000 | 20.643424000 | 15.368935000 | 1  | -3.291466000  | 26.916751000 | 18.301288000 |
| 6 | -8.875203000 | 21.727537000 | 16.384889000 | 1  | -0.054016000  | 14.995581000 | 17.206988000 |
| 8 | -9.514182000 | 21.904441000 | 17.417734000 | 6  | 5.975929000   | 17.945703000 | 20.420837000 |
| 1 | -8.159277000 | 18.954478000 | 16.033637000 | 8  | 5.658090000   | 24.343310000 | 18.880765000 |
| 1 | -9.399322000 | 21.074152000 | 14.370870000 | 6  | 12.387082000  | 24.289715000 | 19.069978000 |
| 7 | -7.751019000 | 22.417579000 | 16.052467000 | 1  | 13.030310000  | 24.358236000 | 19.951617000 |
| 6 | -7.210029000 | 23.456998000 | 16.911369000 | 1  | 12.304408000  | 25.295442000 | 18.641462000 |
| 6 | -6.699551000 | 24.603659000 | 16.026793000 | 1  | 11.388051000  | 23.958750000 | 19.367443000 |
| 8 | -6.725305000 | 24.524180000 | 14.790629000 | 1  | 4.409056000   | 28.693556000 | 18.862548000 |
| 6 | -6.080009000 | 22.922052000 | 17.812602000 |    |               |              |              |
| 8 | -4.899705000 | 22.642163000 | 17.055699000 |    |               |              |              |
| 1 | -7.401632000 | 22.389042000 | 15.099696000 |    |               |              |              |
| 1 | -8.020312000 | 23.814826000 | 17.556673000 |    |               |              |              |
| 1 | -5.820548000 | 23.646143000 | 18.591073000 |    |               |              |              |
| 1 | -6.451423000 | 22.019399000 | 18.310918000 |    |               |              |              |
| 1 | -4.943276000 | 21.715034000 | 16.758595000 |    |               |              |              |
| 7 | -6.218128000 | 25.676441000 | 16.693252000 |    |               |              |              |
| 6 | -5.687584000 | 26.824078000 | 15.988975000 |    |               |              |              |
| 6 | -4.243657000 | 26.719231000 | 15.485041000 |    |               |              |              |
| 8 | -3.681573000 | 27.723163000 | 15.042937000 |    |               |              |              |
| 1 | -5.965534000 | 25.656216000 | 17.695559000 |    |               |              |              |
| 1 | -6.304498000 | 27.027556000 | 15.107841000 |    |               |              |              |
| 7 | -3.674080000 | 25.489657000 | 15.525284000 |    |               |              |              |
| 6 | -2.407248000 | 25.188958000 | 14.872231000 |    |               |              |              |
| 6 | -2.609136000 | 24.641925000 | 13.440453000 |    |               |              |              |
| 8 | -1.669265000 | 24.647913000 | 12.643971000 |    |               |              |              |
| 6 | -1.537261000 | 24.312277000 | 15.821290000 |    |               |              |              |
| 8 | -0.948287000 | 25.130026000 | 16.823231000 |    |               |              |              |
| 6 | -0.402076000 | 23.558543000 | 15.137681000 |    |               |              |              |
| 1 | -4.144855000 | 24.741370000 | 16.025747000 |    |               |              |              |
| 1 | -1.877853000 | 26.134225000 | 14.729715000 |    |               |              |              |
| 1 | -2.214444000 | 23.574213000 | 16.285245000 |    |               |              |              |
| 1 | -1.590137000 | 25.787933000 | 17.197064000 |    |               |              |              |
| 1 | 0.203599000  | 23.070649000 | 15.907680000 |    |               |              |              |
| 1 | 0.232707000  | 24.239209000 | 14.563573000 |    |               |              |              |
| 1 | -0.781868000 | 22.792364000 | 14.456653000 |    |               |              |              |
| 7 | -3.853825000 | 24.188531000 | 13.129031000 | 26 | 5.203326000   | 26.371958000 | 19.542716000 |
| 6 | -4.240188000 | 23.837003000 | 11.768504000 | 1  | 1.500470000   | 26.114010000 | 16.954160000 |
| 6 | -4.725121000 | 22.391058000 | 11.593901000 | 1  | 7.509441000   | 28.120132000 | 16.105491000 |
| 6 | -3.695331000 | 21.276776000 | 11.703874000 | 1  | 9.032629000   | 26.091000000 | 21.964810000 |
| 6 | -4.156456000 | 19.949528000 | 11.686950000 | 1  | 2.944244000   | 24.460562000 | 22.912124000 |
| 6 | -2.315086000 | 21.499561000 | 11.790159000 | 6  | 6.880242000   | 19.577416000 | 19.617057000 |
| 6 | -3.267939000 | 18.876331000 | 11.752719000 | 6  | 7.159559000   | 20.840896000 | 19.065621000 |
| 6 | -1.424285000 | 20.422321000 | 11.864114000 | 6  | 9.283480000   | 19.096140000 | 19.817995000 |
| 6 | -1.892502000 | 19.109431000 | 11.843971000 | 6  | 7.949726000   | 18.717139000 | 19.995549000 |
| 1 | -4.606270000 | 24.324147000 | 13.797131000 | 6  | 5.648939000   | 18.96508000  | 19.933559000 |
| 1 | -3.380557000 | 24.051084000 | 11.129318000 | 6  | 8.489727000   | 21.198561000 | 18.875686000 |
| 1 | -5.539775000 | 22.193109000 | 12.302951000 | 6  | 9.545242000   | 20.339875000 | 19.248463000 |
| 1 | -5.192805000 | 22.332986000 | 10.598610000 | 7  | 7.388053000   | 17.583028000 | 20.555591000 |
| 1 | -5.227868000 | 19.768513000 | 11.638750000 | 1  | 7.809856000   | 16.665943000 | 20.696181000 |
| 1 | -1.920818000 | 22.511025000 | 11.821685000 | 6  | 4.259483000   | 19.383317000 | 19.637477000 |
| 1 | -3.648808000 | 17.857248000 | 11.739406000 | 6  | 3.850700000   | 19.254044000 | 18.156302000 |
| 1 | -0.358176000 | 20.618029000 | 11.947400000 | 7  | 3.559312000   | 17.886268000 | 17.751614000 |
| 1 | -1.196540000 | 18.276976000 | 11.909085000 | 6  | 2.590307000   | 17.624185000 | 16.832048000 |
| 1 | 7.688572000  | 25.468778000 | 23.945185000 | 6  | 2.460563000   | 16.162177000 | 16.425185000 |

|    |              |              |              |   |              |              |              |
|----|--------------|--------------|--------------|---|--------------|--------------|--------------|
| 8  | 1.862925000  | 18.494973000 | 16.343641000 | 1 | 2.197417000  | 15.574277000 | 19.576937000 |
| 1  | 4.117287000  | 17.106429000 | 18.110898000 | 7 | -0.096637000 | 15.195516000 | 21.503848000 |
| 8  | 8.876944000  | 22.417827000 | 18.307210000 | 6 | -1.500687000 | 15.444098000 | 21.143025000 |
| 6  | 7.913208000  | 23.113513000 | 17.517123000 | 6 | -2.465636000 | 15.096986000 | 22.297124000 |
| 1  | 5.404302000  | 16.872780000 | 20.833416000 | 8 | -1.907699000 | 15.570749000 | 23.540156000 |
| 1  | 6.358181000  | 21.528734000 | 18.824697000 | 6 | -2.812214000 | 13.613796000 | 22.406526000 |
| 1  | 10.101080000 | 18.439443000 | 20.104566000 | 1 | 0.491700000  | 16.019090000 | 21.531334000 |
| 1  | 10.568628000 | 20.666796000 | 19.092407000 | 1 | -1.762906000 | 14.878980000 | 20.245196000 |
| 1  | 3.529546000  | 18.843901000 | 20.254103000 | 1 | -3.381825000 | 15.677143000 | 22.146681000 |
| 1  | 4.171311000  | 20.444596000 | 19.909431000 | 1 | -0.959997000 | 15.339763000 | 23.475167000 |
| 1  | 4.648113000  | 19.676632000 | 17.526634000 | 1 | -3.462489000 | 13.446081000 | 23.272536000 |
| 1  | 2.947620000  | 19.835863000 | 17.958792000 | 1 | -1.910846000 | 13.002550000 | 22.505390000 |
| 1  | 1.431160000  | 15.833633000 | 16.605979000 | 1 | -3.335462000 | 13.280475000 | 21.502904000 |
| 1  | 3.157989000  | 15.513085000 | 16.960695000 | 6 | -2.922425000 | 21.713423000 | 22.549653000 |
| 1  | 2.636220000  | 16.088245000 | 15.345828000 | 6 | -2.205661000 | 23.047487000 | 22.292076000 |
| 1  | 8.509001000  | 23.815498000 | 16.921870000 | 8 | -0.982850000 | 23.163065000 | 22.446321000 |
| 1  | 7.395594000  | 22.400809000 | 16.867788000 | 6 | -2.057587000 | 20.745774000 | 23.355875000 |
| 16 | 4.767946000  | 28.422130000 | 20.321654000 | 6 | -2.325663000 | 19.274485000 | 23.063360000 |
| 6  | 12.559438000 | 23.420090000 | 17.672113000 | 8 | -2.729948000 | 18.870373000 | 21.963834000 |
| 8  | 13.752948000 | 23.477041000 | 17.379254000 | 7 | -2.058342000 | 18.413772000 | 24.070330000 |
| 7  | 11.715911000 | 22.482324000 | 17.154652000 | 1 | -3.889716000 | 21.893200000 | 23.033405000 |
| 6  | 12.205478000 | 21.418767000 | 16.284149000 | 1 | -2.146967000 | 20.939145000 | 24.431892000 |
| 6  | 12.460764000 | 21.807948000 | 14.816482000 | 1 | -1.009914000 | 20.950978000 | 23.097067000 |
| 6  | 11.222088000 | 22.108734000 | 13.945740000 | 1 | -1.662537000 | 18.750955000 | 24.935233000 |
| 6  | 10.616931000 | 23.495514000 | 14.217288000 | 1 | -2.060824000 | 17.402272000 | 23.888134000 |
| 6  | 11.574090000 | 21.974618000 | 12.454809000 | 7 | -3.004564000 | 24.046394000 | 21.870220000 |
| 1  | 10.758329000 | 22.439090000 | 17.493554000 | 6 | -2.474143000 | 25.310945000 | 21.368169000 |
| 1  | 11.477680000 | 20.600696000 | 16.334547000 | 6 | -3.617387000 | 26.295639000 | 21.075360000 |
| 1  | 13.000144000 | 20.960652000 | 14.367574000 | 6 | -4.661119000 | 25.712388000 | 20.097346000 |
| 1  | 13.153674000 | 22.658660000 | 14.797503000 | 8 | -4.808800000 | 26.302624000 | 18.977736000 |
| 1  | 10.456290000 | 21.351035000 | 14.175092000 | 8 | -5.285577000 | 24.687412000 | 20.470166000 |
| 1  | 9.730456000  | 23.664517000 | 13.593489000 | 1 | -3.977973000 | 23.879725000 | 21.593959000 |
| 1  | 11.344585000 | 24.285129000 | 13.986160000 | 1 | -1.889633000 | 25.140003000 | 20.453647000 |
| 1  | 10.325409000 | 23.615183000 | 15.263933000 | 1 | -3.189335000 | 27.215899000 | 20.669098000 |
| 1  | 10.702201000 | 22.177155000 | 11.820733000 | 1 | -4.132471000 | 26.536104000 | 22.014793000 |
| 1  | 11.936674000 | 20.967059000 | 12.216951000 | 6 | -2.494449000 | 20.435716000 | 17.969020000 |
| 1  | 12.361672000 | 22.687184000 | 12.174361000 | 6 | -3.804871000 | 19.720630000 | 18.243064000 |
| 6  | 8.955922000  | 18.329816000 | 24.671166000 | 8 | -4.707615000 | 19.721161000 | 17.361499000 |
| 6  | 9.312322000  | 16.842932000 | 24.552067000 | 6 | -1.276504000 | 20.112965000 | 18.854503000 |
| 8  | 9.986402000  | 16.262397000 | 25.403907000 | 6 | -0.141511000 | 21.126680000 | 18.585113000 |
| 6  | 10.028131000 | 19.130081000 | 25.421775000 | 6 | -0.797513000 | 18.663978000 | 18.649449000 |
| 6  | 11.368904000 | 19.296610000 | 24.678423000 | 6 | 0.888081000  | 21.195516000 | 19.718605000 |
| 6  | 11.242420000 | 20.163762000 | 23.416102000 | 1 | -2.263420000 | 20.236244000 | 16.914860000 |
| 6  | 12.428960000 | 19.880613000 | 25.625124000 | 1 | -1.569604000 | 20.242019000 | 19.907116000 |
| 1  | 8.011086000  | 18.386555000 | 25.230407000 | 1 | 0.354661000  | 20.860917000 | 17.642138000 |
| 1  | 10.214972000 | 18.615427000 | 26.371287000 | 1 | -0.570968000 | 22.128516000 | 18.446233000 |
| 1  | 9.627472000  | 20.125483000 | 25.663583000 | 1 | -0.014627000 | 18.407384000 | 19.372114000 |
| 1  | 11.706519000 | 18.293977000 | 24.380672000 | 1 | -0.362371000 | 18.539112000 | 17.651276000 |
| 1  | 12.210268000 | 20.258585000 | 22.907989000 | 1 | -1.609932000 | 17.938250000 | 18.770226000 |
| 1  | 10.532706000 | 19.753081000 | 22.690218000 | 1 | 1.700598000  | 21.884860000 | 19.465249000 |
| 1  | 10.903219000 | 21.177062000 | 23.671046000 | 1 | 0.426193000  | 21.562302000 | 20.643464000 |
| 1  | 13.399692000 | 19.981030000 | 25.123537000 | 1 | 1.336206000  | 20.216373000 | 19.920822000 |
| 1  | 12.568081000 | 19.243123000 | 26.506562000 | 7 | -3.991974000 | 19.154467000 | 19.445329000 |
| 1  | 12.133861000 | 20.879048000 | 25.976724000 | 6 | -5.100212000 | 18.258588000 | 19.811649000 |
| 7  | 8.801621000  | 16.221975000 | 23.455803000 | 6 | -5.013745000 | 16.983776000 | 18.925042000 |
| 6  | 8.932719000  | 14.794489000 | 23.201081000 | 8 | -4.016125000 | 16.271278000 | 18.964991000 |
| 6  | 7.638115000  | 14.206313000 | 22.625707000 | 6 | -6.487446000 | 18.940899000 | 19.922546000 |
| 8  | 7.387332000  | 14.883534000 | 21.404539000 | 8 | -7.061072000 | 19.266035000 | 18.648004000 |
| 6  | 6.457591000  | 14.299830000 | 23.598956000 | 6 | -6.466355000 | 20.160568000 | 20.843188000 |
| 1  | 8.245981000  | 16.753786000 | 22.796964000 | 1 | -3.247882000 | 19.188478000 | 20.139875000 |
| 1  | 9.201592000  | 14.314910000 | 24.145858000 | 1 | -4.836105000 | 17.922468000 | 20.818285000 |
| 1  | 7.839183000  | 13.137926000 | 22.425915000 | 1 | -7.161852000 | 18.188981000 | 20.353669000 |
| 1  | 6.443901000  | 14.694014000 | 21.097714000 | 1 | -6.326232000 | 19.628343000 | 18.098222000 |
| 1  | 5.545609000  | 13.942911000 | 23.113683000 | 1 | -7.475556000 | 20.575731000 | 20.916508000 |
| 1  | 6.291970000  | 15.337858000 | 23.907937000 | 1 | -5.805449000 | 20.941573000 | 20.455294000 |
| 1  | 6.650073000  | 13.699379000 | 24.497412000 | 1 | -6.119401000 | 19.887922000 | 21.847136000 |
| 6  | 2.078017000  | 14.107940000 | 21.192896000 | 7 | -6.089753000 | 16.743426000 | 18.125833000 |
| 6  | 0.561403000  | 14.023374000 | 21.145201000 | 6 | -6.065923000 | 15.764762000 | 17.057281000 |
| 8  | -0.053134000 | 13.018804000 | 20.809612000 | 6 | -6.316721000 | 16.367392000 | 15.665832000 |
| 6  | 2.649521000  | 14.612748000 | 19.854880000 | 8 | -6.771237000 | 15.676697000 | 14.761781000 |
| 6  | 4.187162000  | 14.812147000 | 19.836587000 | 1 | -6.793993000 | 17.480257000 | 18.101073000 |
| 8  | 4.813540000  | 14.470822000 | 20.888774000 | 1 | -5.082653000 | 15.282652000 | 17.074320000 |
| 8  | 4.674949000  | 15.312069000 | 18.796700000 | 7 | -6.016973000 | 17.697506000 | 15.533366000 |
| 1  | 2.410947000  | 14.769501000 | 22.001001000 | 6 | -6.122049000 | 18.380966000 | 14.257776000 |
| 1  | 2.382781000  | 13.916471000 | 19.050522000 | 6 | -7.141016000 | 19.526506000 | 14.208781000 |

|   |              |              |              |
|---|--------------|--------------|--------------|
| 8 | -7.104651000 | 20.357714000 | 13.300647000 |
| 1 | -5.493391000 | 18.173212000 | 16.265629000 |
| 1 | -5.156413000 | 18.800784000 | 13.961459000 |
| 1 | -6.413608000 | 17.637127000 | 13.509484000 |
| 7 | -8.089949000 | 19.527626000 | 15.181379000 |
| 6 | -9.098311000 | 20.570961000 | 15.282097000 |
| 6 | -8.734430000 | 21.656647000 | 16.310538000 |
| 8 | -9.400718000 | 21.822814000 | 17.327559000 |
| 1 | -7.965073000 | 18.899172000 | 15.964280000 |
| 1 | -9.206614000 | 21.004460000 | 14.283566000 |
| 7 | -7.609999000 | 22.360569000 | 16.007300000 |
| 6 | -7.105157000 | 23.408036000 | 16.878162000 |
| 6 | -6.636023000 | 24.584048000 | 16.009332000 |
| 8 | -6.651224000 | 24.518114000 | 14.772302000 |
| 6 | -5.958047000 | 22.901238000 | 17.773811000 |
| 8 | -4.771743000 | 22.659091000 | 17.013139000 |
| 1 | -7.241981000 | 22.340242000 | 15.061524000 |
| 1 | -7.928510000 | 23.727655000 | 17.526737000 |
| 1 | -5.718752000 | 23.627821000 | 18.556289000 |
| 1 | -6.302702000 | 21.985684000 | 18.267398000 |
| 1 | -4.792180000 | 21.732844000 | 16.710840000 |
| 7 | -6.201810000 | 25.667626000 | 16.691046000 |
| 6 | -5.721106000 | 26.847209000 | 16.004245000 |
| 6 | -4.270482000 | 26.816720000 | 15.510157000 |
| 8 | -3.748934000 | 27.853206000 | 15.094262000 |
| 1 | -5.954669000 | 25.645808000 | 17.694511000 |
| 1 | -6.340813000 | 27.031117000 | 15.120700000 |
| 7 | -3.649097000 | 25.611806000 | 15.528806000 |
| 6 | -2.369400000 | 25.375602000 | 14.874796000 |
| 6 | -2.542782000 | 24.823534000 | 13.441008000 |
| 8 | -1.600364000 | 24.872301000 | 12.648894000 |
| 6 | -1.454766000 | 24.542122000 | 15.821411000 |
| 8 | -0.901171000 | 25.388480000 | 16.819820000 |
| 6 | -0.286980000 | 23.843182000 | 15.134237000 |
| 1 | -4.093277000 | 24.834744000 | 16.008781000 |
| 1 | -1.889093000 | 26.347260000 | 14.735706000 |
| 1 | -2.093703000 | 23.772584000 | 16.288731000 |
| 1 | -1.577775000 | 26.000903000 | 17.209862000 |
| 1 | 0.343939000  | 23.386971000 | 15.903673000 |
| 1 | 0.311551000  | 24.553119000 | 14.556836000 |
| 1 | -0.631914000 | 23.058536000 | 14.455796000 |
| 7 | -3.765204000 | 24.318319000 | 13.122659000 |
| 6 | -4.126832000 | 23.946234000 | 11.760771000 |
| 6 | -4.546974000 | 22.480006000 | 11.589311000 |
| 6 | -3.473407000 | 21.411095000 | 11.727468000 |
| 6 | -3.881547000 | 20.066695000 | 11.743449000 |
| 6 | -2.103080000 | 21.690211000 | 11.807590000 |
| 6 | -2.951400000 | 19.031503000 | 11.836578000 |
| 6 | -1.170585000 | 20.651046000 | 11.908400000 |
| 6 | -1.586259000 | 19.320541000 | 11.922331000 |
| 1 | -4.526730000 | 24.416636000 | 13.786912000 |
| 1 | -3.272772000 | 24.195169000 | 11.126856000 |
| 1 | -5.364926000 | 22.252995000 | 12.285713000 |
| 1 | -4.994156000 | 22.395192000 | 10.586484000 |
| 1 | -4.944933000 | 19.842741000 | 11.699223000 |
| 1 | -1.748214000 | 22.716695000 | 11.815257000 |
| 1 | -3.291671000 | 17.998144000 | 11.848834000 |
| 1 | -0.112909000 | 20.890422000 | 11.985705000 |
| 1 | -0.858161000 | 18.518367000 | 12.010226000 |
| 1 | 7.717230000  | 24.996107000 | 23.948626000 |
| 1 | 5.116577000  | 24.337525000 | 24.360939000 |
| 1 | 9.709860000  | 28.129980000 | 17.528402000 |
| 1 | 10.368914000 | 27.257306000 | 20.010917000 |
| 1 | 2.833204000  | 27.189522000 | 14.939169000 |
| 1 | 5.384445000  | 28.055923000 | 14.594472000 |
| 1 | 0.760123000  | 24.380386000 | 21.463730000 |
| 1 | 0.186529000  | 25.063758000 | 18.885531000 |
| 1 | 8.748077000  | 18.756732000 | 23.682984000 |
| 1 | 9.747970000  | 14.612657000 | 22.485978000 |
| 1 | 2.469699000  | 13.111204000 | 21.407095000 |
| 1 | -1.598387000 | 16.508680000 | 20.921209000 |
| 1 | -3.146992000 | 21.262779000 | 21.575747000 |
| 1 | -1.784320000 | 25.729139000 | 22.108881000 |
| 1 | -4.968046000 | 24.577326000 | 11.444243000 |
| 1 | -2.738007000 | 21.506463000 | 18.017994000 |

|   |               |              |              |
|---|---------------|--------------|--------------|
| 1 | 13.149234000  | 21.052742000 | 16.704757000 |
| 1 | -5.816872000  | 27.703277000 | 16.675685000 |
| 1 | -10.049380000 | 20.135763000 | 15.597414000 |
| 8 | -2.477986000  | 27.339605000 | 17.966987000 |
| 1 | -2.727278000  | 27.878149000 | 17.196939000 |
| 1 | -3.339089000  | 27.008234000 | 18.337249000 |
| 1 | -6.821625000  | 14.984579000 | 17.198793000 |
| 6 | 6.012050000   | 17.694600000 | 20.485659000 |
| 6 | 11.910377000  | 24.415225000 | 18.625906000 |
| 1 | 12.583467000  | 24.575940000 | 19.472883000 |
| 1 | 11.786142000  | 25.377386000 | 18.115727000 |
| 1 | 10.931965000  | 24.088364000 | 18.989255000 |
| 1 | 3.607517000   | 28.621432000 | 19.655318000 |
| 8 | 6.928650000   | 23.765750000 | 18.253172000 |
| 1 | 7.291988000   | 24.567977000 | 18.668574000 |

## IM2<sup>4</sup>

|    |              |              |              |
|----|--------------|--------------|--------------|
| 6  | 2.378796000  | 26.156540000 | 17.550665000 |
| 6  | 6.966524000  | 27.510428000 | 16.798270000 |
| 6  | 8.105556000  | 26.220520000 | 21.331251000 |
| 6  | 3.520899000  | 24.852713000 | 22.069937000 |
| 6  | 3.542304000  | 26.619771000 | 16.954964000 |
| 6  | 3.626855000  | 27.061585000 | 15.587079000 |
| 6  | 4.917357000  | 27.440347000 | 15.375693000 |
| 6  | 5.622289000  | 27.230477000 | 16.614231000 |
| 6  | 7.670021000  | 27.292610000 | 17.973585000 |
| 6  | 9.059728000  | 27.597084000 | 18.158193000 |
| 6  | 9.380957000  | 27.239265000 | 19.437209000 |
| 6  | 8.188729000  | 26.712483000 | 20.036557000 |
| 6  | 6.954465000  | 25.707016000 | 21.906478000 |
| 6  | 6.889565000  | 25.172666000 | 23.241811000 |
| 6  | 5.600269000  | 24.787793000 | 23.449708000 |
| 6  | 4.876346000  | 25.087890000 | 22.242193000 |
| 6  | 2.815997000  | 25.119978000 | 20.908594000 |
| 6  | 1.418175000  | 24.819759000 | 20.726875000 |
| 6  | 1.105281000  | 25.182229000 | 19.451171000 |
| 6  | 2.307826000  | 25.706433000 | 18.858571000 |
| 7  | 4.769647000  | 26.724254000 | 17.569923000 |
| 7  | 7.145029000  | 26.741753000 | 19.128858000 |
| 7  | 5.717406000  | 25.640044000 | 21.303380000 |
| 7  | 3.351925000  | 25.667987000 | 19.759978000 |
| 26 | 5.179530000  | 26.433982000 | 19.523580000 |
| 1  | 1.462964000  | 26.120830000 | 16.967344000 |
| 1  | 7.511751000  | 27.930051000 | 15.958442000 |
| 1  | 9.009096000  | 26.230267000 | 21.932623000 |
| 1  | 2.973327000  | 24.411072000 | 22.896171000 |
| 6  | 6.885631000  | 19.590585000 | 19.605071000 |
| 6  | 7.167772000  | 20.852898000 | 19.052472000 |
| 6  | 9.288019000  | 19.112921000 | 19.826107000 |
| 6  | 7.953368000  | 18.732458000 | 19.993599000 |
| 6  | 5.652890000  | 18.909191000 | 19.914774000 |
| 6  | 8.498992000  | 21.211972000 | 18.872646000 |
| 6  | 9.552720000  | 20.355816000 | 19.256034000 |
| 7  | 7.388945000  | 17.598719000 | 20.551131000 |
| 1  | 7.811567000  | 16.683116000 | 20.698488000 |
| 6  | 4.264894000  | 19.395351000 | 19.610770000 |
| 6  | 3.861523000  | 19.261079000 | 18.128523000 |
| 7  | 3.567454000  | 17.892641000 | 17.728332000 |
| 6  | 2.595172000  | 17.628800000 | 16.812716000 |
| 6  | 2.462264000  | 16.165590000 | 16.411383000 |
| 8  | 1.867604000  | 18.498882000 | 16.323343000 |
| 1  | 4.123899000  | 17.113045000 | 18.090407000 |
| 8  | 8.887936000  | 22.431847000 | 18.305755000 |
| 6  | 7.938723000  | 23.107862000 | 17.481021000 |
| 1  | 5.404147000  | 16.886881000 | 20.817040000 |
| 1  | 6.368373000  | 21.539515000 | 18.801715000 |
| 1  | 10.104090000 | 18.457947000 | 20.120876000 |
| 1  | 10.576916000 | 20.683710000 | 19.107625000 |
| 1  | 3.532096000  | 18.858655000 | 20.226370000 |
| 1  | 4.176415000  | 20.457643000 | 19.878657000 |
| 1  | 4.662641000  | 19.678696000 | 17.500283000 |
| 1  | 2.960738000  | 19.844489000 | 17.925118000 |
| 1  | 1.432983000  | 15.838972000 | 16.596341000 |
| 1  | 3.160291000  | 15.517443000 | 16.947239000 |

|    |              |              |              |   |              |              |              |
|----|--------------|--------------|--------------|---|--------------|--------------|--------------|
| 1  | 2.634646000  | 16.087619000 | 15.331800000 | 6 | -2.189846000 | 23.035135000 | 22.288043000 |
| 1  | 8.543122000  | 23.812512000 | 16.897438000 | 8 | -0.966030000 | 23.152965000 | 22.433647000 |
| 1  | 7.450139000  | 22.382247000 | 16.823449000 | 6 | -2.030934000 | 20.730315000 | 23.344467000 |
| 16 | 4.755131000  | 28.698950000 | 20.293024000 | 6 | -2.302184000 | 19.259725000 | 23.051496000 |
| 6  | 12.579837000 | 23.429527000 | 17.710041000 | 8 | -2.708129000 | 18.857600000 | 21.951775000 |
| 8  | 13.776085000 | 23.484132000 | 17.428384000 | 7 | -2.035884000 | 18.397621000 | 24.057346000 |
| 7  | 11.738801000 | 22.494611000 | 17.183577000 | 1 | -3.866753000 | 21.875145000 | 23.035459000 |
| 6  | 12.234264000 | 21.462950000 | 16.318165000 | 1 | -2.112662000 | 20.922365000 | 24.421294000 |
| 6  | 12.504671000 | 21.817342000 | 14.852883000 | 1 | -0.985145000 | 20.935431000 | 23.078251000 |
| 6  | 11.274971000 | 22.125113000 | 13.971733000 | 1 | -1.641324000 | 18.733046000 | 24.923470000 |
| 6  | 10.681900000 | 23.519259000 | 14.232103000 | 1 | -2.044443000 | 17.385993000 | 23.875561000 |
| 6  | 11.635695000 | 21.979788000 | 12.483963000 | 7 | -2.994428000 | 24.03619000  | 21.876516000 |
| 1  | 10.778241000 | 22.452650000 | 17.514294000 | 6 | -2.472099000 | 25.302251000 | 21.376414000 |
| 1  | 11.503736000 | 20.613481000 | 16.361653000 | 6 | -3.621248000 | 26.283421000 | 21.095716000 |
| 1  | 13.043221000 | 20.966978000 | 14.408900000 | 6 | -4.667612000 | 25.699834000 | 20.120635000 |
| 1  | 13.202281000 | 22.664276000 | 14.839744000 | 8 | -4.822906000 | 26.292385000 | 19.004065000 |
| 1  | 10.500247000 | 21.376158000 | 14.199786000 | 8 | -5.285694000 | 24.670655000 | 20.492473000 |
| 1  | 9.800420000  | 23.693418000 | 13.602630000 | 1 | -3.969295000 | 23.865147000 | 21.606163000 |
| 1  | 11.418605000 | 24.300233000 | 14.000242000 | 1 | -1.893858000 | 25.137190000 | 20.456782000 |
| 1  | 10.386336000 | 23.647672000 | 15.276601000 | 1 | -3.199774000 | 27.207736000 | 20.691905000 |
| 1  | 10.770287000 | 22.187987000 | 11.842867000 | 1 | -4.131850000 | 26.516466000 | 22.039421000 |
| 1  | 11.989470000 | 20.967352000 | 12.253733000 | 6 | -2.498231000 | 20.433568000 | 17.960709000 |
| 1  | 12.432476000 | 22.682766000 | 12.205326000 | 6 | -3.806275000 | 19.716266000 | 18.240370000 |
| 6  | 8.934903000  | 18.329701000 | 24.689360000 | 8 | -4.713543000 | 19.717854000 | 17.363542000 |
| 6  | 9.297215000  | 16.844752000 | 24.564182000 | 6 | -1.275012000 | 20.112113000 | 18.839336000 |
| 8  | 9.971369000  | 16.262766000 | 25.414903000 | 6 | -0.144057000 | 21.129133000 | 18.565103000 |
| 6  | 10.002549000 | 19.130607000 | 25.445751000 | 6 | -0.793479000 | 18.664546000 | 18.629854000 |
| 6  | 11.344664000 | 19.304658000 | 24.706564000 | 6 | 0.891500000  | 21.199349000 | 19.693043000 |
| 6  | 11.218162000 | 20.174275000 | 23.445940000 | 1 | -2.272347000 | 20.236070000 | 16.905052000 |
| 6  | 12.399436000 | 19.890871000 | 25.657784000 | 1 | -1.562815000 | 20.238964000 | 19.893650000 |
| 1  | 7.988779000  | 18.380285000 | 25.247037000 | 1 | 0.347919000  | 20.865850000 | 17.619259000 |
| 1  | 10.188769000 | 18.612844000 | 26.393691000 | 1 | -0.577060000 | 22.129923000 | 18.429639000 |
| 1  | 9.597913000  | 20.123689000 | 25.690525000 | 1 | -0.006495000 | 18.408725000 | 19.348267000 |
| 1  | 11.687367000 | 18.304203000 | 24.407343000 | 1 | -0.362992000 | 18.541841000 | 17.629396000 |
| 1  | 12.187278000 | 20.275205000 | 22.941463000 | 1 | -1.603578000 | 17.936761000 | 18.753714000 |
| 1  | 10.513147000 | 19.761698000 | 22.716532000 | 1 | 1.701239000  | 21.890611000 | 19.435785000 |
| 1  | 10.872970000 | 21.185257000 | 23.702125000 | 1 | 0.433679000  | 21.563551000 | 20.620941000 |
| 1  | 13.371261000 | 19.996372000 | 25.159391000 | 1 | 1.343374000  | 20.221207000 | 19.891427000 |
| 1  | 12.538515000 | 19.251981000 | 26.538206000 | 7 | -3.986610000 | 19.147433000 | 19.442369000 |
| 1  | 12.099184000 | 20.887286000 | 26.010729000 | 6 | -5.092881000 | 18.250593000 | 19.812760000 |
| 7  | 8.791533000  | 16.227120000 | 23.463741000 | 6 | -5.010776000 | 16.977446000 | 18.923407000 |
| 6  | 8.928311000  | 14.801498000 | 23.202003000 | 8 | -4.013118000 | 16.264663000 | 18.957634000 |
| 6  | 7.636891000  | 14.213173000 | 22.619587000 | 6 | -6.479666000 | 18.932324000 | 19.932238000 |
| 8  | 7.384848000  | 14.901297000 | 21.404812000 | 8 | -7.060227000 | 19.259537000 | 18.661434000 |
| 6  | 6.454829000  | 14.293024000 | 23.592180000 | 6 | -6.453976000 | 20.150242000 | 20.855120000 |
| 1  | 8.235008000  | 16.759466000 | 22.806157000 | 1 | -3.238982000 | 19.180217000 | 20.133212000 |
| 1  | 9.195914000  | 14.317526000 | 24.144888000 | 1 | -4.823438000 | 17.912641000 | 20.817349000 |
| 1  | 7.842428000  | 13.147578000 | 22.409902000 | 1 | -7.151518000 | 18.179406000 | 20.365574000 |
| 1  | 6.442436000  | 14.711452000 | 21.094860000 | 1 | -6.328620000 | 19.623348000 | 18.108440000 |
| 1  | 5.544763000  | 13.937341000 | 23.102427000 | 1 | -7.462764000 | 20.565337000 | 20.934240000 |
| 1  | 6.284985000  | 15.327487000 | 23.910733000 | 1 | -5.794877000 | 20.931985000 | 20.465630000 |
| 1  | 6.648398000  | 13.684781000 | 24.485136000 | 1 | -6.102321000 | 19.875574000 | 21.856893000 |
| 6  | 2.081395000  | 14.100083000 | 21.174657000 | 7 | -6.090001000 | 16.739388000 | 18.127925000 |
| 6  | 0.564801000  | 14.015351000 | 21.126998000 | 6 | -6.071163000 | 15.762417000 | 17.057749000 |
| 8  | -0.049779000 | 13.011644000 | 20.788944000 | 6 | -6.324210000 | 16.367226000 | 15.667637000 |
| 6  | 2.652499000  | 14.614667000 | 19.840229000 | 8 | -6.778937000 | 15.677537000 | 14.762946000 |
| 6  | 4.189173000  | 14.821581000 | 19.825291000 | 1 | -6.794522000 | 17.476141000 | 18.108196000 |
| 8  | 4.814051000  | 14.487106000 | 20.880574000 | 1 | -5.088857000 | 15.278262000 | 17.071360000 |
| 8  | 4.677270000  | 15.321002000 | 18.785359000 | 7 | -6.025354000 | 17.697710000 | 15.536855000 |
| 1  | 2.414637000  | 14.756118000 | 21.987055000 | 6 | -6.130306000 | 18.382674000 | 14.262028000 |
| 1  | 2.389989000  | 13.922135000 | 19.031347000 | 6 | -7.148798000 | 19.528675000 | 14.214624000 |
| 1  | 2.196509000  | 15.575829000 | 19.567117000 | 8 | -7.111203000 | 20.362067000 | 13.308572000 |
| 7  | -0.093203000 | 15.186349000 | 21.489267000 | 1 | -5.501409000 | 18.172565000 | 16.269387000 |
| 6  | -1.497327000 | 15.436071000 | 21.129696000 | 1 | -5.164512000 | 18.802599000 | 13.966387000 |
| 6  | -2.461630000 | 15.085940000 | 22.283530000 | 1 | -6.422132000 | 17.639836000 | 13.512844000 |
| 8  | -1.901898000 | 15.554323000 | 23.527895000 | 7 | -8.099062000 | 19.527256000 | 15.185923000 |
| 6  | -2.809756000 | 13.602762000 | 22.387552000 | 6 | -9.107413000 | 20.570457000 | 15.288195000 |
| 1  | 0.495083000  | 16.009826000 | 21.520025000 | 6 | -8.744729000 | 21.652451000 | 16.320894000 |
| 1  | -1.759896000 | 14.872983000 | 20.230714000 | 8 | -9.410203000 | 21.812766000 | 17.339367000 |
| 1  | -3.377303000 | 15.667710000 | 22.136401000 | 1 | -7.975279000 | 18.896463000 | 15.967110000 |
| 1  | -0.954757000 | 15.321484000 | 23.461298000 | 1 | -9.213799000 | 21.007123000 | 14.290851000 |
| 1  | -3.458807000 | 13.432226000 | 23.253916000 | 7 | -7.621705000 | 22.359612000 | 16.019973000 |
| 1  | -1.908900000 | 12.990107000 | 22.482364000 | 6 | -7.118493000 | 23.404464000 | 16.894883000 |
| 1  | -3.334919000 | 13.273855000 | 21.483421000 | 6 | -6.648840000 | 24.583229000 | 16.030015000 |
| 6  | -2.901831000 | 21.698760000 | 22.545777000 | 8 | -6.662727000 | 24.520850000 | 14.792812000 |

|   |               |              |              |   |             |              |              |
|---|---------------|--------------|--------------|---|-------------|--------------|--------------|
| 6 | -5.972102000  | 22.895251000 | 17.790142000 | 1 | 7.262723000 | 24.559695000 | 18.604575000 |
| 8 | -4.784734000  | 22.656846000 | 17.029873000 |   |             |              |              |
| 1 | -7.254011000  | 22.343950000 | 15.073986000 |   |             |              |              |
| 1 | -7.942762000  | 23.721673000 | 17.543491000 |   |             |              |              |
| 1 | -5.733805000  | 23.618942000 | 18.575638000 |   |             |              |              |
| 1 | -6.316607000  | 21.977631000 | 18.279994000 |   |             |              |              |
| 1 | -4.805225000  | 21.732408000 | 16.722116000 |   |             |              |              |
| 7 | -6.215777000  | 25.665025000 | 16.715325000 |   |             |              |              |
| 6 | -5.734328000  | 26.846567000 | 16.032340000 |   |             |              |              |
| 6 | -4.283293000  | 26.817245000 | 15.539337000 |   |             |              |              |
| 8 | -3.761366000  | 27.854524000 | 15.126155000 |   |             |              |              |
| 1 | -5.969368000  | 25.639930000 | 17.718819000 |   |             |              |              |
| 1 | -6.353316000  | 27.033230000 | 15.148888000 |   |             |              |              |
| 7 | -3.661525000  | 25.612373000 | 15.556098000 |   |             |              |              |
| 6 | -2.380542000  | 25.378871000 | 14.903833000 |   |             |              |              |
| 6 | -2.550400000  | 24.831372000 | 13.467840000 |   |             |              |              |
| 8 | -1.605719000  | 24.882018000 | 12.678525000 |   |             |              |              |
| 6 | -1.467757000  | 24.542383000 | 15.849270000 |   |             |              |              |
| 8 | -0.919026000  | 25.385125000 | 16.853809000 |   |             |              |              |
| 6 | -0.296850000  | 23.848342000 | 15.162422000 |   |             |              |              |
| 1 | -4.106034000  | 24.833826000 | 16.033364000 |   |             |              |              |
| 1 | -1.900419000  | 26.351223000 | 14.768817000 |   |             |              |              |
| 1 | -2.106834000  | 23.769777000 | 16.311180000 |   |             |              |              |
| 1 | -1.596592000  | 25.999934000 | 17.239083000 |   |             |              |              |
| 1 | 0.333240000   | 23.390124000 | 15.931340000 |   |             |              |              |
| 1 | 0.301598000   | 24.561535000 | 14.588940000 |   |             |              |              |
| 1 | -0.638676000  | 23.065760000 | 14.480066000 |   |             |              |              |
| 7 | -3.772170000  | 24.327787000 | 13.144920000 |   |             |              |              |
| 6 | -4.130523000  | 23.959657000 | 11.781079000 |   |             |              |              |
| 6 | -4.550516000  | 22.494015000 | 11.604315000 |   |             |              |              |
| 6 | -3.477713000  | 21.424373000 | 11.742989000 |   |             |              |              |
| 6 | -3.886659000  | 20.080198000 | 11.757947000 |   |             |              |              |
| 6 | -2.107238000  | 21.702630000 | 11.824090000 |   |             |              |              |
| 6 | -2.957144000  | 19.044438000 | 11.851096000 |   |             |              |              |
| 6 | -1.175421000  | 20.662853000 | 11.924970000 |   |             |              |              |
| 6 | -1.591902000  | 19.332602000 | 11.937933000 |   |             |              |              |
| 1 | -4.535224000  | 24.424481000 | 13.807657000 |   |             |              |              |
| 1 | -3.274891000  | 24.210291000 | 11.149962000 |   |             |              |              |
| 1 | -5.370782000  | 22.265326000 | 12.297435000 |   |             |              |              |
| 1 | -4.994420000  | 22.412168000 | 10.599781000 |   |             |              |              |
| 1 | -4.950145000  | 19.856928000 | 11.712911000 |   |             |              |              |
| 1 | -1.751842000  | 22.728919000 | 11.832583000 |   |             |              |              |
| 1 | -3.298023000  | 18.011273000 | 11.862459000 |   |             |              |              |
| 1 | -0.117645000  | 20.901526000 | 12.002992000 |   |             |              |              |
| 1 | -0.864331000  | 18.529969000 | 12.025817000 |   |             |              |              |
| 1 | 7.733303000   | 25.102064000 | 23.916606000 |   |             |              |              |
| 1 | 5.162806000   | 24.335260000 | 24.330459000 |   |             |              |              |
| 1 | 9.700207000   | 28.029522000 | 17.399679000 |   |             |              |              |
| 1 | 10.337742000  | 27.316960000 | 19.937823000 |   |             |              |              |
| 1 | 2.794994000   | 27.066104000 | 14.894637000 |   |             |              |              |
| 1 | 5.368835000   | 27.824226000 | 14.469463000 |   |             |              |              |
| 1 | 0.771541000   | 24.365878000 | 21.469810000 |   |             |              |              |
| 1 | 0.170732000   | 25.094661000 | 18.911062000 |   |             |              |              |
| 1 | 8.727488000   | 18.760291000 | 23.702667000 |   |             |              |              |
| 1 | 9.746262000   | 14.626339000 | 22.488332000 |   |             |              |              |
| 1 | 2.473090000   | 13.101857000 | 21.381966000 |   |             |              |              |
| 1 | -1.595085000  | 16.501190000 | 20.910504000 |   |             |              |              |
| 1 | -3.130967000  | 21.250565000 | 21.571799000 |   |             |              |              |
| 1 | -1.778712000  | 25.719908000 | 22.114079000 |   |             |              |              |
| 1 | -4.970828000  | 24.591817000 | 11.464338000 |   |             |              |              |
| 1 | -2.743477000  | 21.503785000 | 18.012605000 |   |             |              |              |
| 1 | 13.172871000  | 21.061004000 | 16.748053000 |   |             |              |              |
| 1 | -5.830526000  | 27.700644000 | 16.706243000 |   |             |              |              |
| 1 | -10.059126000 | 20.134471000 | 15.600470000 |   |             |              |              |
| 8 | -2.493484000  | 27.335735000 | 17.997485000 |   |             |              |              |
| 1 | -2.740146000  | 27.879743000 | 17.230416000 |   |             |              |              |
| 1 | -3.355842000  | 27.004021000 | 18.364698000 |   |             |              |              |
| 1 | -6.828017000  | 14.983543000 | 17.200282000 |   |             |              |              |
| 6 | 6.013421000   | 17.708595000 | 20.471631000 |   |             |              |              |
| 6 | 11.925338000  | 24.424295000 | 18.660700000 |   |             |              |              |
| 1 | 12.580322000  | 24.562033000 | 19.525893000 |   |             |              |              |
| 1 | 11.832923000  | 25.394712000 | 18.159608000 |   |             |              |              |
| 1 | 10.932804000  | 24.111266000 | 18.996821000 |   |             |              |              |
| 1 | 3.427195000   | 28.655966000 | 20.041471000 |   |             |              |              |
| 8 | 6.922765000   | 23.753167000 | 18.178735000 |   |             |              |              |
